# Supplementary material
Source: Elsevier journal article supplement (https://oceanrep.geomar.de/id/eprint/54411/4/mmc3.xlsx)
Supplement: mmc3 [file mmc3.xlsx]

## Sheet: TableS1
Row	Tree tip label	Family	Genus	Species	sample ID (COI / 28S)	Museum/Catalogue number	In BEAST tree (Data S1B)	CCZ/PERU (Fig 3)	Exon bp	COI bp	28S bp	Region	Depth	Latitude	Longitude	RAxML tree order
2	Acrocnida~brachiata~F218661_NEA_3	Amphiuridae	Acrocnida	brachiata	F218661	MV F218661	0	0	42730	1404	0	NEA	10	48.68	355.8	2
3	Actinozonella~spMoV5670~IE.2007.7101_IP_3	Ophioplocidae	Actinozonella	spMoV5670	IE.2007.7101	MNHN IE.2007.7101	0	0	38671	1428	0	IP	600	-19.82	165.55	316
4	Actinozonella~texturata~BP73_IP_3	Ophioplocidae	Actinozonella	texturata	BP73	MNHN IE.2007.2822	1	0	44252	1419	0	IP	271	-4.32	152.32	312
5	Amphilepis~neozelandica~F239900_AU_3	Amphilepididae	Amphilepis	neozelandica	F239900	MV F239900	1	0	41133	1413	0	AU	2803	-32.98	152.95	123
6	Amphilimna~granulosa~F112552_IP_3s	Amphilimnidae	Amphilimna	granulosa	F112552	MV F112552	0	0	44159	1428	990	IP	100	-22.85	113.51	357
7	Amphilimna~multispina~BP06_IP_3	Amphilimnidae	Amphilimna	multispina	BP06	MNHN IE.2007.2941	1	0	45634	1431	0	IP	291	-7.48	147.55	358
8	Amphilimna~olivacea~UF16671_WA_3	Amphilimnidae	Amphilimna	olivacea	UF16671	UF 16671	0	0	45277	1419	0	WA	94	6.87	306.95	355
9	Amphilimna~polyacantha~CP1800.2_IP_3	Amphilimnidae	Amphilimna	polyacantha	CP1800.2	MNHN	1	0	45099	1428	0	IP	358	-9.357	160.398	354
10	Amphilimna~spnov~IE.2007.4148_IN_3	Amphilimnidae	Amphilimna	spnov	IE.2007.4148	MNHN IE.2007.4148	0	0	45275	1428	0	IN	111	-25.75	46	356
12	Amphiodia~urtica~UF6015_NEP_3s	Amphiuridae	Amphiodia	urtica	UF6015	UF 6015	0	0	44769	1431	985	NEP	50	48	237	113
13	Amphiophiura~bakeri~BP42_IP_3	Ophiopyrgidae	Amphiophiura	bakeri	BP42	MNHN	0	0	45809	1419	0	IP	690	-2.22	150.38	1054
14	Amphiophiura~bullata.bullata~F214069.2_NWP_3	Ophiopyrgidae	Amphiophiura	bullata.bullata	F214069.2	MV F214069	0	0	45785	1431	0	NWP	5377	43.5913	153.965	1042
15	Amphiophiura~bullata.convexa~CAS161424_AN_3s	Ophiopyrgidae	Amphiophiura	bullata.convexa	CAS161424	CAS 161424	1	0	45642	1425	986	AN	5193.5	-61.14	300.71	1037
16	Amphiophiura~bullata.convexa~F227587_AU_3s	Ophiopyrgidae	Amphiophiura	bullata.convexa	F227587	MV F227587	0	0	45200	1431	988	AU	4607	-36.06	132.63	1040
17	Amphiophiura~bullata.convexa~F237953_IP_3s	Ophiopyrgidae	Amphiophiura	bullata.convexa	F237953	MV F237953	0	0	45760	1431	988	IP	2574.5	-28.67	154.2	1041
18	Amphiophiura~bullata.convexa~F222694.1_SA_3s	Ophiopyrgidae	Amphiophiura	bullata.convexa	F222694.1	MV F222694	0	0	45641	1431	988	SA	5055	-36.377	5.816	1036
19	Amphiophiura~bullata.convexa~PS139.5_SM_3s	Ophiopyrgidae	Amphiophiura	bullata.convexa	PS139.5	CAS	0	0	45699	1425	986	SM	3939.5	-58.251	335.633	1039
20	Amphiophiura~bullata.vitjazi~PS044.1_AN_3s	Ophiopyrgidae	Amphiophiura	bullata.vitjazi	PS044.1	CAS	0	0	45736	1425	986	AN	353.5	-60.968	304.886	1038
21	Amphiophiura~cf.canaliculata~DW3891.2_IP_3	Ophiopyrgidae	Amphiophiura	cf.canaliculata	DW3891.2	MNHN	0	0	45943	1419	0	IP	585	-22.418	171.685	1047
22	Amphiophiura~cf.improba~IE.2007.5248_IP_3s	Ophiopyrgidae	Amphiophiura	cf.improba	IE.2007.5248	MNHN IE.2007.5248	0	0	45603	1431	986	IP	1083	-21.4	162.62	1035
23	Amphiophiura~cf.insolita~UF13007_IP_3s	Ophiopyrgidae	Amphiophiura	cf.insolita	UF13007	UF 13007	1	0	45878	1431	987	IP	744	-18	210	1059
24	Amphiophiura~cf.insolita2~BP47.2_IP_3s	Ophiopyrgidae	Amphiophiura	cf.insolita2	BP47.2	MNHN	0	0	45958	1428	989	IP	398.5	-5.617	154.017	1061
25	Amphiophiura~cf.liberata~BP44_IP_3	Ophiopyrgidae	Amphiophiura	cf.liberata	BP44	MNHN IE.2007.2873	0	0	45333	1428	0	IP	713	-4.07	151.83	1049
26	Amphiophiura~collecta~F227340_AU_3	Ophiopyrgidae	Amphiophiura	collecta	F227340	MV F227340	0	0	45237	1431	0	AU	168	-43.98	147.29	1170
27	Amphiophiura~concava~TOH276-IE.2007.4343_IN_3s	Ophiopyrgidae	Amphiophiura	concava	TOH276-IE.2007.4343	MNHN IE.2007.4343	0	0	45913	1431	987	IN	865.5	-25.58	44.25	1057
28	Amphiophiura~concava~IE.2007.6880_IP_3s	Ophiopyrgidae	Amphiophiura	concava	IE.2007.6880	MNHN IE.2007.6880	0	0	44751	1428	987	IP	835	-19.86	165.92	1060
29	Amphiophiura~confecta~IE.2007.6806_IP_3s	Ophiopyrgidae	Amphiophiura	confecta	IE.2007.6806	MNHN IE.2007.6806	0	0	45110	1428	986	IP	301	-22	167.01	1078
30	Amphiophiura~distincta~F112578_AU_3	Ophiopyrgidae	Amphiophiura	distincta	F112578	MV F112578	0	0	40887	1431	0	AU	212.5	-35.33	118.34	1074
31	Amphiophiura~distincta~SBD001284_IP_3	Ophiopyrgidae	Amphiophiura	distincta	SBD001284	MTQ SBD001284	0	0	44429	1431	0	IP	74.05	-18.36	147.28	1073
32	Amphiophiura~gibbosa~F214047_AN_3s	Ophiopyrgidae	Amphiophiura	gibbosa	F214047	MV F214047	1	0	45936	1428	986	AN	123	-61.17	304.07	1182
33	Amphiophiura~inops~F239732_AU_3	Ophiopyrgidae	Amphiophiura	inops	F239732	MV F239732	0	0	45874	1431	0	AU	2534.5	-32.575	153.162	1071
34	Amphiophiura~inops~PS141.9_SM_3	Ophiopyrgidae	Amphiophiura	inops	PS141.9	CAS	1	0	45961	1428	0	SM	2284	-58.414	334.986	1072
35	Amphiophiura~insolita~IE.2007.6922_IP_3s	Ophiopyrgidae	Amphiophiura	insolita	IE.2007.6922	MNHN IE.2007.6922	0	0	45500	1431	987	IP	418.5	-18.57	164.33	1062
37	Amphiophiura~laudata~MVF193422_NZ_3s	Ophiopyrgidae	Amphiophiura	laudata	MVF193422	MV F193422	1	0	35566	1431	986	NZ	888.5	-36.445	177.839	1080
38	Amphiophiura~liberata~BP43_IP_3	Ophiopyrgidae	Amphiophiura	liberata	BP43	MNHN IE.2007.2820	0	0	45974	1290	0	IP	690	-2.22	150.38	1052
39	Amphiophiura~metabula~TIM014_WA_3s	Ophiopyrgidae	Amphiophiura	metabula	TIM014	UNAM-ICML	0	0	45257	1431	986	WA	595	23.38	273.11	1087
40	Amphiophiura~ornata~F237932_IP_3	Ophiopyrgidae	Amphiophiura	ornata	F237932	MV F237932	1	0	45816	1416	0	IP	2548	-26.94	153.94	1026
41	Amphiophiura~paraconcava~F237934_IP_3s	Ophiopyrgidae	Amphiophiura	paraconcava	F237934	MV F237934	0	0	45905	1428	988	IP	2349	-23.75	154.63	1058
42	Amphiophiura~pertusa~BP49_IP_3	Ophiopyrgidae	Amphiophiura	pertusa	BP49	MNHN	1	0	45974	1431	0	IP	349	-8.27	150.48	1048
43	Amphiophiura~prisca~CP2231.1_IP_3	Ophiopyrgidae	Amphiophiura	prisca	CP2231.1	MNHN	0	0	45968	1431	0	IP	1091.5	-6.417	156.35	1050
44	Amphiophiura~radiata~NIWA67141_NZ_3	Ophiopyrgidae	Amphiophiura	radiata	NIWA67141	NIWA 67141	0	0	45854	1023	0	NZ	1478.5	-33.7	179.85	1027
45	Amphiophiura~sculptilis~F237935_IP_3s	Ophiopyrgidae	Amphiophiura	sculptilis	F237935	MV F237935	0	0	45881	1431	986	IP	2574.5	-28.67	154.2	1088
46	Amphiophiura~solida~IE.2007.5420_IP_3	Ophiopyrgidae	Amphiophiura	solida	IE.2007.5420	MNHN IE.2007.5420	0	0	45793	1431	0	IP	675	-21.1	160.8	1053
47	Amphiophiura~sordida~BP41_IP_3s	Ophiopyrgidae	Amphiophiura	sordida	BP41	MNHN IE.2007.2928	0	0	45840	1428	987	IP	428	-6.75	148.02	1056
48	Amphiophiura~sp~TOH272-IE.2014.2049_IP_3	Ophiopyrgidae	Amphiophiura	sp	TOH272-IE.2014.2049	MNHN IE.2014.2049	0	0	45592	1431	0	IP	1668.5	21.62	118.3	1044
49	Amphiophiura~spatulifera~BP48_IP_3s	Ophiopyrgidae	Amphiophiura	spatulifera	BP48	MNHN IE.2007.2817	1	0	45885	1431	986	IP	994.5	-3.27	147.3	1045
50	Amphiophiura~spatulifera~MVF193425_NZ_3s	Ophiopyrgidae	Amphiophiura	spatulifera	MVF193425	MV F193425	0	0	34685	1431	986	NZ	1239.5	-37.365	177.879	1046
51	Amphiophiura~spMoV5231~IE.2007.7514_IP_3	Ophiopyrgidae	Amphiophiura	spMoV5231	IE.2007.7514	MNHN IE.2007.7514	0	0	45968	1431	0	IP	701	-19.58	158.8	1051
53	Amphiophiura~urbana~BP54_IP_3	Ophiopyrgidae	Amphiophiura	urbana	BP54	MNHN IE.2007.2858	0	0	45964	1431	0	IP	398.5	-5.62	154.02	1169
54	Amphioplus~andreae~BP09_IP_3	Amphiuridae	Amphioplus	andreae	BP09	MNHN IE.2007.2841	0	0	44295	1431	0	IP	555.5	-3.88	144.68	86
55	Amphioplus~cf.daleus~NIWA14812_NZ_3	Amphiuridae	Amphioplus	cf.daleus	NIWA14812	NIWA 14812	1	0	44432	1410	0	NZ	2538	-39.37	179.84	13
56	Amphioplus~cipus~MVF188861_NZ_3s	Amphiuridae	Amphioplus	cipus	MVF188861	MV F188861	0	0	39040	1431	987	NZ	1464.5	-36.803	177.481	47
57	Amphioplus~consors~CAS161421_AN_3s	Amphiuridae	Amphioplus	consors	CAS161421	CAS 161421	0	0	43036	1419	986	AN	5193.5	-61.14	300.71	9
58	Amphioplus~consors~PS139.5b_SM_3s	Amphiuridae	Amphioplus	consors	PS139.5b	CAS	0	0	39998	1419	986	SM	3939.5	-58.251	335.633	8
59	Amphioplus~ctenacantha~MVF188862_NZ_3s	Amphiuridae	Amphioplus	ctenacantha	MVF188862	MV F188862	0	0	33341	1431	986	NZ	692.5	-37.504	177.619	45
60	Amphioplus~daleus~F239995_AU_3s	Amphiuridae	Amphioplus	daleus	F239995	MV F239995	0	0	42349	1410	709	AU	2534.5	-32.57	153.16	14
61	Amphioplus~daleus~AB02.CS.20_EP_3s	Amphiuridae	Amphioplus	daleus	AB02.CS.20	BMNH	0	1	44378	1419	709	EP	4647	12.531	243.377	10
62	Amphioplus~depressus~KGR23021_IP_3	Amphiuridae	Amphioplus	depressus	KGR23021	WAM	1	0	44306	1431	0	IP	37	-13.84	127.2	87
63	Amphioplus~didymus~WAM.Z26138_IP_3	Amphiuridae	Amphioplus	didymus	WAM.Z26138	WAM	0	0	41836	1422	0	IP	na	-15.895	124.339	85
64	Amphioplus~integer~TOH277-IE.2007.4326_IN_3	Amphiuridae	Amphioplus	integer	TOH277-IE.2007.4326	MNHN IE.2007.4326	0	0	44889	1428	0	IN	64.5	-25.07	47.05	88
65	Amphioplus~laevis~10004744_IP_3	Amphiuridae	Amphioplus	laevis	10004744	MV F241495	0	0	44361	1410	0	IP	22.4	-14	125	89
66	Amphioplus~lucidus~F111916_IP_3s	Amphiuridae	Amphioplus	lucidus	F111916	MV F111916	0	0	37507	1422	596	IP	403.5	-21	114.38	79
67	Amphioplus~ochroleuca~KGR29907_IP_3	Amphiuridae	Amphioplus	ochroleuca	KGR29907	WAM	0	0	44912	1431	0	IP	59	-13.79	127.27	15
68	Amphioplus~pegasus~NIWA68313_NZ_3	Amphiuridae	Amphioplus	pegasus	NIWA68313	NIWA 68313	0	0	45520	1404	0	NZ	495	-41.31	176.19	37
69	Amphioplus~peregrinator~F214052_AN_3s	Amphilepididae	Amphioplus	peregrinator	F214052	MV F214052	0	0	42219	1422	983	AN	339.35	-62.36	298.57	114
70	Amphioplus~personatus~10001080_IP_3s	Amphiuridae	Amphioplus	personatus	10001080	MV F228003	0	0	33503	1410	984	IP	46.2	-15.27	124.36	80
72	Amphioplus~spMoV4890~BP08_IP_3	Amphilepididae	Amphioplus	spMoV4890	BP08	MNHN	1	0	41246	1431	0	IP	616.5	-6.02	147.58	118
73	Amphioplus~spMoV4892~F99682b_NZ_3s	Amphilepididae	Amphioplus	spMoV4892	F99682b	MV F99682	0	0	36899	1410	676	NZ	1464.5	-33.7	167.45	117
74	Amphioplus~spMoV5509~F111903_IP_3	Amphiuridae	Amphioplus	spMoV5509	F111903	MV F111903	0	0	36934	1425	0	IP	173.5	-21.97	113.82	81
76	Amphioplus~verrilli~F239744_AU_3	Amphiuridae	Amphioplus	verrilli	F239744	MV F239744	0	0	43789	1410	0	AU	4226.5	-33.44	152.7	6
79	Amphipholis~cf.squamata~MVF214040_WA_3s	Amphiuridae	Amphipholis	cf.squamata	MVF214040	MV F214040	0	0	44134	1431	983	WA	3	26.783	279.956	99
80	Amphipholis~januarii~UF11904_WA_3s	Amphiuridae	Amphipholis	januarii	UF11904	UF 11904	0	0	44597	1419	986	WA	5	18.09	296.98	107
81	Amphipholis~kochii~TIM040_NWP_3s	Amphiuridae	Amphipholis	kochii	TIM040	NSMT E6534	0	0	44627	1431	986	NWP	0.5	43.21	140.85	109
82	Amphipholis~linopneusti~IE.2007.7480_IP_3	Amphiuridae	Amphipholis	linopneusti	IE.2007.7480	MNHN IE.2007.7480	0	0	45682	1419	0	IP	520.5	-19.62	158.7	100
83	Amphipholis~misera~BP07_IP_3	Amphiuridae	Amphipholis	misera	BP07	MNHN IE.2007.2874	1	0	43602	1431	0	IP	271	-4.32	152.32	78
84	Amphipholis~sp1~AM.J24929_IP_3	Amphiuridae	Amphipholis	sp1	AM.J24929	AM J24929	0	0	43770	1425	0	IP	21	-29.27	182.07	96
85	Amphipholis~sp2~AM.J24929.2_IP_3s	Amphiuridae	Amphipholis	sp2	AM.J24929.2	AM J24929	0	0	44854	1428	986	IP	21	-29.27	182.07	95
86	Amphipholis~squamata~GLB.009_AU_3	Amphiuridae	Amphipholis	squamata	GLB.009	MV	0	0	45486	1428	0	AU	1.5	-37.885	147.977	93
89	Amphipholis~squamata~A65682_SA_3	Amphiuridae	Amphipholis	squamata	A65682	SAMC MB-A65682	0	0	45308	1428	0	SA	na	-33.8991	18.4086	92
90	Amphistigma~minuta~F173962_AU_3	Amphiuridae	Amphistigma	minuta	F173962	MV F173962	0	0	45593	1419	0	AU	0.5	-38.48	145.03	94
92	Amphiura~alternans~F166099_SK_3s	Amphiuridae	Amphiura	alternans	F166099	MV F166099	0	0	45492	1425	986	SK	648	-54.567	3.367	54
94	Amphiura~angularis~IE.2009.6696_AN_3	Amphiuridae	Amphiura	angularis	IE.2009.6696	MNHN IE.2009.6696	0	0	45092	1410	0	AN	808	-65.46	139.3	57
95	Amphiura~antarctica~TOH243-IE.2011.60_SK_3	Amphiuridae	Amphiura	antarctica	TOH243-IE.2011.60	MNHN IE.2011.60	0	0	45268	1428	0	SK	100.5	-48.94	70.01	41
96	Amphiura~belgicae~F168824_AN_3s	Amphiuridae	Amphiura	belgicae	F168824	MV F168824	0	0	45243	1425	956	AN	146.5	-60.42	313.58	35
98	Amphiura~bidentata~F168028_IP_3	Amphilepididae	Amphiura	bidentata	F168028	MV F168028	1	0	43395	1425	0	IP	435	-17.01	119.59	122
99	Amphiura~capensis~A66817_SA_3	Amphiuridae	Amphiura	capensis	A66817	SAMC MB-A66817	0	0	45095	1428	0	SA	na	-33.8989	18.4095	60
100	Amphiura~cf.magellanica~IE.2007.7105_IP_3	Amphiuridae	Amphiura	cf.magellanica	IE.2007.7105	MNHN IE.2007.7105	0	0	34233	1431	0	IP	418.5	-18.57	164.33	77
101	Amphiura~chiajei~chiajei2_NEA_3s	Amphiuridae	Amphiura	chiajei	chiajei2	MV	0	0	43643	1425	986	NEA	na	58	11	3
102	Amphiura~constricta~MVF214042_AU_3s	Amphiuridae	Amphiura	constricta	MVF214042	MV F214042	0	0	44763	1431	988	AU	1	-38.67	145.667	59
103	Amphiura~correcta~55001_NZ_3	Amphiuridae	Amphiura	correcta	55001	NIWA 55001	0	0	45160	1431	0	NZ	137	-35.24	174.48	24
104	Amphiura~deficiens~IE.2009.6464_AN_3s	Amphiuridae	Amphiura	deficiens	IE.2009.6464	MNHN IE.2009.6464	0	0	45526	1410	527	AN	244	-66	142.01	36
105	Amphiura~diacritica~UF9561_IP_3	Amphiuridae	Amphiura	diacritica	UF9561	UF 9561	1	0	45313	1431	0	IP	1.5	-22.69	113.65	61
106	Amphiura~dikellacantha~68321_NZ_3	Amphiuridae	Amphiura	dikellacantha	68321	NIWA 68321	0	0	45449	1431	0	NZ	495	-41.31	176.19	43
107	Amphiura~diomedeae~TOH214-MNHN_IP_3	Amphilepididae	Amphiura	diomedeae	TOH214-MNHN	MNHN	0	0	41906	1425	0	IP	800	9.4	123.82	121
108	Amphiura~diomedeae~UF14001_NEP_3	Amphilepididae	Amphiura	diomedeae	UF14001	UF 14001	0	0	42577	1425	0	NEP	2900	37.66	236.49	120
109	Amphiura~duncani~UF12422_IP_3	Amphiuridae	Amphiura	duncani	UF12422	UF 12422	0	0	45281	1431	0	IP	69	-17.48	210.07	71
110	Amphiura~elandiformis~F101808_AU_3	Amphiuridae	Amphiura	elandiformis	F101808	MV F101808	0	0	45017	1410	0	AU	8	-38.27	144.7	25
111	Amphiura~eugeniae~CAS161395_AN_3s	Amphiuridae	Amphiura	eugeniae	CAS161395	CAS 161395	0	0	42120	1428	905	AN	2893.5	-60.63	306.04	33
112	Amphiura~eugeniae.abyssalis~CAS161537_AN_3s	Amphiuridae	Amphiura	eugeniae.abyssalis	CAS161537	CAS 161537	0	0	43817	1431	986	AN	3970	-60.51	303.91	49
113	Amphiura~filiformis~filiformis2_NEA_3	Amphiuridae	Amphiura	filiformis	filiformis2	MV	1	0	44522	1422	426	NEA	na	58	11	5
114	Amphiura~joubini~IE.2009.6424_AN_3s	Amphiuridae	Amphiura	joubini	IE.2009.6424	MNHN IE.2009.6424	0	0	45466	1422	986	AN	562.5	-66.31	143.63	46
115	Amphiura~joubini.abyssalis~CAS161402_AN_3	Amphiuridae	Amphiura	joubini.abyssalis	CAS161402	CAS 161402	0	0	44812	1431	494	AN	2223.5	-61.38	301.2	50
116	Amphiura~lanceolata~NIWA15013_NZ_3	Amphiuridae	Amphiura	lanceolata	NIWA15013	NIWA 15013	1	0	45302	1425	0	NZ	2350	-39.4	179.9	48
118	Amphiura~latisquama~NIWA42206_NZ_3	Amphiuridae	Amphiura	latisquama	NIWA42206	NIWA 42206	0	0	45128	1122	0	NZ	378	-43.53	179.62	38
119	Amphiura~magellanica~F227364_AU_3s	Amphiuridae	Amphiura	magellanica	F227364	MV F227364	0	0	35087	1428	985	AU	1060	-44.17	147.18	75
120	Amphiura~magellanica~77794_NZ_3s	Amphiuridae	Amphiura	magellanica	77794	NIWA 77794	0	0	44820	1431	985	NZ	53	-34.91	173.83	73
121	Amphiura~maxima~KGR29860_IP_3	Amphiuridae	Amphiura	maxima	KGR29860	WAM	1	0	45261	1431	0	IP	59	-13.79	127.27	30
122	Amphiura~microsoma~F93694_IP_3	Amphiuridae	Amphiura	microsoma	F93694	MV F93694	0	0	45351	1425	0	IP	8.5	-12.22	122.98	68
123	Amphiura~octacantha~UF9562_IP_3	Amphiuridae	Amphiura	octacantha	UF9562	UF 9562	0	0	45433	1431	0	IP	1.5	-22.69	113.65	29
124	Amphiura~poecila~F211038_AU_3	Amphiuridae	Amphiura	poecila	F211038	MV F211038	0	0	45622	1410	0	AU	0.5	-38.08	144.43	66
125	Amphiura~proposita~IE.2009.6169_AN_3s	Amphilepididae	Amphiura	proposita	IE.2009.6169	MNHN IE.2009.6169	0	0	42215	1422	985	AN	190	-66.56	141.25	115
126	Amphiura~ptena~F194776_AU_3	Amphiuridae	Amphiura	ptena	F194776	MV F194776	0	0	45606	1431	0	AU	0.5	-38.35	144.33	64
127	Amphiura~rosea~77781_NZ_3	Amphiuridae	Amphiura	rosea	77781	NIWA 77781	0	0	38195	1431	0	NZ	23.5	-40.74	172.96	42
128	Amphiura~septemspinosa~F193498_IP_3s	Amphiuridae	Amphiura	septemspinosa	F193498	MV F193498	0	0	35734	1431	990	IP	55	-13.79	127.24	62
131	Amphiura~spinipes~70686_NZ_3	Amphiuridae	Amphiura	spinipes	70686	NIWA 70686	0	0	44946	1431	0	NZ	1332.5	-35.36	178.52	76
132	Amphiura~spMoV2722~F168693_AU_3s	Amphiuridae	Amphiura	spMoV2722	F168693	MV F168693	1	0	45512	1425	986	AU	2047	-44.38	147.27	53
133	Amphiura~spMoV3579~F112623_AU_3	Amphiuridae	Amphiura	spMoV3579	F112623	MV F112623	0	0	45264	1416	0	AU	410	-33	114.57	44
134	Amphiura~spMoV5508~BP10_IP_3	Amphiuridae	Amphiura	spMoV5508	BP10	MNHN IE.2007.2876	1	0	45421	1431	0	IP	291	-7.48	147.55	26
135	Amphiura~spMoV5512~F168019_IP_3	Amphiuridae	Amphiura	spMoV5512	F168019	MV F168019	0	0	45050	1410	0	IP	80	-18.46	120.14	70
136	Amphiura~spMoV5516~F168022_IP_3	Amphiuridae	Amphiura	spMoV5516	F168022	MV F168022	0	0	41934	1410	0	IP	104	-14.56	122.9	69
137	Amphiura~stictacantha~F210924_AU_3	Amphiuridae	Amphiura	stictacantha	F210924	MV F210924	0	0	44849	1410	0	AU	3.25	-33.63	115.34	67
138	Amphiura~tenuis~F109832.2_IP_3	Amphiuridae	Amphiura	tenuis	F109832.2	MV F109832	1	0	43486	1419	0	IP	2.75	-19.183	146.833	4
139	Amphiura~trisacantha~F101877_AU_3	Amphiuridae	Amphiura	trisacantha	F101877	MV F101877	0	0	45015	1410	0	AU	6	-38.79	146.37	58
140	Amphiura~tutanekai~77788_NZ_3	Amphiuridae	Amphiura	tutanekai	77788	NIWA 77788	1	0	45921	1431	0	NZ	205	-38.44	173.31	55
141	Amphiura~uncinata~IE.2007.4175_IN_3	Amphiuridae	Amphiura	uncinata	IE.2007.4175	MNHN IE.2007.4175	0	0	44714	1410	0	IN	401	-25.05	43.96	27
142	Amphiura~uncinata~TOH212-IE.2007.608_IP_3	Amphiuridae	Amphiura	uncinata	TOH212-IE.2007.608	MNHN IE.2007.608	0	0	23085	1431	0	IP	800	9.4	123.82	28
143	Amphiura~velox~F168054_IP_3	Amphiuridae	Amphiura	velox	F168054	MV F168054	0	0	45449	1404	0	IP	33	-23.79	113.48	63
144	Aspidophiura~forbesi~BP60_IP_3	Ophiopyrgidae	Aspidophiura	forbesi	BP60	MNHN IE.2007.2939	1	0	45041	1431	0	IP	340.5	-1.9	147.2	1066
145	Aspidophiura~minuta~CAS161462_SM_3s	Ophiopyrgidae	Aspidophiura	minuta	CAS161462	CAS 161462	1	0	45918	1428	987	SM	2951.5	-58.26	335.1	1070
146	Aspidophiura~sp~IE.2007.6773_IP_3	Ophiopyrgidae	Aspidophiura	sp	IE.2007.6773	MNHN IE.2007.6773	0	0	44870	1428	0	IP	1056.5	-19.06	164.02	1064
148	Asteromorpha~koehleri~F111585_AU_3	Euryalidae	Asteromorpha	koehleri	F111585	MV F111585	0	0	39619	1428	0	AU	97.5	-34.88	115.5	866
149	Asteromorpha~rousseaui~7.4159_IN_3	Euryalidae	Asteromorpha	rousseaui	7.4159	MNHN IE.2007.4159	1	0	44620	1431	0	IN	130.5	-25.63	46.21	868
150	Asteronyx~loveni~F239724_AU_3s	Asteronychidae	Asteronyx	loveni	F239724	MV F239724	0	0	45407	1428	988	AU	2534.5	-32.57	153.16	856
151	Asteronyx~loveni~BP01_IP_3s	Asteronychidae	Asteronyx	loveni	BP01	MNHN IE.2007.2901	0	0	45285	1431	988	IP	459	-9.13	152.32	858
155	Asteronyx~loveni~MVF188855_NZ_3s	Asteronychidae	Asteronyx	loveni	MVF188855	MV F188855	1	0	45012	1431	988	NZ	1239.5	-37.365	177.879	861
156	Asteronyx~loveni~A88410_SK_3s	Asteronychidae	Asteronyx	loveni	A88410	SAMC MB-A88410	0	0	44404	1431	988	SK	298	-46.74	38.06	863
157	Asteronyx~loveni~TIMX09_WA_3	Asteronychidae	Asteronyx	loveni	TIMX09	UNAM-ICML	0	0	44642	1431	0	WA	428	22.33	268.3	852
158	Asteronyx~luzonicus~BP02_IP_3	Asteronychidae	Asteronyx	luzonicus	BP02	MNHN	0	0	45582	1431	0	IP	690	-2.22	150.38	855
159	Asteronyx~sp~TOH271-IE.2014.2048_IP_3s	Asteronychidae	Asteronyx	sp	TOH271-IE.2014.2048	MNHN IE.2014.2048	0	0	44881	1428	810	IP	808.5	20.27	116.13	857
160	Asteroporpa~annulata~UF11629_WA_3	Gorgonocephalidae	Asteroporpa	annulata	UF11629	UF 11629	0	0	45966	1431	0	WA	98.5	28.35	275.08	968
161	Asteroporpa~australiensis~73011_NZ_3	Gorgonocephalidae	Asteroporpa	australiensis	73011	NIWA 73011	0	0	45210	1428	0	NZ	79.5	-34.28	172.86	967
163	Asteroporpa~indicus~F162660_IP_3	Gorgonocephalidae	Asteroporpa	indicus	F162660	MV F162660	0	0	45957	1431	0	IP	103	-16.75	121.04	965
165	Asteroporpa~reticulata~F99693_IP_3	Gorgonocephalidae	Asteroporpa	reticulata	F99693	MV F99693	1	0	45921	1428	0	IP	113	-28.9	167.68	966
168	Asteroschema~bidwillae~MVF188856_NZ_3s	Euryalidae	Asteroschema	bidwillae	MVF188856	MV F188856	0	0	41830	1431	995	NZ	1137	-36.32	178.047	902
173	Asteroschema~migrator~BP03_IP_3	Euryalidae	Asteroschema	migrator	BP03	MNHN IE.2007.2848	0	0	45846	1431	0	IP	300	-2.17	147.28	892
177	Asteroschema~tubiferum~MVF188857_NZ_3s	Euryalidae	Asteroschema	tubiferum	MVF188857	MV F188857	0	0	39050	1431	995	NZ	1418	-36.316	178.051	904
179	Astracme~mucronata~UF11067_WA_3	Gorgonocephalidae	Astracme	mucronata	UF11067	UF 11067	1	0	45807	1431	0	WA	205	26.15	279.96	949
181	Astroboa~nigrofurcata~F112098.2_IP_3	Gorgonocephalidae	Astroboa	nigrofurcata	F112098.2	MV F112098	0	0	37442	1428	0	IP	133	-21.944	113.841	962
183	Astroboa~nuda~F162680_IP_3	Gorgonocephalidae	Astroboa	nuda	F162680	MV F162680	0	0	45553	1377	486	IP	400	-12.48	123.41	957
185	Astrobrachion~adhaerens~F193501_IP_3	Euryalidae	Astrobrachion	adhaerens	F193501	MV F193501	0	0	43045	1431	0	IP	25.5	-13.82	127.26	885
186	Astrobrachion~constrictum~72995_NZ_3	Euryalidae	Astrobrachion	constrictum	72995	NIWA 72995	1	0	44379	1431	0	NZ	171	-34.26	173.02	883
188	Astroceras~cf.pergamenum~F112090_IP_3	Euryalidae	Astroceras	cf.pergamenum	F112090	MV F112090	0	0	45154	1431	0	IP	407.5	-29.86	114.38	877
190	Astroceras~elegans~F99757_NZ_3	Euryalidae	Astroceras	elegans	F99757	MV F99757	0	0	44267	1428	0	NZ	256.5	-33.75	167.28	871
191	Astroceras~mammosum~F162656_IP_3	Euryalidae	Astroceras	mammosum	F162656	MV F162656	0	0	41150	1410	0	IP	103	-16.75	121.04	872
193	Astroceras~pleiades~F99698_AU_3	Euryalidae	Astroceras	pleiades	F99698	MV F99698	1	0	45044	1419	0	AU	78.5	-31.87	159.24	875
195	Astrochalcis~tuberculosus~F171228_IP_3	Gorgonocephalidae	Astrochalcis	tuberculosus	F171228	MV F171228	0	0	45608	1428	0	IP	65	-11.71	129.84	955
196	Astrocharis~ijimai~BP04_IP_3	Euryalidae	Astrocharis	ijimai	BP04	MNHN IE.2007.2810	1	0	45362	1431	0	IP	616.5	-6.02	147.58	886
198	Astrochlamys~bruneus~F168811_AN_3s	Gorgonocephalidae	Astrochlamys	bruneus	F168811	MV F168811	0	0	45795	1419	989	AN	259.5	-61.01	315.1	927
200	Astrochlamys~sol~F168807_AN_3	Gorgonocephalidae	Astrochlamys	sol	F168807	MV F168807	1	0	45965	1419	0	AN	728	-62.58	306.22	928
201	Astrocladus~euryale~A82564_SA_3	Gorgonocephalidae	Astrocladus	euryale	A82564	SAMC MB-A82564	0	0	45381	1419	0	SA	254	-34.88	18.57	950
202	Astrocladus~exiguus~F162676_IP_3	Gorgonocephalidae	Astrocladus	exiguus	F162676	MV F162676	0	0	45763	1431	0	IP	96	-12.44	123.6	954
204	Astrocladus~hirtus~IE.2007.4306_IN_3	Gorgonocephalidae	Astrocladus	hirtus	IE.2007.4306	MNHN IE.2007.4306	0	0	45575	1428	0	IN	76	-25.19	47.2	961
208	Astrodia~sp~F168743_AU_3	Asteronychidae	Astrodia	sp	F168743	MV F168743	1	0	45296	1419	0	AU	1636	-44.38	147.25	851
209	Astrodia~tenuispina~F227633_AU_3	Asteronychidae	Astrodia	tenuispina	F227633	MV F227633	0	0	44758	1431	0	AU	2727	-34.07	129.18	854
211	Astrogomphus~vallatus~UF9002_WA_3s	Gorgonocephalidae	Astrogomphus	vallatus	UF9002	UF 9002	1	0	45924	1431	990	WA	230	24.28	278.48	969
212	Astrogymnotes~irimurai~Tania17-05_IP_3	Ophioplocidae	Astrogymnotes	irimurai	Tania17-05	NSMT E6717	0	0	44864	1431	0	IP	24.9	26.66	127.84	350
213	Astrogymnotes~thomasinae~J24842_NZ_3	Ophioplocidae	Astrogymnotes	thomasinae	J24842	AM J24842	1	0	41279	1431	0	NZ	31	-30.22	181.56	349
214	Astrohamma~tuberculatum~F168810_AN_3s	Gorgonocephalidae	Astrohamma	tuberculatum	F168810	MV F168810	1	0	45713	1413	989	AN	259.5	-61.01	315.1	924
215	Astroniwa~nukurangi~NIWA42491_NZ_3	Gorgonocephalidae	Astroniwa	nukurangi	NIWA42491	NIWA 42491	1	0	45810	1410	0	NZ	1019	-49.78	175.87	925
216	Astrophiura~permira~F159663_IP_3	Astrophiuridae	Astrophiura	permira	F159663	MV F159663	1	0	44712	1431	0	IP	514	-26.78	159.45	1025
217	Astrophyton~muricatum~UF12791_WA_3	Gorgonocephalidae	Astrophyton	muricatum	UF12791	UF 12791	0	0	45825	1431	0	WA	20	16.42	298.45	970
218	Astrosierra~amblyconus~F92996_AU_3	Gorgonocephalidae	Astrosierra	amblyconus	F92996	MV F92996	0	0	45958	1431	0	AU	117	-37.31	150.23	947
219	Astrosierra~microconus~F111584_AU_3	Gorgonocephalidae	Astrosierra	microconus	F111584	MV F111584	1	0	45964	1431	0	AU	96.5	-33.98	114.73	946
222	Astrothamnus~mindanaensis~F162667_IP_3	Gorgonocephalidae	Astrothamnus	mindanaensis	F162667	MV F162667	0	0	45574	1431	0	IP	390	-13.26	123.37	915
226	Astrothorax~waitei~F188858_NZ_3	Gorgonocephalidae	Astrothorax	waitei	F188858	MV F188858	1	0	45933	1428	0	NZ	856	-36.45	177.83	944
227	Astrothorax~waitei~A88427_SA_3	Gorgonocephalidae	Astrothorax	waitei	A88427	SAMC MB-A88427	0	0	42561	1431	0	SA	172	-36.55	20.61	942
229	Astrothrombus~rigens~TOH278-IE.2007.4368_IN_3	Gorgonocephalidae	Astrothrombus	rigens	TOH278-IE.2007.4368	MNHN IE.2007.4368	0	0	45681	1428	0	IN	730.5	-25.71	44.4	919
230	Astrothrombus~rugosus~F146210_AU_3s	Gorgonocephalidae	Astrothrombus	rugosus	F146210	MV F146210	1	0	45828	1431	993	AU	625	-43.92	150.46	917
232	Astrothrombus~vecors~F99707_NZ_3s	Gorgonocephalidae	Astrothrombus	vecors	F99707	MV F99707	0	0	45768	1428	503	NZ	497.5	-33.39	170.19	916
233	Astrotoma~agassizii~F168816_AN_3s	Gorgonocephalidae	Astrotoma	agassizii	F168816	MV F168816	0	0	45809	1419	989	AN	728	-62.58	306.22	922
234	Astrotoma~agassizii~A83260_SK_3s	Gorgonocephalidae	Astrotoma	agassizii	A83260	SAMC MB-A83260	0	0	45843	1428	989	SK	298	-46.74	38.06	921
237	Bathypectinura~heros~IE.2007.444_IN_3s	Ophiodermatidae	Bathypectinura	heros	IE.2007.444	MNHN IE.2007.444	0	0	45675	1410	986	IN	720	-15.53	45.72	739
238	Bathypectinura~heros~BP13_IP_3s	Ophiodermatidae	Bathypectinura	heros	BP13	MNHN IE.2007.2799	1	0	45944	1410	986	IP	813	-4.67	151.55	736
239	Bathypectinura~heros~MVF188876_NZ_3s	Ophiodermatidae	Bathypectinura	heros	MVF188876	MV F188876	0	0	42247	1431	986	NZ	709.5	-37.382	178.038	737
240	Clarkcoma~bollonsi~CB3a_NZ_3s	Clarkcomidae	Clarkcoma	bollonsi	CB3a	NIWA 74592	1	0	45959	1428	984	NZ	169	-46.77	167.46	587
241	Clarkcoma~bollonsi.AUST~CBAL1a_AU_3s	Clarkcomidae	Clarkcoma	bollonsi.AUST	CBAL1a	MV F111171	0	0	45920	1428	984	AU	179	-35.35	118.29	588
242	Clarkcoma~canaliculata.A~CCAPS1a_AU_3	Clarkcomidae	Clarkcoma	canaliculata.A	CCAPS1a	MV F210842	0	0	45981	1419	0	AU	3.5	-38.31	144.71	591
243	Clarkcoma~canaliculata.B~CCMR4a_AU_3s	Clarkcomidae	Clarkcoma	canaliculata.B	CCMR4a	MV F210890	1	0	45972	1419	984	AU	1.5	-35.09	117.94	592
244	Clarkcoma~canaliculata.C~CCEW4a_AU_3	Clarkcomidae	Clarkcoma	canaliculata.C	CCEW4a	MV F210834	0	0	45979	1419	0	AU	4.55	-33.85	121.9	593
245	Clarkcoma~canaliculata.D~CCKM9a_AU_3s	Clarkcomidae	Clarkcoma	canaliculata.D	CCKM9a	MV F210830	0	0	45984	1419	631	AU	3.5	-34.66	150.86	594
246	Clarkcoma~cf.bollonsi~CBKD1a_IP_3	Clarkcomidae	Clarkcoma	cf.bollonsi	CBKD1a	AM	0	0	45961	1419	0	IP	21	-29.27	182.07	586
247	Clarkcoma~pulchra~CPED4a_AU_3	Clarkcomidae	Clarkcoma	pulchra	CPED4a	MV F210910	0	0	45971	1419	0	AU	2	-37.07	149.91	590
248	Conocladus~australis~F188853_AU_3	Gorgonocephalidae	Conocladus	australis	F188853	MV F188853	0	0	45927	1419	0	AU	28	na	na	948
249	Cryptopelta~aster~A73814_SA_3	Ophiodermatidae	Cryptopelta	aster	A73814	SAMC MB-A73814	0	0	45821	1428	0	SA	103	-34.39	23.12	699
250	Cryptopelta~granulifera~UF9539_IP_3s	Ophiodermatidae	Cryptopelta	granulifera	UF9539	UF 9539	0	0	44394	1431	539	IP	1.5	-22.49	113.72	700
251	Cryptopelta~longibrachialis~UF10646_IP_3	Ophiodermatidae	Cryptopelta	longibrachialis	UF10646	UF 10646	0	0	45703	1431	0	IP	20	26.44	127.71	701
252	Cryptopelta~tarltoni~77917_NZ_3	Ophiodermatidae	Cryptopelta	tarltoni	77917	NIWA 77917	1	0	45683	1431	0	NZ	82	-37.62	178.92	702
253	Dictenophiura~ctenophora~IE.2007.5404_IP_3	Ophiopyrgidae	Dictenophiura	ctenophora	IE.2007.5404	MNHN IE.2007.5404	0	0	44568	1428	0	IP	309.5	-20.77	160.97	1068
254	Dictenophiura~platyacantha~F157375_IP_3	Ophiopyrgidae	Dictenophiura	platyacantha	F157375	MV F157375	1	0	45726	1428	0	IP	290	-26.73	159.42	1069
255	Dictenophiura~spMoV5499~F111985_IP_3	Ophiopyrgidae	Dictenophiura	spMoV5499	F111985	MV F111985	0	0	45226	1431	0	IP	400	-24.55	112.25	1063
256	Dictenophiura~stellata~F193496_IP_3	Ophiopyrgidae	Dictenophiura	stellata	F193496	MV F193496	0	0	43306	1431	0	IP	45	-13.85	127.28	1067
257	Diopederma~daniana~TIM017_EP_3	Ophiodermatidae	Diopederma	daniana	TIM017	UNAM-ICML 3.25.11	0	0	45713	1419	0	EP	38.7	16.11	265.05	715
258	Dougaloplus~echinatus~10001087_IP_3	Amphiuridae	Dougaloplus	echinatus	10001087	MV F228007	0	0	28353	1425	0	IP	46.2	-15.27	124.36	82
259	Euryale~aspera~KGR28002_IP_3	Euryalidae	Euryale	aspera	KGR28002	WAM	0	0	43834	1431	0	IP	55	-13.79	127.24	865
260	Euvondrea~floretta~2009.6692_AN_3s	Ophiopyrgidae	Euvondrea	floretta	2009.67	MNHN IE.2009.6692	0	0	45905	1428	986	AN	1189	-65.44	139.31	1152
264	Glaciacantha~dubium~F144887_AU_3	Ophiopyrgidae	Glaciacantha	dubium	F144887	MV F144887	0	0	41765	1431	0	AU	1250	-44.24	146.16	1134
265	Glaciacantha~sp~BMNHa_SK_3s	Ophiopyrgidae	Glaciacantha	sp	BMNHa	BMNH	0	0	38983	1431	986	SK	740	-41.363	42.915	1136
268	Glaciacantha~spMoV6630~F227356_AU_3	Ophiopyrgidae	Glaciacantha	spMoV6630	F227356	MV F227356	0	0	45242	1428	0	AU	2028	-44.32	147.31	1138
272	Gorgonocephalus~chilensis~NIWA40048_NZ_3	Gorgonocephalidae	Gorgonocephalus	chilensis	NIWA40048	NIWA 40048	0	0	45768	1428	0	NZ	443.5	-51.04	162.01	935
276	Gorgonocephalus~pustulatum~MVF188859_NZ_3s	Gorgonocephalidae	Gorgonocephalus	pustulatum	MVF188859	MV F188859	0	0	41465	1431	989	NZ	695.5	-37.169	176.659	940
277	Gorgonocephalus~pustulatum~A88409_SA_3s	Gorgonocephalidae	Gorgonocephalus	pustulatum	A88409	SAMC MB-A88409	0	0	45720	1425	989	SA	451	-35.13	23.15	938
278	Gorgonocephalus~sundanus~F162682_IP_3	Gorgonocephalidae	Gorgonocephalus	sundanus	F162682	MV F162682	1	0	45818	1428	0	IP	389.35	-14.81	121.45	937
279	Gymnolophus~obscura~F211059_IP_3	Ophiotrichidae	Gymnolophus	obscura	F211059	MV F211059	1	0	44428	1422	0	IP	25	-20.76	115.77	211
280	Hemipholis~cordifera~UF13139_WA_3	Ophiactidae	Hemipholis	cordifera	UF13139	UF 13139	1	0	42556	1431	0	WA	0.5	29.13	276.96	141
281	Histampica~duplicata~NA064.004.07.A_EP_3s	Ophiothamnidae	Histampica	duplicata	NA064.004.07.A		1	0	42099	1431	990	EP	1156	1.21413	268.91	126
282	Histampica~duplicata~IE.2007.4176_IN_3s	Ophiothamnidae	Histampica	duplicata	IE.2007.4176	MNHN IE.2007.4176	0	0	37880	1353	990	IN	621	-25.6	46.35	127
283	Histampica~duplicata~TANIA657_WA_3s	Ophiothamnidae	Histampica	duplicata	TANIA657	UNAM-ICML	0	0	42630	1431	990	WA	na	na	na	128
285	Macrophiothrix~caenosa~F193504_IP_3	Ophiotrichidae	Macrophiothrix	caenosa	F193504	MV F193504	0	0	45630	1404	0	IP	73	-13.81	127.32	182
286	Macrophiothrix~demessa~Aliwah11_SA_3	Ophiotrichidae	Macrophiothrix	demessa	Aliwah11	MV F222697	0	0	44854	1431	0	SA	14.5	-30.26	30.81	164
287	Macrophiothrix~expedita~SBD012761_IP_3	Ophiotrichidae	Macrophiothrix	expedita	SBD012761	MTQ SBD012761	0	0	45650	1431	0	IP	41.1	-21.15	151.82	176
288	Macrophiothrix~hirsuta~7.4082_IN_3	Ophiotrichidae	Macrophiothrix	hirsuta	7.4082	MNHN IE.2007.4082	0	0	44988	1419	0	IN	37.5	-25.65	44.88	185
291	Macrophiothrix~lineocaerulea~KGR28010_IP_3	Ophiotrichidae	Macrophiothrix	lineocaerulea	KGR28010	WAM	0	0	45174	1431	0	IP	55	-13.79	127.24	179
293	Macrophiothrix~longipeda~F193454_IP_3	Ophiotrichidae	Macrophiothrix	longipeda	F193454	MV F193454	0	0	45467	1431	0	IP	61.7	-10.96	136.8	170
296	Macrophiothrix~megapoma~F193499_IP_3	Ophiotrichidae	Macrophiothrix	megapoma	F193499	MV F193499	1	0	45542	1431	0	IP	41	-13.89	127.34	177
297	Macrophiothrix~melanosticta~KGR29374_IP_3	Ophiotrichidae	Macrophiothrix	melanosticta	KGR29374	WAM	0	0	45362	1419	0	IP	73	-13.81	127.32	180
298	Macrophiothrix~microplax~F109875_IP_3	Ophiotrichidae	Macrophiothrix	microplax	F109875	MV F109875	0	0	36008	1404	0	IP	0.5	-19.15	146.7	183
299	Macrophiothrix~nereidina~F193448_IP_3	Ophiotrichidae	Macrophiothrix	nereidina	F193448	MV F193448	0	0	45204	444	0	IP	45.5	-12.08	127.42	172
300	Macrophiothrix~obtusa~F193461_IP_3s	Ophiotrichidae	Macrophiothrix	obtusa	F193461	MV F193461	0	0	45536	1431	716	IP	100.8	-10.961	136.795	189
301	Macrophiothrix~paucispina~10000155_IP_3	Ophiotrichidae	Macrophiothrix	paucispina	10000155	MV F228005	0	0	40514	1422	0	IP	25.9	-15.39	124.28	181
303	Macrophiothrix~propinqua~Aliwah16_SA_3	Ophiotrichidae	Macrophiothrix	propinqua	Aliwah16	MV F222700	0	0	18342	1416	0	SA	14.5	-30.26	30.81	188
305	Macrophiothrix~striolata~F193460_IP_3	Ophiotrichidae	Macrophiothrix	striolata	F193460	MV F193460	0	0	41181	1431	0	IP	100.8	-10.96	136.79	178
306	Macrophiothrix~variabilis~KGR29917_IP_3	Ophiotrichidae	Macrophiothrix	variabilis	KGR29917	WAM	0	0	41691	1419	0	IP	0.5	-13.819	127.282	186
307	Microphiopholis~atra~UF13138_WA_3	Amphiuridae	Microphiopholis	atra	UF13138	UF 13138	1	0	43918	1431	0	WA	0.5	29.13	276.96	106
308	Microphiopholis~gracillima~MVF193482_WA_3s	Amphiuridae	Microphiopholis	gracillima	MVF193482	MV F193482	0	0	41747	1427	987	WA	0.5	29.147	276.963	108
309	Neoplax~ophiodes~UF6535_IN_3	Ophiomyxidae	Neoplax	ophiodes	UF6535	UF 6535	1	0	45658	1419	492	IN	14.5	-21.15	55.28	785
310	Neoplax~ophiodes~SBD019557_IP_3s	Ophiomyxidae	Neoplax	ophiodes	SBD019557	MTQ SBD019557	0	0	45009	1431	986	IP	24.3	-11.9337	143.777	784
311	Ophiacantha~abyssicola~F214043_AR_3s	Ophiacanthidae	Ophiacantha	abyssicola	F214043	MV F214043	0	0	44247	1407	688	AR	236	70.11	18.03	496
312	Ophiacantha~alternata~F173963_AU_3	Ophiacanthidae	Ophiacantha	alternata	F173963	MV F173963	1	0	44909	1404	0	AU	0.5	-38.48	145.03	458
313	Ophiacantha~antarctica~F168812_AN_3s	Ophiacanthidae	Ophiacantha	antarctica	F168812	MV F168812	1	0	45646	1410	986	AN	259.5	-61.01	315.1	511
315	Ophiacantha~brachygnatha.A~F227960_AU_3	Ophiacanthidae	Ophiacantha	brachygnatha.A	F227960	MV F227960	0	0	43301	1413	0	AU	400	-33.52	131.13	499
316	Ophiacantha~brachygnatha.B~F146257_AU_3	Ophiacanthidae	Ophiacantha	brachygnatha.B	F146257	MV F146257	0	0	44906	1116	0	AU	900	-44.12	147.24	501
317	Ophiacantha~brachygnatha.C~F227369_AU_3s	Ophiacanthidae	Ophiacantha	brachygnatha.C	F227369	MV F227369	0	0	41682	1404	986	AU	2028	-44.32	147.31	503
319	Ophiacantha~cf.vivipara.A~F171164_AN_3	Ophiacanthidae	Ophiacantha	cf.vivipara.A	F171164	MV F171164	1	0	45658	1428	0	AN	211.5	-60.6	315.65	486
323	Ophiacantha~contigua~NA064.017.03.A_EP_3	Ophiotretidae	Ophiacantha	contigua	NA064.017.03.A		0	0	45901	1419	0	EP	354	1.23132	268.887	600
324	Ophiacantha~cosmica~CAS161431_AN_3s	Ophiacanthidae	Ophiacantha	cosmica	CAS161431	CAS 161431	1	0	45508	1132	987	AN	4544.5	-62.96	332.13	541
325	Ophiacantha~cosmica~F239745_AU_3s	Ophiacanthidae	Ophiacantha	cosmica	F239745	MV F239745	0	0	45700	783	987	AU	4126.5	-40.47	149.39	542
326	Ophiacantha~cosmica~F214066_NWP_3s	Ophiacanthidae	Ophiacantha	cosmica	F214066	MV F214066	0	0	45621	1243	987	NWP	5420.5	43.97	157.32	539
327	Ophiacantha~densispina~F144731_AU_3	Ophiacanthidae	Ophiacantha	densispina	F144731	MV F144731	0	0	45815	1428	0	AU	1150	-44.32	147.11	479
328	Ophiacantha~duplex~F168001_IP_3s	Ophiacanthidae	Ophiacantha	duplex	F168001	MV F168001	1	0	45133	1304	985	IP	695.9	-14.612	121.318	555
329	Ophiacantha~fidelis~F99714_NZ_3	Ophiacanthidae	Ophiacantha	fidelis	F99714	MV F99714	0	0	41354	902	0	NZ	527	-33.37	170.21	500
331	Ophiacantha~frigida~CAS161460_SM_3	Ophiacanthidae	Ophiacantha	frigida	CAS161460	CAS 161460	1	0	45277	1125	0	SM	2951.5	-58.26	335.1	543
333	Ophiacantha~funebris~MVF188863_NZ_3s	Ophiacanthidae	Ophiacantha	funebris	MVF188863	MV F188863	0	0	37721	1428	985	NZ	915	-36.447	177.838	470
334	Ophiacantha~imago~TOH92-IE.2013.16281_SK_3	Ophiacanthidae	Ophiacantha	imago	TOH92-IE.2013.16281	MNHN IE.2013.16281	0	0	39094	993	0	SK	12.5	-49.28	69.71	517
335	Ophiacantha~indica~F193489_IP_3	Ophiacanthidae	Ophiacantha	indica	F193489	MV F193489	0	0	44665	1431	0	IP	41	-13.89	127.34	457
336	Ophiacantha~levispina~1264_IP_3	Ophiacanthidae	Ophiacantha	levispina	1264	MNHN IE.2012.1264	0	0	45506	1169	0	IP	876	22.19	120.04	547
338	Ophiacantha~longidens~F162721_IP_3	Ophiacanthidae	Ophiacantha	longidens	F162721	MV F162721	0	0	45116	1425	0	IP	400	-13.22	123.39	463
339	Ophiacantha~opulenta~CAS161433_AN_3	Ophiacanthidae	Ophiacantha	opulenta	CAS161433	CAS 161433	0	0	45130	1416	0	AN	2085.5	-65.29	306.61	523
340	Ophiacantha~otagoensis~NIWA40089_NZ_3	Ophiacanthidae	Ophiacantha	otagoensis	NIWA40089	NIWA 40089	0	0	43460	1425	0	NZ	455	-52.48	160.41	498
341	Ophiacantha~pacata~F227627_AU_3	Ophiacanthidae	Ophiacantha	pacata	F227627	MV F227627	0	0	31776	1410	0	AU	1331.5	-34.77	131.73	557
342	Ophiacantha~pentactis~2009.655_AN_3	Ophiacanthidae	Ophiacantha	pentactis	2009.65	MNHN IE.2009.6550	0	0	45632	1428	0	AN	356	-65.91	143.96	484
343	Ophiacantha~pentagona~IE.2007.7147_IP_3	Ophiacanthidae	Ophiacantha	pentagona	IE.2007.7147	MNHN IE.2007.7147	0	0	42549	1272	0	IP	405	-18.59	164.39	497
344	Ophiacantha~placida~IE.2007.7501_IP_3	Ophiacanthidae	Ophiacantha	placida	IE.2007.7501	MNHN IE.2007.7501	0	0	41571	1413	0	IP	394.5	-19.55	158.67	488
345	Ophiacantha~quadrispina~NA064.015.05.A_EP_3	Ophiotretidae	Ophiacantha	quadrispina	NA064.015.05.A		0	0	45792	1428	0	EP	376	1.22714	268.889	621
346	Ophiacantha~richeri~NIWA95821_NZ_3	Ophiacanthidae	Ophiacantha	richeri	NIWA95821	NIWA 95821	1	0	44931	1119	0	NZ	1402.5	-35.31	189.54	502
347	Ophiacantha~rosea~F227333_AU_3s	Ophiacanthidae	Ophiacantha	rosea	F227333	MV F227333	0	0	45257	1428	985	AU	455	-44.05	147.4	472
348	Ophiacantha~rosea1~F168695_AU_3s	Ophiacanthidae	Ophiacantha	rosea1	F168695	MV F168695	0	0	45852	1428	974	AU	2047	-44.38	147.27	480
350	Ophiacantha~rosea5~IE.2007.6759_IP_3s	Ophiacanthidae	Ophiacantha	rosea5	IE.2007.6759	MNHN IE.2007.6759	0	0	45273	1428	985	IP	800	-22.4	171.78	471
351	Ophiacantha~serrata~IE.2013.6138_IP_3	Ophiacanthidae	Ophiacantha	serrata	IE.2013.6138	MNHN IE.2013.6138	0	0	45600	903	0	IP	330.5	-21.12	158.63	525
352	Ophiacantha~similis~NA064.017.04.A_EP_3	Ophiacanthidae	Ophiacantha	similis	NA064.017.04.A		0	0	45420	1359	0	EP	354	1.23132	268.887	510
353	Ophiacantha~sollicita~F239940_AU_3s	Ophiacanthidae	Ophiacantha	sollicita	F239940	MV F239940	0	0	45602	1404	985	AU	2643	-35.33	151.25	546
354	Ophiacantha~sollicita~13979_NZ_1s	Ophiacanthidae	Ophiacantha	sollicita	13979	NIWA 13979	0	0	44001	0	985	NZ	2538	-39.37	179.84	544
355	Ophiacantha~spectabilis~F168787_AR_3	Ophiotretidae	Ophiacantha	spectabilis	F168787	MV F168787	0	0	45952	1419	476	AR	225	70.27	22.47	613
356	Ophiacantha~spectabilis~F159781_AU_3s	Ophiotretidae	Ophiacantha	spectabilis	F159781	MV F159781	0	0	45959	1419	985	AU	1250	-44.26	147.23	612
357	Ophiacantha~spectabilis~NIWA42250.3_NZ_3s	Ophiotretidae	Ophiacantha	spectabilis	NIWA42250.3	NIWA 42250	0	0	45964	1419	985	NZ	1050	-42.763	180.075	614
359	Ophiacantha~spMoV2780~F144774_AU_3s	Ophiacanthidae	Ophiacantha	spMoV2780	F144774	MV F144774	0	0	45905	1425	986	AU	1225	-44.23	147.47	520
360	Ophiacantha~spMoV4532~F168093_AU_3s	Ophiacanthidae	Ophiacantha	spMoV4532	F168093	MV F168093	0	0	45643	775	615	AU	1460	-44.32	147.26	561
362	Ophiacantha~spMoV4533~F227355_AU_3s	Ophiacanthidae	Ophiacantha	spMoV4533	F227355	MV F227355	0	0	44998	1416	985	AU	2028	-44.32	147.31	552
363	Ophiacantha~spMoV4536~F168083_AU_3	Ophiacanthidae	Ophiacantha	spMoV4536	F168083	MV F168083	0	0	45809	1410	0	AU	1452	-44.29	147.39	522
364	Ophiacantha~spMoV4537~F146266_AU_3	Ophiacanthidae	Ophiacantha	spMoV4537	F146266	MV F146266	0	0	45731	1428	0	AU	1150	-44.32	147.11	474
365	Ophiacantha~spMoV4537~NIWA9.9_NZ_3	Ophiacanthidae	Ophiacantha	spMoV4537	NIWA9.9	NIWA	0	0	20771	1119	0	NZ	1050	-42.763	180.075	475
368	Ophiacantha~striolata~IE.2012.1134_IN_3	Ophiacanthidae	Ophiacantha	striolata	IE.2012.1134	MNHN IE.2012.1134	0	0	45602	1410	0	IN	306.5	-26.13	45.65	468
370	Ophiacantha~vepratica~82747_NZ_3	Ophiacanthidae	Ophiacantha	vepratica	82747	NIWA 82747	1	0	45643	1311	0	NZ	918.5	-36.8	177.46	467
371	Ophiacantha~vilis~NIWA63927_NZ_3s	Ophiacanthidae	Ophiacantha	vilis	NIWA63927	NIWA 63927	0	0	45112	1425	985	NZ	1427.5	-42.13	174.54	553
372	Ophiacantha~vivipara~TM01_SK_3	Ophiacanthidae	Ophiacantha	vivipara	TM01	SAMC	0	0	45734	1428	0	SK	180	-46.8	38.06	476
374	Ophiacantha~vivipara.A~F167520_SK_3	Ophiacanthidae	Ophiacantha	vivipara.A	F167520	MV F167520	0	0	45646	1428	0	SK	169	-54.49	3.23	487
375	Ophiacantha~vivipara.B~40941_NZ_3	Ophiacanthidae	Ophiacantha	vivipara.B	40941	NIWA 40941	0	0	45825	1428	0	NZ	713	-56.24	158.5	478
376	Ophiacantha~vivipara.C~F168082_AU_3	Ophiacanthidae	Ophiacantha	vivipara.C	F168082	MV F168082	0	0	45847	1428	0	AU	1430	-44.29	147.39	481
377	Ophiacantha~vivipara.C~43073_NZ_3	Ophiacanthidae	Ophiacantha	vivipara.C	43073	NIWA 43073	0	0	45837	1428	0	NZ	1242.5	-50.09	163.48	482
378	Ophiacantha~vorax~BP40_IP_3	Ophiacanthidae	Ophiacantha	vorax	BP40	MNHN	0	0	45312	1425	0	IP	852.5	-2.68	150.05	554
380	Ophiacantha~yaldwyni~72089_NZ_3s	Ophiacanthidae	Ophiacantha	yaldwyni	72089	NIWA 72089	1	0	45686	1401	986	NZ	1579.5	-36.5	177.87	514
381	Ophiacanthidae~gen.nov~DW1815.1_IP_3	na1	Ophiacanthidae	gen.nov	DW1815.1	MNHN	1	0	41270	1419	0	IP	350	-9.785	160.908	802
385	Ophiactis~abyssicola.abyssicola~OAB1_SA_3	Ophiactidae	Ophiactis	abyssicola.abyssicola	OAB1	BMNH	0	0	45621	1428	0	SA	1110	-32.71	57.24	257
386	Ophiactis~abyssicola.cuspidata~F168157_AU_3s	Ophiactidae	Ophiactis	abyssicola.cuspidata	F168157	MV F168157	1	0	45529	1428	999	AU	1557	-44.29	147.39	251
388	Ophiactis~abyssicola.cuspidata~MVF188874_NZ_3s	Ophiactidae	Ophiactis	abyssicola.cuspidata	MVF188874	MV F188874	0	0	44966	1431	999	NZ	1157.5	-36.79	177.454	253
389	Ophiactis~affinis~DW1818.1_IP_3	Ophiactidae	Ophiactis	affinis	DW1818.1	MNHN	0	0	42717	1422	0	IP	84	-9.867	160.862	137
390	Ophiactis~amator~F168705_AU_3s	Ophiactidae	Ophiactis	amator	F168705	MV F168705	0	0	45654	1428	999	AU	1997	-44.38	147.27	250
391	Ophiactis~amator~OAM1_NZ_3s	Ophiactidae	Ophiactis	amator	OAM1	NIWA 64929	0	0	45242	1428	999	NZ	3035	-35.49	178.52	249
392	Ophiactis~asperula~F167536_SM_3s	Ophiactidae	Ophiactis	asperula	F167536	MV F167536	1	0	45068	1431	998	SM	93	-52.11	301.92	248
393	Ophiactis~brachygenys~TIM031_IP_3	Ophiactidae	Ophiactis	brachygenys	TIM031	NSMT E5439	0	0	43252	1425	0	IP	502	28.66	127.03	143
394	Ophiactis~brevis~F193456_IP_3	Ophiactidae	Ophiactis	brevis	F193456	MV F193456	0	0	45654	1419	0	IP	27.8	-11.22	134.75	265
395	Ophiactis~carnea~A73896_SA_3	Ophiactidae	Ophiactis	carnea	A73896	SAMC MB-A73896	0	0	43334	1425	0	SA	99	-34.02	25.72	138
396	Ophiactis~definita~ODF18a_IP_3	Ophiactidae	Ophiactis	definita	ODF18a	MNHN IE.2012.641	0	0	44617	1425	0	IP	498.5	-4.1	151.93	144
397	Ophiactis~delagoa~TOH247-IE.2014.2002_IN_3	Ophiactidae	Ophiactis	delagoa	TOH247-IE.2014.2002	MNHN IE.2014.2002	0	0	45806	1422	0	IN	97.5	-25.98	44.72	267
398	Ophiactis~flexuosa~F99735_IP_3s	Ophiactidae	Ophiactis	flexuosa	F99735	MV F99735	0	0	41359	1425	529	IP	905	-29.22	159.01	146
399	Ophiactis~fuscolineata~10001237_IP_3s	Ophiactidae	Ophiactis	fuscolineata	10001237	MV F228004	0	0	38731	1425	988	IP	40.6	-15.26	124.27	135
400	Ophiactis~hemiteles~F109855_IP_3	Ophiactidae	Ophiactis	hemiteles	F109855	MV F109855	1	0	45887	1431	0	IP	10	-14.69	145.46	266
401	Ophiactis~hirta~F144831.2_AU_3	Ophiactidae	Ophiactis	hirta	F144831.2	MV F144831	1	0	45728	1425	0	AU	625	-43.922	150.465	260
403	Ophiactis~kroeyeri~TANIA242_EP_3s	Ophiactidae	Ophiactis	kroeyeri	TANIA242	CZA E002	0	0	42717	1425	990	EP	5	-13.22	283.7	139
405	Ophiactis~macrolepidota~F111930_IP_3	Ophiactidae	Ophiactis	macrolepidota	F111930	MV F111930	0	0	40500	1422	0	IP	181.5	-28.98	113.78	136
406	Ophiactis~maculosa~F193490_IP_3	Ophiactidae	Ophiactis	maculosa	F193490	MV F193490	1	0	42909	1431	0	IP	41	-13.89	127.34	134
407	Ophiactis~perplexa~F239714_AU_3s	Ophiactidae	Ophiactis	perplexa	F239714	MV F239714	0	0	44836	1425	518	AU	1225.5	-30.09	153.59	149
408	Ophiactis~perplexa~TOH269-IE.2014.2045_IP_3s	Ophiactidae	Ophiactis	perplexa	TOH269-IE.2014.2045	MNHN IE.2014.2045	0	0	44423	1425	518	IP	1668.5	21.62	118.3	148
409	Ophiactis~perplexa~OFL2_NZ_3s	Ophiactidae	Ophiactis	perplexa	OFL2	NIWA 81168	1	0	44299	1425	518	NZ	1295	-35.35	178.52	150
410	Ophiactis~picteti~IE.2007.4278_IN_3	Ophiactidae	Ophiactis	picteti	IE.2007.4278	MNHN IE.2007.4278	0	0	45837	1419	0	IN	100	-24.83	47.46	268
411	Ophiactis~plana~F144837_AU_3	Ophiactidae	Ophiactis	plana	F144837	MV F144837	0	0	44231	1431	0	AU	625	-43.92	150.46	152
412	Ophiactis~plana~BP12_IP_3	Ophiactidae	Ophiactis	plana	BP12	MNHN IE.2007.2866	0	0	44055	1431	0	IP	400.5	-6.9	147.08	145
413	Ophiactis~plana~OFL3a_NZ_3	Ophiactidae	Ophiactis	plana	OFL3a	NIWA 81169	0	0	44571	1425	0	NZ	1579.5	-36.5	177.87	147
414	Ophiactis~plana~OPR14_SK_3	Ophiactidae	Ophiactis	plana	OPR14	BMNH	0	0	44221	1419	0	SK	750	-41.37	42.9	151
415	Ophiactis~quinqueradia~UF11565_WA_3s	Ophiactidae	Ophiactis	quinqueradia	UF11565	UF 11565	0	0	45858	1428	898	WA	54.5	28.09	268.96	261
416	Ophiactis~resiliens~MVF214043_AU_3s	Ophiactidae	Ophiactis	resiliens	MVF214043	MV F214043	0	0	44082	1431	996	AU	1	-38.67	145.667	258
419	Ophiactis~savignyi~MVF193474_WA_3s	Ophiactidae	Ophiactis	savignyi	MVF193474	MV F193474	0	0	43626	1431	998	WA	3	26.783	279.956	262
420	Ophiactis~simplex~TIM011_EP_3	Ophiactidae	Ophiactis	simplex	TIM011	UNAM-ICML 3.30.61	0	0	40176	1425	0	EP	0.5	18.57	256.33	140
421	Ophiactis~tricolor~F168785_IP_3	Ophiactidae	Ophiactis	tricolor	F168785	MV F168785	1	0	44344	1431	0	IP	41.75	-23.95	113.43	142
422	Ophialcaea~tuberculosa~BP35_IP_3	Ophiacanthidae	Ophialcaea	tuberculosa	BP35	MNHN IE.2007.2850	1	0	45256	1208	0	IP	713	-4.07	151.83	551
423	Ophiambix~devaneyi~TANIA648_WA_3s	Ophioscolecidae2	Ophiambix	devaneyi	TANIA648	UNAM-ICML	0	0	35092	1419	715	WA	1095	na	na	807
424	Ophiambix~epicopus~IE.2009.2016_IP_3s	Ophioscolecidae2	Ophiambix	epicopus	IE.2009.2016	MNHN IE.2009.2016	1	0	37683	1428	997	IP	441	-15.7425	167.049	808
427	Ophiarachna~delicata~F109869_IP_3	Ophiomyxidae	Ophiarachna	delicata	F109869	MV F109869	0	0	45725	1419	0	IP	10	-14.69	145.46	789
428	Ophiarachna~incrassata~F93664_IP_3s	Ophiomyxidae	Ophiarachna	incrassata	F93664	MV F93664	0	0	45627	1419	984	IP	3.5	-12.27	123	791
429	Ophiarachna~megacantha~AM.J25579_IP_3	Ophiomyxidae	Ophiarachna	megacantha	AM.J25579	AM J25579	0	0	45254	1431	0	IP	13	-27.5736	215.632	792
430	Ophiarachna~quinquespinosa~TOH215-IE.2007.1880_IP_3	Ophiomyxidae	Ophiarachna	quinquespinosa	TOH215-IE.2007.1880	MNHN IE.2007.1880	0	0	19957	1428	0	IP	276	9.47	123.9	790
431	Ophiarachna~robillardi~IE.2007.4274_IN_3s	Ophiomyxidae	Ophiarachna	robillardi	IE.2007.4274	MNHN IE.2007.4274	0	0	45949	1419	986	IN	351	-25.61	46.3	794
432	Ophiarachna~robillardi~SBD036299_IP_3s	Ophiomyxidae	Ophiarachna	robillardi	SBD036299	MTQ SBD036299	0	0	39636	1431	986	IP	51.65	-20.65	150.95	793
434	Ophiarachnella~capensis~Aliwah6_SA_3s	Ophiodermatidae	Ophiarachnella	capensis	Aliwah6	MV F237919	0	0	45891	1419	986	SA	14.5	-30.26	30.81	728
435	Ophiarachnella~cf.gorgonia~IE.2007.7069_IP_3	Ophiodermatidae	Ophiarachnella	cf.gorgonia	IE.2007.7069	MNHN IE.2007.7069	0	0	45355	1419	0	IP	474.5	-22.35	171.64	735
436	Ophiarachnella~cf.infernalis~F159727_IP_3	Ophiopezidae	Ophiarachnella	cf.infernalis	F159727	MV F159727	1	0	45811	1431	0	IP	255	-21.01	114.65	740
438	Ophiarachnella~gorgonia~KGR29373_IP_3s	Ophiodermatidae	Ophiarachnella	gorgonia	KGR29373	WAM	0	0	45893	1431	986	IP	73	-13.81	127.32	729
439	Ophiarachnella~infernalis~Nagala1_IP_3	Ophiopezidae	Ophiarachnella	infernalis	Nagala1	MV F228006	0	0	44429	1428	0	IP	0.5	-15.9	124.34	753
440	Ophiarachnella~macracantha~SBD000545_IP_3	Ophiomyxidae	Ophiarachnella	macracantha	SBD000545	MTQ SBD000545	0	0	45370	1428	0	IP	33.8	-14.97	145.61	800
441	Ophiarachnella~paucigranula~F109826_IP_3	Ophiomyxidae	Ophiarachnella	paucigranula	F109826	MV F109826	0	0	45945	1431	0	IP	3.5	-14.68	145.47	799
442	Ophiarachnella~ramsayi~F188854_AU_3s	Ophiodermatidae	Ophiarachnella	ramsayi	F188854	MV F188854	0	0	45520	1419	986	AU	4.9	-35.58	138.6	731
444	Ophiarachnella~septemspinosa~F109828_IP_3	Ophiomyxidae	Ophiarachnella	septemspinosa	F109828	MV F109828	0	0	45900	1431	0	IP	2	-14.69	145.43	798
445	Ophiarachnella~septemspinosa~Aliwah7_SA_3	Ophiomyxidae	Ophiarachnella	septemspinosa	Aliwah7	MV F237920	0	0	45938	1428	0	SA	14.5	-30.26	30.81	795
446	Ophiarachnella~similis~F173957_IP_3	Ophiopezidae	Ophiarachnella	similis	F173957	MV F173957	0	0	45886	1410	0	IP	59.9	-10.95	136.79	745
447	Ophiarachnella~sphenisci~F193502_IP_3	Ophiopezidae	Ophiarachnella	sphenisci	F193502	MV F193502	0	0	45880	1419	0	IP	59	-13.79	127.27	751
448	Ophiarachnella~stabilis~F159731_IP_3	Ophiomyxidae	Ophiarachnella	stabilis	F159731	MV F159731	1	0	45945	1419	0	IP	96	-12.44	123.6	797
449	Ophiarthrum~elegans~F109816_IP_3	Ophiocomidae	Ophiarthrum	elegans	F109816	MV F109816	0	0	45301	1115	0	IP	3.5	-19.17	146.85	664
450	Ophiarthrum~pictum~F109815.2_IP_1	Ophiocomidae	Ophiarthrum	pictum	F109815.2	MV F109815	0	0	43278	0	0	IP	4.5	-14.662	145.447	665
451	Ophientrema~scolopendrica~F99743.2_NZ_3	Ophiacanthidae	Ophientrema	scolopendrica	F99743.2	MV F99743	0	0	36701	1431	0	NZ	1464.5	-33.708	167.45	562
452	Ophiernus~adspersus~BP17_IP_3s	Ophiernidae	Ophiernus	adspersus	BP17	MNHN	0	0	45831	1431	986	IP	813	-4.67	151.55	429
453	Ophiernus~adspersus~TANIA649_WA_3s	Ophiernidae	Ophiernus	adspersus	TANIA649	UNAM-ICML	0	0	45904	1416	533	WA	714	na	na	428
454	Ophiernus~vallincola~CAS161551_AN_3s	Ophiernidae	Ophiernus	vallincola	CAS161551	CAS 161551	0	0	45440	1416	703	AN	353.5	-60.96	304.88	427
455	Ophiernus~vallincola~F227611_AU_3s	Ophiernidae	Ophiernus	vallincola	F227611	MV F227611	0	0	45421	1416	703	AU	1015.5	-34.67	132.47	424
457	Ophiernus~vallincola~MVF188877_NZ_3s	Ophiernidae	Ophiernus	vallincola	MVF188877	MV F188877	1	0	43926	1431	986	NZ	1497.5	-36.924	176.98	425
458	Ophioblenna~antillensis~TANIA614_WA_3	Ophiomyxidae	Ophioblenna	antillensis	TANIA614	UNAM-ICML	0	0	45746	1428	0	WA	1.5	22.38	270.33	782
460	Ophiobyrsa~rudis~F222711_AU_3	Ophiobyrsidae	Ophiobyrsa	rudis	F222711	MV F222711	0	0	16979	1341	0	AU	168	-43.98	147.29	641
461	Ophiocamax~applicatus~F239936_AU_3s	Ophiacamacidae	Ophiocamax	applicatus	F239936	MV F239936	0	0	44038	1428	983	AU	1021	-32.47	152.99	638
462	Ophiocamax~applicatus~NIWA40060_NZ_3s	Ophiacamacidae	Ophiocamax	applicatus	NIWA40060	NIWA 40060	1	0	43155	1428	983	NZ	443.5	-51.04	162.01	639
463	Ophiocamax~drygalskii~CAS161526_SM_3	Ophiacamacidae	Ophiocamax	drygalskii	CAS161526	CAS 161526	0	0	41738	1428	0	SM	2373.5	-59.37	299.93	633
464	Ophiocamax~fasciculata~UF17029_WA_3	Ophiacamacidae	Ophiocamax	fasciculata	UF17029	UF 17029	0	0	43699	1428	500	WA	537	6.97	307.37	634
466	Ophiocamax~gigas~TOH239-IE.2011.435_SK_3	Ophiacamacidae	Ophiocamax	gigas	TOH239-IE.2011.435	MNHN IE.2011.435	0	0	43261	1428	469	SK	682.5	-47.18	66.08	635
467	Ophiocamax~gigas~PS143.2d_SM_3s	Ophiacamacidae	Ophiocamax	gigas	PS143.2d	CAS	0	0	41107	1428	983	SM	774	-58.739	334.825	636
469	Ophiocamax~vitrea~BP33_IP_3	Ophiacamacidae	Ophiocamax	vitrea	BP33	MNHN IE.2007.2840	1	0	43750	1431	0	IP	271	-4.32	152.32	632
470	Ophiocanops~felli~F99752_NZ_3	Ophiacanthidae	Ophiocanops	felli	F99752	MV F99752	1	0	45340	1308	0	NZ	272.5	-33.77	167.32	509
471	Ophiocentrus~aspera~F109833_IP_3	Amphiuridae	Ophiocentrus	aspera	F109833	MV F109833	1	0	45426	1425	0	IP	3	-14.69	145.43	17
472	Ophiocentrus~dilatata~F173948_IP_3	Amphiuridae	Ophiocentrus	dilatata	F173948	MV F173948	0	0	44714	1425	0	IP	66	-12.06	127.42	19
473	Ophiocentrus~inaequalis~F112029_IP_3	Amphiuridae	Ophiocentrus	inaequalis	F112029	MV F112029	0	0	45142	1425	0	IP	100	-25.9	112.82	16
474	Ophiocentrus~novaezelandiae~73620_NZ_3	Amphiuridae	Ophiocentrus	novaezelandiae	73620	NIWA 73620	1	0	45504	1431	0	NZ	263.5	-36.18	173.67	23
475	Ophiocentrus~pilosus~MVF173943_AU_3s	Amphiuridae	Ophiocentrus	pilosus	MVF173943	MV F173943	0	0	28238	1431	988	AU	6.5	-38.803	146.424	22
476	Ophiocentrus~putnami~F173881_IP_3	Amphiuridae	Ophiocentrus	putnami	F173881	MV F173881	0	0	45109	1431	0	IP	45.45	-12.3	129.98	20
477	Ophiocentrus~sp.nov~10006114_IP_3	Amphiuridae	Ophiocentrus	sp.nov	10006114	MV F241485	0	0	45247	1428	0	IP	54.75	-14	126	18
478	Ophiocentrus~verticillatus~UF14627_IP_3	Amphiuridae	Ophiocentrus	verticillatus	UF14627	UF 14627	0	0	45244	1431	0	IP	20	-5.2	145.8	21
479	Ophiochaeta~hirsuta~F93645_IP_3	Ophiopezidae	Ophiochaeta	hirsuta	F93645	MV F93645	1	0	45838	1410	483	IP	5	-12.21	123	748
480	Ophiochaeta~sp~UF16228_IN_3	Ophiopezidae	Ophiochaeta	sp	UF16228	UF 16228	0	0	45256	1410	0	IN	7	23.581	38.455	749
481	Ophiochasma~cf.stellata~F214063_IP_3s	Ophiodermatidae	Ophiochasma	cf.stellata	F214063	MV F214063	0	0	45869	1419	984	IP	30.8	-11.22	134.73	734
482	Ophiochasma~cf.stellata.2~F171183.2_IP_3	Ophiodermatidae	Ophiochasma	cf.stellata.2	F171183.2	MV F171183	0	0	45802	1419	0	IP	65	-11.714	129.842	730
483	Ophiochasma~stellata~F211069_IP_3s	Ophiodermatidae	Ophiochasma	stellata	F211069	MV F211069	1	0	45832	1419	986	IP	43.5	-20.36	116.41	732
484	Ophiochiton~fastigatus~BP14_IP_3	Ophionereididae	Ophiochiton	fastigatus	BP14	MNHN IE.2007.2812	1	0	45824	1431	0	IP	378	-5.37	145.8	371
486	Ophiochiton~lentus~IE.2013.2620_IP_3	Ophionereididae	Ophiochiton	lentus	IE.2013.2620	MNHN IE.2013.2620	0	0	45660	1419	0	IP	392	-20.33	158.72	370
487	Ophiochiton~spMoV4886~F99754_NZ_3	Ophionereididae	Ophiochiton	spMoV4886	F99754	MV F99754	0	0	45868	1428	0	NZ	1165	-34.04	171.13	363
488	Ophiochiton~ternispinus~TIM013_WA_3	Ophionereididae	Ophiochiton	ternispinus	TIM013	UNAM-ICML	0	0	45822	1419	0	WA	633	23.44	273.11	372
489	Ophiochondrus~stelliger~F171170_AN_3	Ophiacanthidae	Ophiochondrus	stelliger	F171170	MV F171170	0	0	45461	1388	497	AN	211.5	-60.609	315.657	550
490	Ophioclastus~hataii~SBD035814_IP_3s	Ophiomyxidae	Ophioclastus	hataii	SBD035814	MTQ SBD035814	0	0	44466	1431	949	IP	57.95	-19.4	149.68	757
491	Ophiocnemis~marmorata~TIM038_IP_3s	Ophiotrichidae	Ophiocnemis	marmorata	TIM038	NSMT E6511	0	0	43659	1431	990	IP	3	13.359	100.924	207
492	Ophiocoma~aethiops~TIM001_EP_3	Ophiocomidae	Ophiocoma	aethiops	TIM001	UNAM-ICML	0	0	44945	1431	0	EP	7	18.02	257.49	686
493	Ophiocoma~alexandri~F121078_EP_3	Ophiocomidae	Ophiocoma	alexandri	F121078	MV F121078	0	0	44821	1431	0	EP	1	8.97	280.33	679
495	Ophiocoma~brevipes~F109860_IP_3s	Ophiocomidae	Ophiocoma	brevipes	F109860	MV F109860	0	0	44800	1431	988	IP	2	-14.69	145.43	651
496	Ophiocoma~cf.dentata~emilie7_IN_3	Ophiocomidae	Ophiocoma	cf.dentata	emilie7		0	0	44482	1431	0	IN	1	-19.6648	63.4509	646
497	Ophiocoma~cf.erinaceus~emilie8_IN_3	Ophiocomidae	Ophiocoma	cf.erinaceus	emilie8		0	0	44707	1431	0	IN	1	-21.1835	55.2861	688
498	Ophiocoma~cf.macroplaca~F159725_IP_3	Ophiocomidae	Ophiocoma	cf.macroplaca	F159725	MV F159725	0	0	45295	1431	0	IP	110	-17.59	118.98	662
499	Ophiocoma~cynthiae~emilie3_IN_3	Ophiocomidae	Ophiocoma	cynthiae	emilie3		0	0	44946	1431	0	IN	1	-19.6648	63.4509	692
501	Ophiocoma~dentata~F109806_IP_3	Ophiocomidae	Ophiocoma	dentata	F109806	MV F109806	0	0	44530	1431	0	IP	1	-14.68	145.47	647
502	Ophiocoma~doederleini~7.4209_IN_3s	Ophiocomidae	Ophiocoma	doederleini	7.4209	MNHN IE.2007.4209	1	0	44634	1410	816	IN	40.5	-25.76	44.86	649
504	Ophiocoma~echinata~UF11738_WA_3s	Ophiocomidae	Ophiocoma	echinata	UF11738	UF 11738	1	0	45013	1431	882	WA	0.5	18.06	296.98	687
505	Ophiocoma~endeani~OEWG2a_AU_3s	Ophiocomidae	Ophiocoma	endeani	OEWG2a	MV F210911	0	0	45351	1419	553	AU	1.5	-30.1	153.2	678
506	Ophiocoma~erinaceus~TANIA607_EP_3	Ophiocomidae	Ophiocoma	erinaceus	TANIA607	UNAM-ICML 3.15.5	0	0	45366	1431	0	EP	19	10.3	250.76	689
507	Ophiocoma~erinaceus~F109808_IP_3	Ophiocomidae	Ophiocoma	erinaceus	F109808	MV F109808	0	0	44988	1419	0	IP	3	-14.66	145.44	690
508	Ophiocoma~krohi~emilie2_IN_3	Ophiocomidae	Ophiocoma	krohi	emilie2		0	0	44751	1431	0	IN	1	-19.6648	63.4509	648
509	Ophiocoma~longispina~J25567_IP_3s	Ophiocomidae	Ophiocoma	longispina	J25567	AM J25567	0	0	44802	1431	540	IP	29	-23.17	222.84	656
511	Ophiocoma~occidentalis~F92937_AU_3	Ophiocomidae	Ophiocoma	occidentalis	F92937	MV F92937	0	0	44263	1431	0	AU	1.25	-32.03	115.52	663
512	Ophiocoma~paucigranulata~TIM004_WA_3	Ophiocomidae	Ophiocoma	paucigranulata	TIM004	UNAM-ICML 3.147.3	0	0	44702	1431	0	WA	10	18.69	272.28	653
514	Ophiocoma~pica~UF9547_IP_3	Ophiocomidae	Ophiocoma	pica	UF9547	UF 9547	1	0	45249	1431	0	IP	14	-22.75	113.64	655
515	Ophiocoma~pumila~UF11883_WA_3	Ophiocomidae	Ophiocoma	pumila	UF11883	UF 11883	1	0	44793	1431	0	WA	6	18.07	296.98	680
517	Ophiocoma~pusilla~F109823_IP_3	Ophiocomidae	Ophiocoma	pusilla	F109823	MV F109823	0	0	44775	1431	0	IP	3.5	-14.68	145.47	658
518	Ophiocoma~schoenleinii~F109814_IP_3	Ophiocomidae	Ophiocoma	schoenleinii	F109814	MV F109814	0	0	44797	1431	0	IP	3.5	-14.68	145.47	693
520	Ophiocoma~scolopendrina~F109807_IP_3s	Ophiocomidae	Ophiocoma	scolopendrina	F109807	MV F109807	0	0	44466	1431	988	IP	0	-14.69	145.46	695
521	Ophiocoma~valenciae~emilie1_IN_3	Ophiocomidae	Ophiocoma	valenciae	emilie1		0	0	44637	1428	0	IN	1	-13.4255	48.3063	681
522	Ophiocoma~wendtii~MVF193471_WA_3s	Ophiocomidae	Ophiocoma	wendtii	MVF193471	MV F193471	1	0	34856	1431	991	WA	3	26.783	279.956	659
523	Ophiocomella~ophiactoides~TIM015_WA_3	Ophiocomidae	Ophiocomella	ophiactoides	TIM015	UNAM-ICML 3.187.13	0	0	44932	1428	0	WA	1	21.46	262.77	682
525	Ophiocomella~sexradia~TOH252-IE.2007.4709_IN_3s	Ophiocomidae	Ophiocomella	sexradia	TOH252-IE.2007.4709	MNHN IE.2007.4709	0	0	44996	1428	990	IN	0.5	-25.03	46.99	683
526	Ophiocomella~sexradia~F193493_IP_3s	Ophiocomidae	Ophiocomella	sexradia	F193493	MV F193493	0	0	44883	1431	990	IP	3	-13.81	127.26	685
527	Ophiocomina~australis~OAMC1a_AU_3	Clarkcomidae	Ophiocomina	australis	OAMC1a	MV F101798	0	0	45963	1419	0	AU	6	-38.77	146.4	589
528	Ophiocomina~nigra~F120923_NEA_3	Ophiotretidae	Ophiocomina	nigra	F120923	MV F120923	0	0	45900	1428	0	NEA	45	58.23	11.48	608
529	Ophiocomina~sp~OTC1a_SA_3	Clarkcomidae	Ophiocomina	sp	OTC1a	MV F167538	1	0	45922	1419	0	SA	216.5	-37.33	347.5	585
530	Ophioconis~cupida~F173903_IP_3	Ophiomyxidae	Ophioconis	cupida	F173903	MV F173903	0	0	43694	1419	0	IP	74.95	-10.42	129.66	755
531	Ophioconis~opacum~F111582_AU_1	Ophiomyxidae	Ophioconis	opacum	F111582	MV F111582	1	0	44285	0	0	AU	152	-35.19	118.64	754
532	Ophiocopa~spatula~F112653_IP_3	Ophiotretidae	Ophiocopa	spatula	F112653	MV F112653	1	0	45721	1428	0	IP	200	-17.43	120.43	620
533	Ophiocreas~ambonescium~F162652_IP_3	Euryalidae	Ophiocreas	ambonescium	F162652	MV F162652	0	0	45799	1419	0	IP	400	-13.22	123.39	905
537	Ophiocreas~oedipus~F159678_IP_3s	Euryalidae	Ophiocreas	oedipus	F159678	MV F159678	0	0	45046	1431	993	IP	1365	-28.23	162.62	890
540	Ophiocreas~oedipus~XXXa_NZ_3s	Euryalidae	Ophiocreas	oedipus	XXXa	NIWA	0	0	37623	1431	993	NZ	1418	-36.316	178.051	891
541	Ophiocreas~sibogae~F159746_AU_3	Euryalidae	Ophiocreas	sibogae	F159746	MV F159746	0	0	45712	1419	0	AU	480	-35.05	133.95	908
542	Ophiocreas~sibogae~A83811_SA_3	Euryalidae	Ophiocreas	sibogae	A83811	SAMC MB-A73811	0	0	45905	1428	0	SA	958	-36.14	22.37	907
543	Ophiocreas~sp~NA064.005.01.01.A_EP_3	Euryalidae	Ophiocreas	sp	NA064.005.01.01.A		0	0	45819	1428	0	EP	1154	1.21375	268.91	910
544	Ophiocreas~sp1~F146228_AU_3	Euryalidae	Ophiocreas	sp1	F146228	MV F146228	0	0	40739	1428	0	AU	625	-43.92	150.46	911
545	Ophiocreas~sp2~NA064.026.01.01.A_EP_3	Euryalidae	Ophiocreas	sp2	NA064.026.01.01.A		1	0	45832	1431	0	EP	1286	1.67195	268.315	900
548	Ophiocrossota~multispina~F173961_AU_3	Ophiuridae	Ophiocrossota	multispina	F173961	MV F173961	1	0	36223	1428	0	AU	0.5	-38.43	145.05	1214
549	Ophiocryptus~dubius~UF13916_WA_3	Ophiodermatidae	Ophiocryptus	dubius	UF13916	UF 13916	0	0	45982	1419	0	WA	8	16.37	298.47	722
550	Ophiocten~affinis~ZMMU_AR_3	Ophiuridae	Ophiocten	affinis	ZMMU	ZMMU	0	0	37040	1431	0	AR	10	69.128	36.03	1218
552	Ophiocten~amitinum~TM02_SK_3	Ophiuridae	Ophiocten	amitinum	TM02	SAMC	0	0	40754	1431	0	SK	260.5	-46.89	37.58	1224
554	Ophiocten~australis~F222715_AU_3s	Ophiuridae	Ophiocten	australis	F222715	MV F222715	0	0	36306	1431	987	AU	2010	-44.32	147.36	1230
555	Ophiocten~gracilis~F214042_NEA_3	Ophiuridae	Ophiocten	gracilis	F214042	MV F214042	0	0	16608	1176	0	NEA	679	56.5	342.7	1221
556	Ophiocten~hastatum~CAS161450_AN_3s	Ophiuridae	Ophiocten	hastatum	CAS161450	CAS 161450	0	0	38002	1431	987	AN	2085.5	-65.29	306.61	1226
558	Ophiocten~hastatum~PS143.2c_SM_3s	Ophiuridae	Ophiocten	hastatum	PS143.2c	CAS	0	0	38512	1431	987	SM	774	-58.739	334.825	1222
559	Ophiocten~ludwigi~PS140.7_SM_3s	Ophiuridae	Ophiocten	ludwigi	PS140.7	CAS	1	0	38619	1425	987	SM	2951.5	-58.267	335.104	1227
560	Ophiocten~megaloplax~2009.6744_AN_3	Ophiuridae	Ophiocten	megaloplax	2009.67	MNHN IE.2009.6744	0	0	20448	1392	0	AN	na	-66	142	1225
563	Ophiocten~sp~NA064.069.02.A_EP_3	Ophiuridae	Ophiocten	sp	NA064.069.02.A		0	0	38312	1431	0	EP	1193	1.879	267.87	1217
565	Ophiocten~spMoV5674~43121_NZ_3	Ophiuridae	Ophiocten	spMoV5674	43121	NIWA 43121	0	0	35934	1281	0	NZ	1086	-48.53	164.94	1216
566	Ophioctenella~acies~IE.2013.6158_EA_3	Ophiuridae	Ophioctenella	acies	IE.2013.6158	MNHN IE.2013.6158	0	0	42318	1431	0	EA	3481	23.37	315.05	1209
569	Ophiocypris~tuberculosus~MVF193426_NZ_3s	Ophiodermatidae	Ophiocypris	tuberculosus	MVF193426	MV F193426	0	0	32646	1431	984	NZ	1157.5	-36.79	177.454	696
570	Ophiodaphne~formata~F111999_IP_3	Amphiuridae	Ophiodaphne	formata	F111999	MV F111999	1	0	45684	1431	0	IP	165.5	-21.98	113.82	101
571	Ophiodaphne~scripta~IE.2007.5337_IP_3s	Amphiuridae	Ophiodaphne	scripta	IE.2007.5337	MNHN IE.2007.5337	0	0	45551	1215	621	IP	415	-24.73	159.72	103
572	Ophioderma~appressa~F121074_WA_3s	Ophiodermatidae	Ophioderma	appressa	F121074	MV F121074	1	0	45976	1419	985	WA	1	9.66	280.13	717
573	Ophioderma~brevicaudum~UF11727_WA_3	Ophiodermatidae	Ophioderma	brevicaudum	UF11727	UF 11727	0	0	45715	1431	0	WA	0.5	18.06	296.98	725
574	Ophioderma~brevispinum~UF11740_WA_3s	Ophiodermatidae	Ophioderma	brevispinum	UF11740	UF 11740	0	0	45847	1431	985	WA	0.5	18.06	296.98	714
575	Ophioderma~cinerea~UF12806_WA_3	Ophiodermatidae	Ophioderma	cinerea	UF12806	UF 12806	1	0	45980	1431	0	WA	19	16.45	298.46	723
576	Ophioderma~ensifera~TIMX02_WA_3	Ophiodermatidae	Ophioderma	ensifera	TIMX02	UNAM-ICML 3.204.1	0	0	45962	1419	0	WA	11	20.46	273.02	709
577	Ophioderma~guttatum~UF11858_WA_3	Ophiodermatidae	Ophioderma	guttatum	UF11858	UF 11858	0	0	45983	1419	0	WA	15	18.12	297.02	713
578	Ophioderma~longicauda~F92223_NEA_3	Ophiodermatidae	Ophioderma	longicauda	F92223	MV F92223	0	0	45921	1431	0	NEA	12	38.18	15.55	726
579	Ophioderma~panamense~TANIA608_EP_3	Ophiodermatidae	Ophioderma	panamense	TANIA608	UNAM-ICML	0	0	45897	1431	0	EP	5	18.35	256.48	724
580	Ophioderma~peruana~TANIA377_EP_3	Ophiodermatidae	Ophioderma	peruana	TANIA377	CZA E154	0	0	45950	1419	0	EP	na	-5.22	278.8	720
581	Ophioderma~phoenium~UF11860_WA_3s	Ophiodermatidae	Ophioderma	phoenium	UF11860	UF 11860	0	0	45989	1431	755	WA	15	18.12	297.02	721
582	Ophioderma~rubicundum~UF11756_WA_3	Ophiodermatidae	Ophioderma	rubicundum	UF11756	UF 11756	0	0	45986	1431	0	WA	11.5	18.12	297.02	718
583	Ophioderma~squamosissimum~UF11765_WA_3	Ophiodermatidae	Ophioderma	squamosissimum	UF11765	UF 11765	0	0	45969	1431	0	WA	12.5	18.13	296.99	712
584	Ophioderma~teres~TANIA390_EP_3	Ophiodermatidae	Ophioderma	teres	TANIA390	UNAM-ICML 3.19.65	0	0	45944	1419	0	EP	3	27.9	249.03	719
585	Ophioderma~vansyoci~TANIA626_EP_3	Ophiodermatidae	Ophioderma	vansyoci	TANIA626	UNAM-ICML 3.202.0	0	0	45908	1431	0	EP	27.8	25.11	249.48	711
586	Ophioderma~variegata~TANIA342_EP_3	Ophiodermatidae	Ophioderma	variegata	TANIA342	CZA E130	0	0	45863	1431	0	EP	na	-3.98	279.03	716
587	Ophioderma~wahlbergii~A88444_SA_3	Ophiodermatidae	Ophioderma	wahlbergii	A88444	SAMC MB-A88444	0	0	32153	1431	0	SA	17.5	-34.2	18.45	710
588	Ophiodictys~pectorale~IE.2007.6979_IP_3	Ophiopsilidae	Ophiodictys	pectorale	IE.2007.6979	MNHN IE.2007.6979	1	0	44232	1428	0	IP	800	-22.4	171.78	270
589	Ophiodoris~malignus~F159755_AU_3s	Ophionereididae	Ophiodoris	malignus	F159755	MV F159755	0	0	44418	1419	989	AU	350	-35.22	134.51	368
590	Ophiodoris~malignus~IE.2007.7181_IP_3s	Ophionereididae	Ophiodoris	malignus	IE.2007.7181	MNHN IE.2007.7181	0	0	45001	1419	989	IP	474.5	-22.35	171.64	369
591	Ophiodoris~pericalles~1238_IP_3s	Ophionereididae	Ophiodoris	pericalles	1238	MNHN IE.2012.1238	1	0	45988	1428	660	IP	463	22.8	121.46	364
592	Ophiogona~doederleini~CAS161397_AN_3s	Ophiopyrgidae	Ophiogona	doederleini	CAS161397	CAS 161397	0	0	23357	1431	986	AN	2854.5	-61.72	299.28	1115
593	Ophiogona~doederleini~PS143.2a_SM_3s	Ophiopyrgidae	Ophiogona	doederleini	PS143.2a	CAS	1	0	45947	1428	986	SM	774	-58.739	334.825	1114
594	Ophiogymna~elegans~UF2496_IP_3	Ophiotrichidae	Ophiogymna	elegans	UF2496	UF 2496	0	0	43673	1431	0	IP	9	-2.69	150.68	199
595	Ophiogymna~fulgens~IE.2007.6848_IP_3s	Ophiotrichidae	Ophiogymna	fulgens	IE.2007.6848	MNHN IE.2007.6848	0	0	42788	1431	990	IP	405	-18.59	164.39	196
596	Ophiogymna~funesta~F165970_IP_3	Ophiotrichidae	Ophiogymna	funesta	F165970	MV F165970	0	0	44342	1410	0	IP	100	-15.08	121.75	198
597	Ophiogymna~pellicula~F165966_IP_3s	Ophiotrichidae	Ophiogymna	pellicula	F165966	MV F165966	0	0	43460	1422	990	IP	182	-17.48	120.46	195
598	Ophiogymna~pulchella~F146306_IP_3	Ophiotrichidae	Ophiogymna	pulchella	F146306	MV F146306	0	0	44508	1410	0	IP	96	-20.2	115.13	197
599	Ophiohamus~nanus~IE.2007.5442_IP_3	Ophiacanthidae	Ophiohamus	nanus	IE.2007.5442	MNHN IE.2007.5442	0	0	44773	1167	0	IP	365	-22.3	159.47	462
600	Ophiolebella~biscutifera~F167505_SM_3	Ophiacanthidae	Ophiolebella	biscutifera	F167505	MV F167505	0	0	45172	1431	0	SM	100.5	-54.42	324.09	549
601	Ophiolebes~comatulina~NIWA30954_NZ_3s	Ophiacanthidae	Ophiolebes	comatulina	NIWA30954	NIWA 30954	0	0	45321	1425	986	NZ	522.5	-42.99	182.39	556
602	Ophiolebes~mortenseni~NA064.027.01.05.A_EP_3	Ophiacanthidae	Ophiolebes	mortenseni	NA064.027.01.05.A		0	0	45680	1413	0	EP	1273	1.6721	268.315	513
603	Ophiolebes~sp~82101_NZ_3s	Ophiacanthidae	Ophiolebes	sp	82101	NIWA 82101	0	0	43681	1431	985	NZ	1497.5	-36.92	176.97	563
604	Ophiolebes~spMoV3581~F112106_AU_3s	Ophiacanthidae	Ophiolebes	spMoV3581	F112106	MV F112106	0	0	45571	1055	986	AU	907.5	-35.43	118.35	516
606	Ophioleila~elegans~SIOC.1_IP_3	Ophiothamnidae	Ophioleila	elegans	SIOC.1	SIOC	1	0	41304	1419	0	IP	1660	15.683	154.93	129
607	Ophiolepis~biscalata~MVF193431_NZ_3s	Ophiolepididae	Ophiolepis	biscalata	MVF193431	MV F193431	0	0	32764	1431	986	NZ	935	-36.454	177.838	282
608	Ophiolepis~buitronae~UF13766_WA_3s	Ophiolepididae	Ophiolepis	buitronae	UF13766	UF 13766	0	0	45894	1428	647	WA	8	16.37	298.47	296
609	Ophiolepis~cardioplax~SBD002904_IP_3	Ophiolepididae	Ophiolepis	cardioplax	SBD002904	MTQ SBD002904	0	0	43806	1428	0	IP	64.45	-17.9	146.81	311
610	Ophiolepis~cf.biscalata~TANIA670_IP_3	Ophiolepididae	Ophiolepis	cf.biscalata	TANIA670	UF 15076	0	0	45743	1431	0	IP	na	-5.14	145.85	285
611	Ophiolepis~cincta~F109844_IP_3	Ophiolepididae	Ophiolepis	cincta	F109844	MV F109844	0	0	45788	1431	0	IP	3.5	-14.68	145.47	309
612	Ophiolepis~elegans~F121055_WA_3	Ophiolepididae	Ophiolepis	elegans	F121055	MV F121055	1	0	45810	1431	0	WA	1	9.24	277.82	301
613	Ophiolepis~gemma~TANIA611_WA_3	Ophiolepididae	Ophiolepis	gemma	TANIA611	UNAM-ICML	0	0	45852	1428	0	WA	na	20.389	87.311	294
614	Ophiolepis~grisea~TANIA2001-43.1_EP_3	Ophiolepididae	Ophiolepis	grisea	TANIA2001-43.1	LACM 2001-43.1	0	0	45669	1431	0	EP	26	13.28	272.22	299
616	Ophiolepis~irregularis~UF10345_IP_3	Ophiolepididae	Ophiolepis	irregularis	UF10345	UF 10345	0	0	45955	1431	0	IP	15	13.45	144.65	310
617	Ophiolepis~nodosa~UF13696_IP_3	Ophiolepididae	Ophiolepis	nodosa	UF13696	UF 13696	0	0	45949	1431	0	IP	na	na	na	305
618	Ophiolepis~pacifica~TANIA622_EP_3	Ophiolepididae	Ophiolepis	pacifica	TANIA622	UNAM-ICML	0	0	45650	1428	0	EP	na	21	254	295
619	Ophiolepis~paucispina~F193487_WA_3	Ophiolepididae	Ophiolepis	paucispina	F193487	MV F193487	0	0	45296	1431	0	WA	3	26.78	279.95	297
620	Ophiolepis~plateia~UNAM_EP_3	Ophiolepididae	Ophiolepis	plateia	UNAM	UNAM-ICML	0	0	45910	1431	0	EP	na	na	na	298
621	Ophiolepis~rugosa~F162622_IP_3	Ophiolepididae	Ophiolepis	rugosa	F162622	MV F162622	1	0	45908	1431	0	IP	92.5	-21.03	114.88	292
623	Ophiolepis~superba~TANIA686_IP_3	Ophiolepididae	Ophiolepis	superba	TANIA686	UF 17684	0	0	45753	1431	0	IP	na	na	na	303
624	Ophiolepis~unicolor~F168048_IP_3	Ophiolepididae	Ophiolepis	unicolor	F168048	MV F168048	0	0	45799	1431	0	IP	30	-24.01	113.43	304
625	Ophiolepis~variegata~UNAM3.26.26_EP_3	Ophiolepididae	Ophiolepis	variegata	UNAM3.26.26	UNAM-ICML 3.26.26	0	0	45654	1431	0	EP	28.4	16.05	265.71	300
626	Ophioleptoplax~sp1~IE.2007.7000_IP_3s	Ophioscolecidae	Ophioleptoplax	sp1	IE.2007.7000	MNHN IE.2007.7000	1	0	42120	1419	986	IP	350	-22.36	171.65	849
627	Ophioleptoplax~sp2~IE.2007.6821_IP_3	na2	Ophioleptoplax	sp2	IE.2007.6821	MNHN IE.2007.6821	1	0	44749	1431	466	IP	460	-22.04	168.68	644
629	Ophioleuce~brevispinum~MVF188879_NZ_3s	Ophioleucidae	Ophioleuce	brevispinum	MVF188879	MV F188879	0	0	35385	1431	988	NZ	961	-36.801	177.454	447
631	Ophioleuce~regulare~F227352_AU_3	Ophioleucidae	Ophioleuce	regulare	F227352	MV F227352	0	0	42840	1428	0	AU	2028	-44.32	147.31	444
633	Ophioleuce~seminudum~F162612_IP_3	Ophioleucidae	Ophioleuce	seminudum	F162612	MV F162612	1	0	44052	1428	460	IP	113	-15.79	121.05	440
634	Ophioleuce~spMoV5234~DW3876_IP_3s	Ophioleucidae	Ophioleuce	spMoV5234	DW3876	MNHN	0	0	44232	1428	643	IP	675.5	-22.28	171.29	441
636	Ophiolimna~antarctica~BP26_IP_3s	Ophiacanthidae	Ophiolimna	antarctica	BP26	MNHN	0	0	45017	1431	984	IP	713	-4.067	151.833	576
638	Ophiolimna~antarctica~TM04_SK_3	Ophiacanthidae	Ophiolimna	antarctica	TM04	SAMC	0	0	45087	1428	0	SK	142	-46.94	37.9	581
639	Ophiolimna~antarctica~PS140.7c_SM_3s	Ophiacanthidae	Ophiolimna	antarctica	PS140.7c	CAS	0	0	39933	1422	756	SM	2951.5	-58.267	335.104	582
640	Ophiolimna~bairdi~NA064-015-13-A_EP_3	Ophiomyxidae	Ophiolimna	bairdi	NA064-015-13-A		0	0	45718	1431	0	EP	376	1.22	268.88	783
641	Ophiolimna~cf.bairdi~F227354_AU_3	Ophiacanthidae	Ophiolimna	cf.bairdi	F227354	MV F227354	1	0	41835	1428	0	AU	2028	-44.32	147.31	580
642	Ophiolimna~perfida~TOH274-IE.2007.4348_IN_3s	Ophiacanthidae	Ophiolimna	perfida	TOH274-IE.2007.4348	MNHN IE.2007.4348	0	0	45134	1431	984	IN	865.5	-25.58	44.25	578
644	Ophiolimna~perfida~MVF188866_NZ_3s	Ophiacanthidae	Ophiolimna	perfida	MVF188866	MV F188866	1	0	38908	1431	984	NZ	888.5	-36.445	177.839	579
645	Ophiolipus~agassizii~UNAM3.200.11.1_WA_3	Ophiosphalmidae	Ophiolipus	agassizii	UNAM3.200.11.1	UNAM-ICML 3.200.11.1	0	0	44524	1419	0	WA	376.5	21.202	263.103	973
646	Ophiolipus~granulatus~BP74_IP_3	Ophiosphalmidae	Ophiolipus	granulatus	BP74	MNHN	1	0	44386	1431	0	IP	398.5	-5.62	154.02	990
647	Ophiolipus~levis~TOH262-IE.2014.2021_IP_3	Ophiosphalmidae	Ophiolipus	levis	TOH262-IE.2014.2021	MNHN IE.2014.2021	0	0	44097	1431	0	IP	432	20.7	116.13	993
649	Ophiologimus~prolifer~72779_NZ_3s	Ophioscolecidae	Ophiologimus	prolifer	72779	NIWA 72779	1	0	45694	1431	565	NZ	662.5	-35.71	178.48	832
650	Ophiologimus~prolifer~BMNHb_SK_3s	Ophioscolecidae	Ophiologimus	prolifer	BMNHb	BMNH	0	0	37902	1431	985	SK	750	-41.372	42.901	837
651	Ophiologimus~quadrispinus~IE.2007.7264_IP_3s	Ophioscolecidae	Ophiologimus	quadrispinus	IE.2007.7264	MNHN IE.2007.7264	0	0	44954	1431	891	IP	835	-19.86	165.92	840
652	Ophiolycus~dentatus~A73862_SA_3	Ophioscolecidae	Ophiolycus	dentatus	A73862	SAMC MB-A73862	0	0	45374	1422	0	SA	404	-33.21	17.29	833
655	Ophiolycus~sp~F111573_AU_3s	Ophioscolecidae	Ophiolycus	sp	F111573	MV F111573	1	0	45164	1269	985	AU	907.5	-35.43	118.35	834
656	Ophiolycus~sp~NIWA43111_NZ_3s	Ophioscolecidae	Ophiolycus	sp	NIWA43111	NIWA 43111	0	0	45452	1428	958	NZ	713	-56.24	158.5	835
657	Ophiomages~cristatus~F214051_AN_3s	Ophiopyrgidae	Ophiomages	cristatus	F214051	MV F214051	0	0	45944	1431	986	AN	93	-60.96	304.32	1183
658	Ophiomastix~annulosa~F93625_IP_3	Ophiocomidae	Ophiomastix	annulosa	F93625	MV F93625	0	0	45262	1431	0	IP	8.5	-12.22	122.98	670
659	Ophiomastix~asperula~F91573_IP_3	Ophiocomidae	Ophiomastix	asperula	F91573	MV F91573	0	0	39782	1419	0	IP	3.5	-12.25	143.23	669
660	Ophiomastix~caryophyllata~F109821_IP_3s	Ophiocomidae	Ophiomastix	caryophyllata	F109821	MV F109821	0	0	45012	1431	991	IP	8.5	-14.65	145.45	672
661	Ophiomastix~elegans~F168757_IP_3	Ophiocomidae	Ophiomastix	elegans	F168757	MV F168757	1	0	45086	1419	0	IP	53.5	-22.76	113.63	661
662	Ophiomastix~flaccida~UF15654a_IP_1	Ophiocomidae	Ophiomastix	flaccida	UF15654a	UF 15654	0	0	43554	0	0	IP	na	-5.1	145.8	666
663	Ophiomastix~janualis~F109818.2_IP_3	Ophiocomidae	Ophiomastix	janualis	F109818.2	MV F109818	0	0	22450	1419	0	IP	4.5	-14.662	145.447	671
664	Ophiomastix~koehleri~emilie4_IN_3	Ophiocomidae	Ophiomastix	koehleri	emilie4	UF 7263	0	0	44997	1431	0	IN	8	-13.4789	48.2366	674
665	Ophiomastix~mixta~emilie5_IP_3s	Ophiocomidae	Ophiomastix	mixta	emilie5	UF 1298	0	0	45255	1431	991	IP	6	-14.2715	189.427	677
666	Ophiomastix~palaoensis~SBD018440_IP_3	Ophiocomidae	Ophiomastix	palaoensis	SBD018440	MTQ SBD018440	0	0	45046	1431	0	IP	15.3	-13.06	143.8	667
667	Ophiomastix~stenozonula~UF7992_IP_3	Ophiocomidae	Ophiomastix	stenozonula	UF7992	UF 7992	1	0	45168	1431	484	IP	19	-17.56	210.11	676
668	Ophiomastix~variabilis~F109820_IP_3s	Ophiocomidae	Ophiomastix	variabilis	F109820	MV F109820	0	0	45272	1431	991	IP	8.5	-14.65	145.45	668
669	Ophiomastix~venosa~IE.2007.4642_IN_3s	Ophiocomidae	Ophiomastix	venosa	IE.2007.4642	MNHN IE.2007.4642	0	0	45165	1431	901	IN	11.5	-25.03	47	673
670	Ophiomastus~cf.tegulitius~F227981_AU_3	Ophioplocidae	Ophiomastus	cf.tegulitius	F227981	MV F227981	0	0	43892	1431	0	AU	400	-35.29	134.51	315
671	Ophiomastus~spB~BP75_IP_3	Ophioplocidae	Ophiomastus	spB	BP75	MNHN IE.2007.2825	0	0	42617	1419	456	IP	442	-3.07	147.53	314
674	Ophiomaza~cacaotica~F193462_IP_3s	Ophiotrichidae	Ophiomaza	cacaotica	F193462	MV F193462	0	0	44085	1422	990	IP	100.8	-10.96	136.79	210
675	Ophiomelina~spMoV4534~F227371_AU_3s	Ophiacanthidae	Ophiomelina	spMoV4534	F227371	MV F227371	0	0	45383	1392	988	AU	2028	-44.32	147.31	524
676	Ophiomisidium~irene~F144851_AU_3	Astrophiuridae	Ophiomisidium	irene	F144851	MV F144851	0	0	45092	1419	0	AU	1255	-44.25	147.21	1021
677	Ophiomisidium~pulchellum~DSC-INV162_SA_3	Astrophiuridae	Ophiomisidium	pulchellum	DSC-INV162	MV	0	0	44443	1404	0	SA	232	na	na	1020
678	Ophiomitra~leucorhabdota~BP27_IP_3	Ophiotretidae	Ophiomitra	leucorhabdota	BP27	MNHN IE.2007.2857	1	0	45947	1419	0	IP	410	-6.05	147.6	597
679	Ophiomitra~valida~UF8989_WA_3	Ophiotretidae	Ophiomitra	valida	UF8989	UF 8989	1	0	45739	1431	0	WA	274	24.24	278.56	622
680	Ophiomitrella~barbara~F159616_IP_3	Ophiacanthidae	Ophiomitrella	barbara	F159616	MV F159616	0	0	45424	1410	0	IP	700	-14.61	121.32	491
681	Ophiomitrella~cf.ingrata~F167540_SA_3	Ophiacanthidae	Ophiomitrella	cf.ingrata	F167540	MV F167540	0	0	45119	1431	0	SA	216.5	-37.33	347.5	564
682	Ophiomitrella~conferta~F168828_AN_1s	Ophiacanthidae	Ophiomitrella	conferta	F168828	MV F168828	0	0	44248	0	985	AN	262.5	-60.75	316.32	569
683	Ophiomitrella~conferta~F144750_AU_3s	Ophiacanthidae	Ophiomitrella	conferta	F144750	MV F144750	1	0	45623	1431	985	AU	840	-44.06	146.23	568
684	Ophiomitrella~conferta~CP3893_IP_3s	Ophiacanthidae	Ophiomitrella	conferta	CP3893	MNHN	0	0	42295	1431	985	IP	800	-22.4	171.78	567
686	Ophiomitrella~corynephora~DSC-INV534_SA_3	Ophiacanthidae	Ophiomitrella	corynephora	DSC-INV534	MV	0	0	45697	1410	0	SA	418	na	na	566
687	Ophiomitrella~granulosa~F99781_NZ_3	Ophiacanthidae	Ophiomitrella	granulosa	F99781	MV F99781	0	0	45412	1428	0	NZ	272.5	-33.77	167.32	460
688	Ophiomitrella~mensa~NIWA86243_NZ_3s	Ophiacanthidae	Ophiomitrella	mensa	NIWA86243	NIWA 86243	0	0	44967	1428	985	NZ	506.5	-30.08	179.82	461
689	Ophiomitrella~mutata~F159615_IP_3	Ophiacanthidae	Ophiomitrella	mutata	F159615	MV F159615	1	0	45017	1431	0	IP	390	-13.26	123.37	489
690	Ophiomitrella~nudextrema~IE.2007.4178_IN_3	Ophiacanthidae	Ophiomitrella	nudextrema	IE.2007.4178	MNHN IE.2007.4178	0	0	44909	1428	0	IN	275	-26.23	45.15	464
691	Ophiomitrella~sp1~DW1826.1_IP_3	Ophiacanthidae	Ophiomitrella	sp1	DW1826.1	MNHN	0	0	45101	1428	0	IP	425	-9.94	161.067	490
692	Ophiomitrella~spMoV2732~F168730_AU_3s	Ophiacanthidae	Ophiomitrella	spMoV2732	F168730	MV F168730	0	0	45546	1431	985	AU	1599	-44.38	147.25	573
693	Ophiomitrella~spMoV2779~F226849_AU_3	Ophiacanthidae	Ophiomitrella	spMoV2779	F226849	MV F226849	0	0	45203	1419	0	AU	2028	-44.32	147.31	575
694	Ophiomitrella~stellifera~TOH267-IE.2014.2043_IP_3	Ophiacanthidae	Ophiomitrella	stellifera	TOH267-IE.2014.2043	MNHN IE.2014.2043	0	0	45221	1410	0	IP	397	20.78	116.13	492
695	Ophiomitrella~tenuis~IE.2013.6313_IP_3	Ophiacanthidae	Ophiomitrella	tenuis	IE.2013.6313	MNHN IE.2013.6313	0	0	44590	1413	0	IP	406.5	-19.55	158.67	465
696	Ophiomoeris~exuta~CP3848_IP_3	Ophiacanthidae	Ophiomoeris	exuta	CP3848	MNHN	0	0	44363	1422	0	IP	435	-22.05	168.69	506
697	Ophiomoeris~obstricta~BP37_IP_3s	Ophiacanthidae	Ophiomoeris	obstricta	BP37	MNHN IE.2007.2936	1	0	44826	1258	987	IP	587	-8.25	150.75	508
698	Ophiomoeris~obstricta~MVF188867_NZ_3s	Ophiacanthidae	Ophiomoeris	obstricta	MVF188867	MV F188867	0	0	37551	1431	987	NZ	888.5	-36.445	177.839	507
699	Ophiomonas~guerini~7.4271_IN_3s	Amphilepididae	Ophiomonas	guerini	7.4271	MNHN IE.2007.4271	0	0	42976	1431	525	IN	266	-25.11	44.01	119
700	Ophiomusium~acuferum~UF13044_WA_3	Ophiomusaidae	Ophiomusium	acuferum	UF13044	UF 13044	1	0	45429	1431	0	WA	156	27.73	275.39	996
701	Ophiomusium~anisacanthum~F159751_AU_3	Ophiomusaidae	Ophiomusium	anisacanthum	F159751	MV F159751	0	0	45676	1419	0	AU	350	-35.22	134.51	1009
702	Ophiomusium~asperum~BP80_IP_3	Ophiomusaidae	Ophiomusium	asperum	BP80	MNHN IE.2007.2932	0	0	45237	1419	0	IP	616.5	-6.02	147.58	1003
703	Ophiomusium~australe~F159743_AU_3	Ophiomusaidae	Ophiomusium	australe	F159743	MV F159743	1	0	45233	1419	0	AU	250	-35.29	134.6	1000
704	Ophiomusium~cf.constrictum~CAS161525_SM_3	Ophiomusaidae	Ophiomusium	cf.constrictum	CAS161525	CAS 161525	0	0	44260	1428	0	SM	2207	-59.39	299.94	1017
705	Ophiomusium~eburneum~UF5845_WA_3	Ophiosphalmidae	Ophiomusium	eburneum	UF5845	UF 5845	1	0	44603	1431	0	WA	421.5	24.34	276.82	972
706	Ophiomusium~facetum~IE.2007.3564_IN_3s	Ophiomusaidae	Ophiomusium	facetum	IE.2007.3564	MNHN IE.2007.3564	0	0	45414	1428	989	IN	508	-12.64	48.2	1007
707	Ophiomusium~facundum~BP76_IP_3	Ophiomusaidae	Ophiomusium	facundum	BP76	MNHN IE.2007.2819	0	0	45593	1431	0	IP	690	-2.22	150.38	1006
708	Ophiomusium~fallax~1243_IP_3	Ophiomusaidae	Ophiomusium	fallax	1243	MNHN IE.2012.1243	1	0	45087	1428	0	IP	463	22.8	121.46	1016
709	Ophiomusium~granosum~F237941_IP_3	Ophiomusaidae	Ophiomusium	granosum	F237941	MV F237941	0	0	44616	1410	0	IP	2346	-25.32	154.06	995
710	Ophiomusium~incertum~F144844_AU_3	Ophiomusaidae	Ophiomusium	incertum	F144844	MV F144844	0	0	44590	1428	0	AU	390	-43.99	147.54	1019
711	Ophiomusium~luetkeni~TOH280-IE.2007.4358_IN_3	Ophiomusaidae	Ophiomusium	luetkeni	TOH280-IE.2007.4358	MNHN IE.2007.4358	0	0	43857	1428	0	IN	206.5	-25.46	44.41	997
712	Ophiomusium~luetkeni~BP77_IP_3	Ophiomusaidae	Ophiomusium	luetkeni	BP77	MNHN	0	0	45246	1431	0	IP	300	-2.17	147.28	998
713	Ophiomusium~lunare~BP78_IP_3	Ophiomusaidae	Ophiomusium	lunare	BP78	MNHN IE.2007.2852	1	0	45550	1431	0	IP	349	-8.27	150.48	1010
714	Ophiomusium~lymani~F227603_AU_3s	Ophiomusaidae	Ophiomusium	lymani	F227603	MV F227603	0	0	44833	1428	989	AU	1021.5	-34.62	132.35	1012
715	Ophiomusium~lymani~F112023_IP_3s	Ophiomusaidae	Ophiomusium	lymani	F112023	MV F112023	0	0	45037	1428	989	IP	1018.5	-29.06	113.63	1014
717	Ophiomusium~lymani~MVF193430_NZ_3s	Ophiomusaidae	Ophiomusium	lymani	MVF193430	MV F193430	0	0	37329	1431	989	NZ	1285	-37.199	176.937	1013
718	Ophiomusium~mirandum~F162633_IP_3s	Ophiomusaidae	Ophiomusium	mirandum	F162633	MV F162633	0	0	45510	1419	988	IP	700	-14.61	121.32	1008
719	Ophiomusium~relictum~F157386_IP_3	Ophiomusaidae	Ophiomusium	relictum	F157386	MV F157386	1	0	45066	1425	0	IP	1532	-27.41	161.7	1005
720	Ophiomusium~scalare~F159752_AU_3	Ophiomusaidae	Ophiomusium	scalare	F159752	MV F159752	0	0	45087	1419	0	AU	350	-35.22	134.51	1004
722	Ophiomusium~simplex~BP79_IP_3	Ophiomusaidae	Ophiomusium	simplex	BP79	MNHN IE.2007.2826	0	0	45221	1419	0	IP	198	-2.17	147.25	1001
723	Ophiomusium~ultima~7.4277_IN_3	Ophiomusaidae	Ophiomusium	ultima	7.4277	MNHN IE.2007.4277	0	0	45027	1425	0	IN	161	-24.38	47.53	999
724	Ophiomyces~delata~BP34_IP_3	Ophiohelidae	Ophiomyces	delata	BP34	MNHN	1	0	35333	1431	0	IP	916	-7.38	147.58	819
725	Ophiomyces~frutectosus~UF16941_WA_3	Ophiohelidae	Ophiomyces	frutectosus	UF16941	UF 16941	0	0	34599	1419	0	WA	224.5	5.51	309.06	818
727	Ophiomyxa~australis~MVF214037_AU_3	Ophiomyxidae	Ophiomyxa	australis	MVF214037	MV F214037	0	0	41019	1431	0	AU	3.5	-38.3182	144.714	759
729	Ophiomyxa~australis~Aliwah8_SA_3	Ophiomyxidae	Ophiomyxa	australis	Aliwah8	MV F237925	0	0	45101	1419	0	SA	14.5	-30.26	30.81	772
730	Ophiomyxa~brevirima~F95868_NZ_3	Ophiomyxidae	Ophiomyxa	brevirima	F95868	MV F95868	0	0	45977	1431	0	NZ	14	-45.85	170.65	760
731	Ophiomyxa~compacta~SBD035975_IP_3s	Ophiomyxidae	Ophiomyxa	compacta	SBD035975	MTQ SBD035975	0	0	41091	1428	987	IP	62	-23.91	152.57	774
733	Ophiomyxa~crinita~OM1a_IP_3s	Ophiomyxidae	Ophiomyxa	crinita	OM1a	MNHN IE.2012.517	0	0	45676	1419	753	IP	85.5	-3.95	144.67	778
734	Ophiomyxa~flaccida~UF11848_WA_3	Ophiomyxidae	Ophiomyxa	flaccida	UF11848	UF 11848	0	0	38865	1431	0	WA	6	18.11	296.94	776
735	Ophiomyxa~neglecta~OM5_IP_3	Ophiomyxidae	Ophiomyxa	neglecta	OM5	MNHN IE.2012.677	0	0	45304	1092	0	IP	349	-8.27	150.48	779
736	Ophiomyxa~pentagona~F218660_NEA_3	Ophiomyxidae	Ophiomyxa	pentagona	F218660	MV F218660	0	0	44690	1428	0	NEA	4	35.05	32.35	775
738	Ophiomyxa~sp~IE.2007.7233_IP_3s	Ophiomyxidae	Ophiomyxa	sp	IE.2007.7233	MNHN IE.2007.7233	0	0	45228	1431	951	IP	641.5	-18.54	164.34	780
739	Ophiomyxa~sp~F99808_NZ_3s	Ophiomyxidae	Ophiomyxa	sp	F99808	MV F99808	0	0	45187	1431	951	NZ	792.5	-34.28	168.35	781
742	Ophiomyxa~spMoV5486~MVF188880_NZ_3s	Ophiomyxidae	Ophiomyxa	spMoV5486	MVF188880	MV F188880	0	0	27255	1431	986	NZ	918.5	-36.808	177.469	764
744	Ophiomyxa~vivipara~A82574_SA_3s	Ophiomyxidae	Ophiomyxa	vivipara	A82574	SAMC MB-A82574	0	0	45951	1431	986	SA	337	-30.93	16.63	765
745	Ophiomyxa~vivipara~F167537_SM_3s	Ophiomyxidae	Ophiomyxa	vivipara	F167537	MV F167537	0	0	45978	1428	635	SM	93	-52.11	301.92	769
746	Ophiomyxa~vivipara.capensis~OVC1_SK_3s	Ophiomyxidae	Ophiomyxa	vivipara.capensis	OVC1	BMNH	1	0	45985	1428	986	SK	740	-41.36	42.91	766
747	Ophionereis~albomaculata~TANIA326_EP_3	Ophionereididae	Ophionereis	albomaculata	TANIA326	CZA E116	0	0	45914	1431	0	EP	na	-3.9	279.13	405
748	Ophionereis~annulata~UF3352_EP_3	Ophionereididae	Ophionereis	annulata	UF3352	UF 3352	0	0	45988	1431	0	EP	18.5	8.24	281.12	406
749	Ophionereis~australis~12.1008_IN_3	Ophionereididae	Ophionereis	australis	12.1008	MNHN IE.2012.1008	0	0	45699	1431	0	IN	174.5	-26.21	45.11	373
750	Ophionereis~cf.fusca~UF10310_IP_3	Ophionereididae	Ophionereis	cf.fusca	UF10310	UF 10310	0	0	45981	1428	0	IP	2.5	13.46	144.68	416
751	Ophionereis~cf.olivacea~UF16984_WA_3	Ophionereididae	Ophionereis	cf.olivacea	UF16984	UF 16984	0	0	45981	1431	0	WA	66.5	6	307.73	403
752	Ophionereis~cf.schayeri~OSKD1a_IP_3s	Ophionereididae	Ophionereis	cf.schayeri	OSKD1a	AM J24835	1	0	45888	1428	988	IP	21	-29.27	182.07	382
753	Ophionereis~clarki~F111545_AU_3	Ophionereididae	Ophionereis	clarki	F111545	MV F111545	1	0	45941	1431	0	AU	152	-35.19	118.64	418
754	Ophionereis~degeneri~UF7904_IP_3	Ophionereididae	Ophionereis	degeneri	UF7904	UF 7904	0	0	45874	1428	0	IP	6	20.93	203.66	377
755	Ophionereis~dolabriformis~UF16870_WA_3s	Ophionereididae	Ophionereis	dolabriformis	UF16870	UF 16870	0	0	45915	1431	971	WA	116	6.52	307.55	402
756	Ophionereis~dubia~TOH255-IE.2007.4724_IN_3	Ophionereididae	Ophionereis	dubia	TOH255-IE.2007.4724	MNHN IE.2007.4724	0	0	45904	1431	444	IN	17	-25.02	47	395
757	Ophionereis~dubia~F193495_IP_3	Ophionereididae	Ophionereis	dubia	F193495	MV F193495	0	0	45985	1431	444	IP	11	-13.9	127.32	397
758	Ophionereis~dubia~TIM049_NWP_3	Ophionereididae	Ophionereis	dubia	TIM049	NSMT E-2893	0	0	45461	1431	444	NWP	na	na	na	396
759	Ophionereis~dubia~Aliwah1_SA_3	Ophionereididae	Ophionereis	dubia	Aliwah1	MV F237926	0	0	45598	1431	0	SA	14.5	-30.26	30.81	393
760	Ophionereis~fasciata~OFAS2a_NZ_3s	Ophionereididae	Ophionereis	fasciata	OFAS2a	NIWA 74366	0	0	45992	1431	674	NZ	73	-45.93	170.78	381
761	Ophionereis~fusca~SBD018436_IP_3	Ophionereididae	Ophionereis	fusca	SBD018436	MTQ SBD018436	0	0	45986	1428	0	IP	15.3	-13.06	143.8	415
762	Ophionereis~intermedia~TIM021_NWP_3	Ophionereididae	Ophionereis	intermedia	TIM021	NSMT E5055	0	0	45794	1431	0	NWP	1.75	na	na	391
763	Ophionereis~lineata~SBD011446_IP_3	Ophionereididae	Ophionereis	lineata	SBD011446	MTQ SBD011446	0	0	45979	1428	0	IP	73.55	-20.1	150.22	417
764	Ophionereis~novaezelandiae~OTERa_AU_3s	Ophionereididae	Ophionereis	novaezelandiae	OTERa	MV F159754	0	0	45953	1428	967	AU	350	-35.22	134.51	375
765	Ophionereis~novaezelandiae~ONZ2a_NZ_3s	Ophionereididae	Ophionereis	novaezelandiae	ONZ2a	NIWA 77676	1	0	45984	1428	967	NZ	44	-38.75	178.35	376
766	Ophionereis~olivacea~TIMX15_WA_3	Ophionereididae	Ophionereis	olivacea	TIMX15	UNAM-ICML	0	0	45887	1428	0	WA	1.5	22.38	270.33	411
767	Ophionereis~perplexa~TIM005_EP_3	Ophionereididae	Ophionereis	perplexa	TIM005	UNAM-ICML 3.7.7	0	0	45950	1431	0	EP	10.5	25.2	249.3	399
768	Ophionereis~porrecta~TOH245-IE.2007.4340_IN_3s	Ophionereididae	Ophionereis	porrecta	TOH245-IE.2007.4340	MNHN IE.2007.4340	0	0	45942	1431	606	IN	63	-25.63	45.95	412
769	Ophionereis~porrecta~F168754_IP_3	Ophionereididae	Ophionereis	porrecta	F168754	MV F168754	0	0	45973	1428	0	IP	53.75	-22.85	113.69	414
770	Ophionereis~porrecta~Aliwah2_SA_3	Ophionereididae	Ophionereis	porrecta	Aliwah2	MV F237927	0	0	45942	1431	0	SA	14.5	-30.26	30.81	413
771	Ophionereis~reticulata~COZ007_WA_3s	Ophionereididae	Ophionereis	reticulata	COZ007	UNAM-ICML 3.8.98	0	0	45944	1431	988	WA	3.3	20.48	273.02	407
772	Ophionereis~schayeri.A~OSED11a_AU_3s	Ophionereididae	Ophionereis	schayeri.A	OSED11a	MV F210879	1	0	45992	1428	988	AU	2	-37.07	149.91	385
773	Ophionereis~schayeri.B~OSWP3a_AU_3s	Ophionereididae	Ophionereis	schayeri.B	OSWP3a	MV F210828	0	0	45988	1428	689	AU	2.95	-40.83	147.64	387
774	Ophionereis~schayeri.C~OSMB5a_AU_3s	Ophionereididae	Ophionereis	schayeri.C	OSMB5a	MV F210821	0	0	45998	1428	668	AU	2.9	-41.16	146.35	386
775	Ophionereis~schayeri.D~OSNB10a_AU_3s	Ophionereididae	Ophionereis	schayeri.D	OSNB10a	MV F210816	0	0	45992	1428	988	AU	1.85	-32.73	152.14	384
776	Ophionereis~schayeri.E~OSTR1a_AU_3s	Ophionereididae	Ophionereis	schayeri.E	OSTR1a	MV F111542	0	0	45987	1428	555	AU	102	-31.72	115.24	383
777	Ophionereis~semoni~F193497_IP_3	Ophionereididae	Ophionereis	semoni	F193497	MV F193497	0	0	45664	1428	0	IP	73	-13.81	127.32	390
778	Ophionereis~sp~CEA045_WA_3s	Ophionereididae	Ophionereis	sp	CEA045	UNAM-ICML 3.128.12	0	0	45478	1428	988	WA	6	18.7	272.29	408
779	Ophionereis~sp1~COZ039_WA_3s	Ophionereididae	Ophionereis	sp1	COZ039	UNAM-ICML	0	0	46005	1431	551	WA	12.4	20.46	273.02	409
780	Ophionereis~sp2~F193450_IP_3s	Ophionereididae	Ophionereis	sp2	F193450	MV F193450	0	0	45671	1431	987	IP	81	-11.79	126.98	419
782	Ophionereis~squamulosa~TIM002_WA_3	Ophionereididae	Ophionereis	squamulosa	TIM002	UNAM-ICML	0	0	46000	1431	0	WA	0.5	21.26	273.25	410
783	Ophionereis~sykesi~IE.2007.5174_IP_3	Ophionereididae	Ophionereis	sykesi	IE.2007.5174	MNHN IE.2007.5174	0	0	45957	1428	0	IP	277	-19.7	158.5	374
784	Ophionereis~thryptica~TIM050_NWP_3	Ophionereididae	Ophionereis	thryptica	TIM050	NSMT E-2172-p01	1	0	45897	1431	0	NWP	na	na	na	394
785	Ophionereis~tigris~UF9889_IP_3	Ophionereididae	Ophionereis	tigris	UF9889	UF 9889	0	0	45860	1431	0	IP	12	-23.45	151.86	389
786	Ophionereis~variegata~TOH250-IE.2007.4629_IN_3	Ophionereididae	Ophionereis	variegata	TOH250-IE.2007.4629	MNHN IE.2007.4629	0	0	45737	1431	0	IN	27.5	-25.02	47.02	379
787	Ophionereis~variegata~UF9992_IP_3	Ophionereididae	Ophionereis	variegata	UF9992	UF 9992	0	0	45946	1419	0	IP	30	-23.43	152.03	378
788	Ophionereis~vittata~UF11856_WA_3s	Ophionereididae	Ophionereis	vittata	UF11856	UF 11856	0	0	45950	1431	751	WA	6	18.11	296.94	401
789	Ophionotus~hexactis~PS133.4_AN_3s	Ophiuridae	Ophionotus	hexactis	PS133.4	CAS	1	0	44822	1428	984	AN	1116.5	-65.333	305.758	1234
790	Ophionotus~hexactis~TM03_SK_3s	Ophiuridae	Ophionotus	hexactis	TM03	SAMC	0	0	45341	1431	984	SK	260.5	-46.89	37.58	1233
791	Ophionotus~victoriae~F168802_AN_3s	Ophiuridae	Ophionotus	victoriae	F168802	MV F168802	0	0	44450	1428	984	AN	770	-63.23	300.57	1237
794	Ophiopallas~brevispina~UF13021_IP_3s	Ophioleucidae	Ophiopallas	brevispina	UF13021	UF 13021	1	0	43619	1431	986	IP	460	-17.57	210.1	455
795	Ophiopallas~paradoxa~F162615_IP_3	Ophioleucidae	Ophiopallas	paradoxa	F162615	MV F162615	1	0	44294	1419	0	IP	400	-17.19	119.56	453
796	Ophiopallas~valens~IE.2007.5233_IP_3	Ophiodermatidae	Ophiopallas	valens	IE.2007.5233	MNHN IE.2007.5233	1	0	45363	1428	0	IP	309.5	-20.77	160.97	697
799	Ophioperla~koehleri~F167524_SM_3	Ophiopyrgidae	Ophioperla	koehleri	F167524	MV F167524	1	0	45935	1428	0	SM	199	-53.77	318.62	1179
800	Ophiopeza~cylindrica~MVF214036_AU_3s	Ophiopezidae	Ophiopeza	cylindrica	MVF214036	MV F214036	0	0	40187	1431	985	AU	3.5	-38.3182	144.714	741
802	Ophiopeza~fallax~Aliwah9_SA_3	Ophiopezidae	Ophiopeza	fallax	Aliwah9	MV F237928	0	0	45836	1419	0	SA	14.5	-30.26	30.81	744
803	Ophiopeza~spinosa~F109843_IP_3	Ophiopezidae	Ophiopeza	spinosa	F109843	MV F109843	0	0	45774	1410	0	IP	3.5	-14.68	145.47	750
804	Ophiopholis~aculeata~F214041_AR_3	Ophiopholidae	Ophiopholis	aculeata	F214041	MV F214041	0	0	34161	1428	0	AR	248	70.26	22.48	158
807	Ophiopholis~brachyactis~TIM035_NWP_3	Ophiopholidae	Ophiopholis	brachyactis	TIM035	NSMT E5037	1	0	42652	1425	0	NWP	300	na	na	161
809	Ophiopholis~japonica~TIM037_NWP_3	Ophiopholidae	Ophiopholis	japonica	TIM037	NSMT E7437	0	0	42742	1422	0	NWP	169	na	na	155
810	Ophiopholis~kennerlyi~UF11357_NEP_3	Ophiopholidae	Ophiopholis	kennerlyi	UF11357	UF 11357	1	0	43141	1431	0	NEP	na	43.334	235.626	154
811	Ophiopholis~longispina~SIO.E4640_NEP_3	Ophiopholidae	Ophiopholis	longispina	SIO.E4640	SIO E4640	0	0	43164	1425	0	NEP	813	44.67	234.901	160
812	Ophiophragmus~filograneus~MVF193480_WA_3s	Amphiuridae	Ophiophragmus	filograneus	MVF193480	MV F193480	0	0	43100	1417	983	WA	0.5	29.147	276.963	111
813	Ophiophragmus~wurdemanii~MVF193481_WA_3s	Amphiuridae	Ophiophragmus	wurdemanii	MVF193481	MV F193481	0	0	38905	1431	983	WA	0.5	29.147	276.963	110
814	Ophiophrixus~confinis~IE.2009.1713_IP_3	Ophiobyrsidae	Ophiophrixus	confinis	IE.2009.1713	MNHN IE.2009.1713	1	0	44946	1428	0	IP	286	-13.35	183.85	642
815	Ophiophrura~liodisca~MVF188883_NZ_3s	Ophioscolecidae3	Ophiophrura	liodisca	MVF188883	MV F188883	1	0	42546	1431	986	NZ	1416.5	-36.32	178.056	816
817	Ophiophthalmus~relictus~F144738_AU_3s	Ophiacanthidae	Ophiophthalmus	relictus	F144738	MV F144738	0	0	45455	1431	985	AU	930	-44.03	147.57	572
818	Ophiophycis~johni~XXXb_NZ_3s	Astrophiuridae	Ophiophycis	johni	XXXb	NIWA	0	0	33696	1431	992	NZ	1464.5	-36.803	177.481	1024
819	Ophiophycis~mirabilis~7.4182_IN_3	Astrophiuridae	Ophiophycis	mirabilis	7.4182	MNHN IE.2007.4182	1	0	44961	1431	0	IN	444.5	-25.61	46.33	1022
820	Ophiophycis~richardi~F227629_AU_3	Astrophiuridae	Ophiophycis	richardi	F227629	MV F227629	0	0	38282	1419	0	AU	1402	-34.77	131.8	1023
821	Ophioplax~custos~BP81_IP_3	Ophionereididae	Ophioplax	custos	BP81	MNHN IE.2007.2943	1	0	45989	1428	0	IP	271	-4.317	152.317	362
824	Ophioplax~lamellosa~MVF188885_NZ_3s	Ophionereididae	Ophioplax	lamellosa	MVF188885	MV F188885	0	0	37131	1431	985	NZ	935	-36.454	177.838	359
825	Ophioplax~sp.nov~IE.2007.6953_IP_3	Ophionereididae	Ophioplax	sp.nov	IE.2007.6953	MNHN IE.2007.6953	0	0	45373	1428	0	IP	474.5	-22.35	171.64	365
826	Ophioplax~spnov3~SBD010662_IP_3	Ophionereididae	Ophioplax	spnov3	SBD010662	MTQ SBD010662	0	0	45919	1419	0	IP	33.85	-23.41	151.93	366
828	Ophiopleura~inermis~MVF193434_NZ_3s	Ophiopyrgidae	Ophiopleura	inermis	MVF193434	MV F193434	0	0	34732	1431	986	NZ	935	-36.454	177.838	1181
829	Ophioplexa~condita~CAS161442_AN_3	Ophioscolecidae3	Ophioplexa	condita	CAS161442	CAS 161442	1	0	45366	1431	0	AN	4544.5	-62.96	332.13	809
830	Ophioplinthaca~amezianeae~F239697_IP_3s	Ophiacanthidae	Ophioplinthaca	amezianeae	F239697	MV F239697	0	0	45610	1197	985	IP	2346	-25.32	154.06	534
831	Ophioplinthaca~citata~F159611_IP_3s	Ophiacanthidae	Ophioplinthaca	citata	F159611	MV F159611	0	0	45916	874	986	IP	390	-13.26	123.37	529
833	Ophioplinthaca~globata~BP32_IP_3	Ophiacanthidae	Ophioplinthaca	globata	BP32	MNHN	0	0	44989	1036	0	IP	616.5	-6.02	147.58	532
834	Ophioplinthaca~hastata~BP30_IP_3s	Ophiacanthidae	Ophioplinthaca	hastata	BP30	MNHN	1	0	45678	906	985	IP	616.5	-6.02	147.58	528
835	Ophioplinthaca~plicata~F227377_AU_3s	Ophiacanthidae	Ophioplinthaca	plicata	F227377	MV F227377	0	0	44855	1419	985	AU	1695.5	-34.72	130.67	537
836	Ophioplinthaca~plicata~MVF188868_NZ_3s	Ophiacanthidae	Ophioplinthaca	plicata	MVF188868	MV F188868	0	0	34778	1431	985	NZ	888.5	-36.445	177.839	538
837	Ophioplinthaca~pulchra~F159607_IP_3	Ophiacanthidae	Ophioplinthaca	pulchra	F159607	MV F159607	0	0	45735	1197	0	IP	404.5	-17.04	119.66	526
838	Ophioplinthaca~rudis~TOH279-IE.2014.2052_IN_3s	Ophiacanthidae	Ophioplinthaca	rudis	TOH279-IE.2014.2052	MNHN IE.2014.2052	0	0	45831	1311	534	IN	988.5	-25.65	44.26	530
839	Ophioplinthaca~rudis~BP31_IP_3s	Ophiacanthidae	Ophioplinthaca	rudis	BP31	MNHN	0	0	45870	1413	734	IP	1204.5	-2.73	150	531
840	Ophioplinthaca~sarsii~TOH3-MNHN_SK_3	Ophiacanthidae	Ophioplinthaca	sarsii	TOH3-MNHN	MNHN IE.2013.16082	0	0	45713	1056	0	SK	1744	-44.32	44.96	535
841	Ophioplinthaca~sp1~NIWA72065_NZ_3s	Ophiacanthidae	Ophioplinthaca	sp1	NIWA72065	NIWA 72065	1	0	45797	1185	985	NZ	1579.5	-36.5	177.87	533
842	Ophioplinthaca~sp2~NA064.027.01.04.A_EP_3	Ophiacanthidae	Ophioplinthaca	sp2	NA064.027.01.04.A		0	0	45892	1419	0	EP	1273	1.6721	268.315	536
843	Ophioplinthus~accomodata~F159722_IP_3	Ophiopyrgidae	Ophioplinthus	accomodata	F159722	MV F159722	0	0	45193	1428	0	IP	998.5	-16.63	119.15	1160
844	Ophioplinthus~accomodata~NIWA39573_NZ_3	Ophiopyrgidae	Ophioplinthus	accomodata	NIWA39573	NIWA 39573	1	0	45934	1119	0	NZ	1322.5	-48.54	164.96	1166
845	Ophioplinthus~anceps~CAS161426_AN_3	Ophiopyrgidae	Ophioplinthus	anceps	CAS161426	CAS 161426	0	0	45960	1428	0	AN	2896	-60.64	306.04	1151
846	Ophioplinthus~brevirima~CAS161420_AN_3	Ophiopyrgidae	Ophioplinthus	brevirima	CAS161420	CAS 161420	0	0	45873	1428	0	AN	353.5	-60.96	304.88	1150
847	Ophioplinthus~cf.inornata~BP59_IP_3s	Ophiopyrgidae	Ophioplinthus	cf.inornata	BP59	MNHN IE.2007.2929	1	0	45921	1431	986	IP	497.5	-2.23	150.27	1159
848	Ophioplinthus~cf.tuberosa~PS046.7_AN_3s	Ophiopyrgidae	Ophioplinthus	cf.tuberosa	PS046.7	CAS	0	0	45229	1431	744	AN	2893.5	-60.6392	306.044	1163
849	Ophioplinthus~gelida~CAS161550_AN_3	Ophiopyrgidae	Ophioplinthus	gelida	CAS161550	CAS 161550	0	0	45936	1428	0	AN	359.5	-61.82	301.41	1156
850	Ophioplinthus~gelida~TOH88-IE.2013.16269_SK_3	Ophiopyrgidae	Ophioplinthus	gelida	TOH88-IE.2013.16269	MNHN IE.2013.16269	0	0	45884	1431	0	SK	52	-48.68	69.06	1154
852	Ophioplinthus~intorta~TM05_SK_3	Ophiopyrgidae	Ophioplinthus	intorta	TM05	SAMC	0	0	45891	1431	0	SK	142	-46.94	37.9	1158
853	Ophioplinthus~martensi~CAS161041_AN_3	Ophiopyrgidae	Ophioplinthus	martensi	CAS161041	CAS 161041	0	0	45869	1428	0	AN	190	-61.06	305.38	1157
854	Ophioplinthus~martensi~PS140.7b_SM_3s	Ophiopyrgidae	Ophioplinthus	martensi	PS140.7b	CAS	0	0	45788	1428	744	SM	2951.5	-58.267	335.104	1162
855	Ophioplinthus~medusa~CAS161434_AN_3	Ophiopyrgidae	Ophioplinthus	medusa	CAS161434	CAS 161434	0	0	45501	1431	0	AN	4544.5	-62.96	332.13	1142
856	Ophioplinthus~mordax~PS143.2b_SM_3	Ophiopyrgidae	Ophioplinthus	mordax	PS143.2b	CAS	0	0	45954	1428	0	SM	774	-58.739	334.825	1164
857	Ophioplinthus~partita~PS094.1_AN_3	Ophiopyrgidae	Ophioplinthus	partita	PS094.1	CAS	0	0	45916	1428	0	AN	3970	-60.512	303.913	1146
858	Ophioplinthus~relegata~PS045.1_AN_3	Ophiopyrgidae	Ophioplinthus	relegata	PS045.1	CAS	0	0	45874	1431	0	AN	232.5	-60.986	304.81	1161
859	Ophioplinthus~scissa~CAS161436_AN_3	Ophiopyrgidae	Ophioplinthus	scissa	CAS161436	CAS 161436	0	0	45415	1431	0	AN	2085.5	-65.29	306.61	1143
860	Ophioplinthus~scissa~PS140.7a_SM_3	Ophiopyrgidae	Ophioplinthus	scissa	PS140.7a	CAS	0	0	45503	1431	0	SM	2951.5	-58.267	335.104	1144
861	Ophioplinthus~sp~PS132.3_AN_3s	Ophiopyrgidae	Ophioplinthus	sp	PS132.3	CAS	0	0	45363	1431	986	AN	2085.5	-65.298	306.619	1145
864	Ophioplinthus~tumescens~2009.6323_AN_3	Ophiopyrgidae	Ophioplinthus	tumescens	2009.63	MNHN IE.2009.6323	1	0	45955	1431	0	AN	437	-66.01	142.71	1149
865	Ophioplocus~bispinosus~MVF214038_AU_3s	Ophioplocidae	Ophioplocus	bispinosus	MVF214038	MV F214038	0	0	37815	1431	990	AU	1	-38.67	145.667	325
866	Ophioplocus~declinans~BP61_IP_3s	Ophioplocidae	Ophioplocus	declinans	BP61	MNHN	0	0	44698	1431	988	IP	410	-6.05	147.6	331
867	Ophioplocus~esmarki~F125398.2_NEP_3	Ophioplocidae	Ophioplocus	esmarki	F125398.2	MV F125398	0	0	45714	1419	0	NEP	na	36.63	238.08	320
868	Ophioplocus~giganteus~UF3965_IP_3	Ophioplocidae	Ophioplocus	giganteus	UF3965	UF 3965	0	0	45830	1431	0	IP	20.5	26.72	127.83	322
869	Ophioplocus~hancocki~UF4377_EP_3	Ophioplocidae	Ophioplocus	hancocki	UF4377	UF 4377	0	0	45701	1431	0	EP	18.5	8.24	281.12	319
870	Ophioplocus~imbricatus~F168030_AU_3	Ophioplocidae	Ophioplocus	imbricatus	F168030	MV F168030	0	0	45859	1428	442	AU	2.5	-34.39	119.4	324
872	Ophioplocus~imbricatus~PMCP1517_IP_3	Ophioplocidae	Ophioplocus	imbricatus	PMCP1517	WAM	0	0	45791	1428	442	IP	16	-21.11	115.53	323
873	Ophioplocus~incipiens~F168826_AN_3s	Ophioplocidae	Ophioplocus	incipiens	F168826	MV F168826	0	0	42930	1431	986	AN	262.5	-60.75	316.32	338
875	Ophioplocus~januarii~TANIA3.238.0_SM_3	Ophioplocidae	Ophioplocus	januarii	TANIA3.238.0	UNAM-ICML 3.238.0	0	0	45769	1419	0	SM	16	-40.94	294.9	330
876	Ophioplocus~marginata~74487_NZ_3	Ophioplocidae	Ophioplocus	marginata	74487	NIWA 74487	1	0	45872	1431	0	NZ	45.5	-46.71	167.98	318
877	Ophiopristis~cf.alberti~F227921_AU_3s	Ophiotretidae	Ophiopristis	cf.alberti	F227921	MV F227921	0	0	42068	1428	607	AU	1500	-34.52	130.66	629
878	Ophiopristis~luctosa~F167996_IP_3	Ophiotretidae	Ophiopristis	luctosa	F167996	MV F167996	0	0	45945	1419	0	IP	200	-17.43	120.43	615
879	Ophiopristis~procera~BP28_IP_3	Ophiotretidae	Ophiopristis	procera	BP28	MNHN IE.2007.2839	0	0	45951	1428	0	IP	271	-4.32	152.32	616
880	Ophiopristis~spMoV5490~F227598_AU_3s	Ophiotretidae	Ophiopristis	spMoV5490	F227598	MV F227598	0	0	44949	1428	983	AU	987.5	-34.7	132.53	631
881	Ophiopsammium~semperi~SBD009102_IP_3	Ophiotrichidae	Ophiopsammium	semperi	SBD009102	MTQ SBD009102	0	0	43680	1422	0	IP	14.6	-21.45	149.53	202
882	Ophiopsammus~aequalis~IE.2007.7149_IP_3s	Ophiodermatidae	Ophiopsammus	aequalis	IE.2007.7149	MNHN IE.2007.7149	0	0	45736	1428	791	IP	356	-22.27	168.69	703
883	Ophiopsammus~angusta~F146229_AU_3s	Ophiodermatidae	Ophiopsammus	angusta	F146229	MV F146229	0	0	45945	1431	753	AU	208.5	-43.97	147.53	704
884	Ophiopsammus~assimilis~F95871_AU_3	Ophiodermatidae	Ophiopsammus	assimilis	F95871	MV F95871	0	0	45667	1431	0	AU	3	-33.92	151.25	706
885	Ophiopsammus~maculata~MVF193446_NZ_3s	Ophiodermatidae	Ophiopsammus	maculata	MVF193446	MV F193446	0	0	24850	1431	985	NZ	6.5	-41.351	174.767	705
886	Ophiopsammus~yoldi~SBD018421_IP_3s	Ophiodermatidae	Ophiopsammus	yoldi	SBD018421	MTQ SBD018421	0	0	41965	1428	985	IP	11.45	-21.02	149.25	707
887	Ophiopsammus~yoldii~F173894_IP_3s	Ophiodermatidae	Ophiopsammus	yoldii	F173894	MV F173894	1	0	45529	1428	985	IP	40.1	-12.31	130.06	708
888	Ophiopsila~hartmeyeri~UF5949_WA_3s	Ophiopsilidae	Ophiopsila	hartmeyeri	UF5949	UF 5949	0	0	42550	1428	984	WA	31	30	274	273
889	Ophiopsila~multipapillata~IE.2007.5421_IP_3	Ophiopsilidae	Ophiopsila	multipapillata	IE.2007.5421	MNHN IE.2007.5421	0	0	43671	1419	0	IP	309.5	-20.77	160.97	280
890	Ophiopsila~multispina~SBD001271_IP_3	Ophiopsilidae	Ophiopsila	multispina	SBD001271	MTQ SBD001271	0	0	43175	1428	0	IP	17.4	-19.23	147.3	281
891	Ophiopsila~novaezealandiae~32247_NZ_3	Ophiopsilidae	Ophiopsila	novaezealandiae	32247	NIWA 32247	1	0	43492	1431	0	NZ	652.5	-40.02	178.18	279
892	Ophiopsila~pantherina~KGR23379_IP_3	Ophiopsilidae	Ophiopsila	pantherina	KGR23379	WAM	0	0	43226	1431	0	IP	11	-13.9	127.32	277
893	Ophiopsila~polyacantha~TOH207-IE.2007.610_IP_3	Ophiopsilidae	Ophiopsila	polyacantha	TOH207-IE.2007.610	MNHN IE.2007.610	0	0	27056	1299	0	IP	405	9.5	123.69	274
894	Ophiopsila~seminuda~7.4235_IN_3	Ophiopsilidae	Ophiopsila	seminuda	7.4235	MNHN IE.2007.4235	0	0	40742	1419	0	IN	64.5	-25.28	46.56	271
895	Ophiopsila~timida~7.4163_IN_3	Ophiopsilidae	Ophiopsila	timida	7.4163	MNHN IE.2007.4163	1	0	43003	1431	0	IN	64.5	-25.28	46.56	276
897	Ophiopteris~antipodum~75641_NZ_3	Ophiopteridae	Ophiopteris	antipodum	75641	NIWA 75641	1	0	45864	1425	0	NZ	82	-37.62	178.92	595
898	Ophiopteris~papillosa~OPMB2a_NEP_3	Ophiopteridae	Ophiopteris	papillosa	OPMB2a	MV F125399	1	0	45836	1425	0	NEP	na	36.63	238.08	596
899	Ophiopteron~elegans~F165956_IP_3	Ophiotrichidae	Ophiopteron	elegans	F165956	MV F165956	0	0	44779	1308	0	IP	100	-20.2	115.13	218
900	Ophiopyrgus~saccharatus~F227689_AU_3s	Ophiopyrgidae	Ophiopyrgus	saccharatus	F227689	MV F227689	1	0	45494	1431	986	AU	1000	-34.81	132.69	1075
901	Ophiopyrgus~saccharatus~BP45_IP_3s	Ophiopyrgidae	Ophiopyrgus	saccharatus	BP45	MNHN	0	0	45736	1431	986	IP	319.5	-4	153.6	1076
902	Ophioscolex~cf.inermis~F146330_AU_3	Ophioscolecidae	Ophioscolex	cf.inermis	F146330	MV F146330	0	0	39366	1431	0	AU	1200	-44.24	147.12	841
906	Ophioscolex~sp~F239757_AU_3s	Ophioscolecidae	Ophioscolex	sp	F239757	MV F239757	0	0	40268	1431	989	AU	2473.5	-30.09	153.89	842
908	Ophioscolex~spMoV2721~BP05_IP_3s	Ophioscolecidae	Ophioscolex	spMoV2721	BP05	MNHN IE.2007.2898	0	0	40779	1431	855	IP	892.5	-7.38	147.57	844
910	Ophiosmilax~sp~IE.2207.6967_IP_3	Ophiobyrsidae	Ophiosmilax	sp	IE.2207.6967	MNHN IE.2007.6967	1	0	37310	1431	0	IP	672.5	-19.74	165.75	643
911	Ophiosparte~gigas~2009.4742_AN_3	Ophiopyrgidae	Ophiosparte	gigas	2009.47	MNHN IE.2009.4742	1	0	45848	1428	0	AN	661.5	-66.66	143.61	1173
912	Ophiosphaera~insignis~IE.2007.7571_IP_3	Amphiuridae	Ophiosphaera	insignis	IE.2007.7571	MNHN IE.2007.7571	0	0	45723	1419	0	IP	361	-19.73	158.58	102
913	Ophiosphalma~armigerum~F227626_AU_3s	Ophiosphalmidae	Ophiosphalma	armigerum	F227626	MV F227626	0	0	44235	1428	662	AU	2727	-34.07	129.18	988
914	Ophiosphalma~armigerum~F222693_EA_3s	Ophiosphalmidae	Ophiosphalma	armigerum	F222693	MV F222693	0	0	44422	1428	662	EA	3083	-4.27	347.62	989
915	Ophiosphalma~glabrum~104.016_EP_3	Ophiosphalmidae	Ophiosphalma	glabrum	104.016	BMNH	0	1	44631	1428	0	EP	4130	13.507	116.589	980
916	Ophiosphalma~cf.glabrum~104.002_EP_3	Ophiosphalmidae	Ophiosphalma	cf.glabrum	104.002	BMNH	0	1	44575	1428	0	EP	4130	13.507	116.589	979
917	Ophiosphalma~corticosum~F239695_IP_3	Ophiosphalmidae	Ophiosphalma	corticosum	F239695	MV F239695	0	0	43047	1431	0	IP	2346	-25.32	154.06	991
918	Ophiosphalma~elegans~BP71_IP_3	Ophiosphalmidae	Ophiosphalma	elegans	BP71	MNHN IE.2007.2921	1	0	44693	1230	0	IP	587	-8.25	150.75	984
919	Ophiosphalma~fimbriatum~F239727_AU_3s	Ophiosphalmidae	Ophiosphalma	fimbriatum	F239727	MV F239727	0	0	44186	1428	724	AU	2534.5	-32.57	153.16	987
920	Ophiosphalma~fimbriatum~F159671_IP_3s	Ophiosphalmidae	Ophiosphalma	fimbriatum	F159671	MV F159671	0	0	44563	1428	724	IP	2110	-27.43	160.53	986
922	Ophiosphalma~laqueatum~F162649_IP_3	Ophiosphalmidae	Ophiosphalma	laqueatum	F162649	MV F162649	1	0	44925	1419	0	IP	197.7	-14.97	121.66	994
923	Ophiosphalma~monoplax~TIM003_WA_3	Ophiosphalmidae	Ophiosphalma	monoplax	TIM003	UNAM-ICML 3.212.4	0	0	38258	1431	0	WA	640	22.69	269.23	992
924	Ophiosphalma~properum~TOH275-IE.2007.4333_IN_3	Ophiosphalmidae	Ophiosphalma	properum	TOH275-IE.2007.4333	MNHN IE.2007.4333	0	0	44039	1428	0	IN	865.5	-25.58	44.25	983
925	Ophiosphalma~properum~BP72_IP_3	Ophiosphalmidae	Ophiosphalma	properum	BP72	MNHN	0	0	44218	1431	0	IP	858	-5.35	145.9	982
926	Ophiosphalma~serratum~TIM007_WA_3	Ophiosphalmidae	Ophiosphalma	serratum	TIM007	UNAM-ICML 3.130.6	0	0	37836	1428	0	WA	620	23.86	272.83	976
927	Ophiosphalma~valdiviae~TOH264-IE.2014.2017_IP_3	Ophiosphalmidae	Ophiosphalma	valdiviae	TOH264-IE.2014.2017	MNHN IE.2014.2017	0	0	44932	1428	0	IP	964	20.1	116.13	985
929	Ophiosteira~debitor~2009.6717_AN_3	Ophiopyrgidae	Ophiosteira	debitor	2009.67	MNHN IE.2009.6717	0	0	45944	1428	0	AN	404	-65.5	139.35	1187
930	Ophiosteira~echinulata~2009.6365_AN_3	Ophiopyrgidae	Ophiosteira	echinulata	2009.64	MNHN IE.2009.6365	0	0	45966	1428	0	AN	466	-66	143.31	1184
931	Ophiosteira~rotundata~2009.6718_AN_3	Ophiopyrgidae	Ophiosteira	rotundata	2009.67	MNHN IE.2009.6718	0	0	45953	1428	0	AN	404	-65.5	139.35	1185
932	Ophiostiba~sp~F173909_IP_3	Ophiomyxidae	Ophiostiba	sp	F173909	MV F173909	1	0	45871	1419	0	IP	55.45	-10.45	129.52	770
933	Ophiostigma~isocanthum~UF17060_WA_3	Amphiuridae	Ophiostigma	isocanthum	UF17060	UF 17060	0	0	43941	1428	0	WA	57	5.61	307.83	105
934	Ophiostigma~siva~UF13880_WA_3	Amphiuridae	Ophiostigma	siva	UF13880	UF 13880	0	0	44253	1419	0	WA	17	16.03	298.23	104
935	Ophiostriatus~atlanticus~UF10830_WA_3	Ophioleucidae	Ophiostriatus	atlanticus	UF10830	UF 10830	0	0	37223	1407	0	WA	19	29.02	276.41	433
936	Ophiostriatus~bispinosus~IE.2007.7037_IP_3	Ophioleucidae	Ophiostriatus	bispinosus	IE.2007.7037	MNHN IE.2007.7037	1	0	39671	1428	0	IP	680	-22.88	169.41	432
937	Ophioteichus~multispinum~SBD012770_IP_3	Ophiolepididae	Ophioteichus	multispinum	SBD012770	MTQ SBD012770	0	0	45865	1428	0	IP	41.1	-21.15	151.82	307
938	Ophiothamnus~affinis~F214045_NEA_3	Ophiothamnidae	Ophiothamnus	affinis	F214045	MV F214045	0	0	39207	981	0	NEA	1383	46.25	355.28	130
939	Ophiothamnus~biocal~BP36_IP_3	Ophiothamnidae	Ophiothamnus	biocal	BP36	MNHN	0	0	26905	1079	0	IP	271	-4.32	152.32	131
940	Ophiothamnus~habrotatus~W13007185_AU_3	Ophiothamnidae	Ophiothamnus	habrotatus	W13007185	SAM	1	0	38766	1422	0	AU	235	-35.0378	134.093	132
941	Ophiothamnus~remotus~A73875_SA_3	Ophiothamnidae	Ophiothamnus	remotus	A73875	SAMC MB-A73875	0	0	33152	1098	0	SA	189	-36.65	20.5	133
942	Ophiothela~danae~J24839_IP_3	Ophiotrichidae	Ophiothela	danae	J24839	AM J24839	0	0	44085	1422	0	IP	14.5	-29.24	182.12	206
943	Ophiothela~mirabilis~TANIA610_EP_3	Ophiotrichidae	Ophiothela	mirabilis	TANIA610	UNAM-ICML 3.138.36	0	0	44794	1431	0	EP	2	19.54	254.89	205
944	Ophiothela~mirabilis~UF16885_WA_3	Ophiotrichidae	Ophiothela	mirabilis	UF16885	UF 16885	0	0	43285	1431	0	WA	84	6.43	307.57	204
945	Ophiothela~tigris~UF7611_IN_3	Ophiotrichidae	Ophiothela	tigris	UF7611	UF 7611	0	0	43822	1431	0	IN	6	-13.41	48.3	200
946	Ophiothela~venusta~7.4207_IN_3	Ophiotrichidae	Ophiothela	venusta	7.4207	MNHN IE.2007.4207	0	0	44213	1431	0	IN	142.5	-25.05	44	201
947	Ophiothela~vincula~KGR23129_IP_3s	Ophiotrichidae	Ophiothela	vincula	KGR23129	WAM	0	0	44259	1431	990	IP	25.5	-13.82	127.26	203
948	Ophiotholia~sp~AB02.CS.02_EP_3	Ophiohelidae	Ophiotholia	sp	AB02.CS.02	BMNH	1	1	34893	1428	0	EP	4158	12.367	243.483	830
949	Ophiotholia~spathifer~NIWA14067_NZ_3s	Ophiohelidae	Ophiotholia	spathifer	NIWA14067	NIWA 14067	1	0	37692	1428	682	NZ	2676.5	-39	179.31	817
950	Ophiothrix~abstinens~F166009_IP_3s	Ophiotrichidae	Ophiothrix	abstinens	F166009	MV F166009	0	0	44189	1419	990	IP	100	-15.08	121.75	219
951	Ophiothrix~angulata~MVF193476_WA_3s	Ophiotrichidae	Ophiothrix	angulata	MVF193476	MV F193476	1	0	44678	1431	991	WA	3	26.783	279.956	242
952	Ophiothrix~aristulata~F227337_AU_3	Ophiotrichidae	Ophiothrix	aristulata	F227337	MV F227337	0	0	40066	1410	0	AU	168	-43.98	147.29	232
956	Ophiothrix~aristulata~A73802_SA_3	Ophiotrichidae	Ophiothrix	aristulata	A73802	SAMC MB-A73802	0	0	45585	1422	0	SA	222	-36.41	20.2	229
957	Ophiothrix~armata~F109891_IP_3	Ophiotrichidae	Ophiothrix	armata	F109891	MV F109891	0	0	44320	1419	0	IP	3	-14.69	145.43	220
958	Ophiothrix~caespitosa~MVF214044_AU_3s	Ophiotrichidae	Ophiothrix	caespitosa	MVF214044	MV F214044	1	0	43452	1431	990	AU	3.5	-38.3182	144.714	223
961	Ophiothrix~cf.galapagensis~TANIA410_WA_3	Ophiotrichidae	Ophiothrix	cf.galapagensis	TANIA410	UNAM-ICML 3.211.0	0	0	45562	1413	0	WA	100	22.1692	268.447	247
962	Ophiothrix~cf.vitrea~OAT2_IN_3	Ophiotrichidae	Ophiothrix	cf.vitrea	OAT2	MNHN IE.2007.4065	0	0	45701	1419	0	IN	142	-25.25	47.28	192
963	Ophiothrix~ciliaris~F193452_IP_3	Ophiotrichidae	Ophiothrix	ciliaris	F193452	MV F193452	1	0	44830	1431	0	IP	23.3	-11.22	134.74	222
964	Ophiothrix~crassispina~F165984_IP_3	Ophiotrichidae	Ophiothrix	crassispina	F165984	MV F165984	0	0	40592	1020	0	IP	200	-15.01	121.63	216
965	Ophiothrix~deceptor~F93774_IP_3	Ophiotrichidae	Ophiothrix	deceptor	F93774	MV F93774	0	0	43617	1413	0	IP	4.5	-12.21	123	213
966	Ophiothrix~echinotecta~A81601_SA_3	Ophiotrichidae	Ophiothrix	echinotecta	A81601	SAMC MB-A81601	0	0	24621	1422	0	SA	23.9	-27.45	32.71	244
967	Ophiothrix~exigua~F173951_IP_3	Ophiotrichidae	Ophiothrix	exigua	F173951	MV F173951	0	0	44562	1419	0	IP	27.8	-11.22	134.75	217
968	Ophiothrix~fragilis~F92218_NEA_3s	Ophiotrichidae	Ophiothrix	fragilis	F92218	MV F92218	1	0	44762	1425	508	NEA	na	na	na	233
970	Ophiothrix~galapagensis~TANIA409_EP_3	Ophiotrichidae	Ophiothrix	galapagensis	TANIA409	UNAM-ICML 3.108.4	0	0	45250	1425	0	EP	27.8	25.11	249.48	246
971	Ophiothrix~lepidus~IE.2007.39_IP_3	Ophiotrichidae	Ophiothrix	lepidus	IE.2007.39	MNHN IE.2007.39	0	0	45110	1422	0	IP	286	-24.7	159.7	163
972	Ophiothrix~lineata~UF7818_WA_3	Ophiotrichidae	Ophiothrix	lineata	UF7818	UF 7818	0	0	45093	1431	0	WA	1	na	na	238
973	Ophiothrix~magnifica~TANIA244_EP_3	Ophiotrichidae	Ophiothrix	magnifica	TANIA244	CZA E004	0	0	45296	1431	0	EP	na	-6.95	279.28	240
974	Ophiothrix~martensi~10003991_IP_3	Ophiotrichidae	Ophiothrix	martensi	10003991	WAM	0	0	45105	1428	0	IP	50.2	-14	125	191
975	Ophiothrix~oerstedii~UF10231_WA_3	Ophiotrichidae	Ophiothrix	oerstedii	UF10231	UF 10231	0	0	45730	1431	0	WA	6	24.76	279.24	243
976	Ophiothrix~oliveri~MK1a_NZ_3	Ophiotrichidae	Ophiothrix	oliveri	MK1a	AM J24933	0	0	45073	1404	0	NZ	21	-30.22	181.56	165
977	Ophiothrix~proteus~F109838_IP_3s	Ophiotrichidae	Ophiothrix	proteus	F109838	MV F109838	0	0	44969	1419	990	IP	15	-14.66	145.43	221
979	Ophiothrix~purpurea~WAM.D118_IP_3	Ophiotrichidae	Ophiothrix	purpurea	WAM.D118	WAM	1	0	44827	1407	0	IP	97.25	-22.636	113.569	212
980	Ophiothrix~purpurea~Aliwah3_SA_3	Ophiotrichidae	Ophiothrix	purpurea	Aliwah3	MV F237929	0	0	45074	1413	0	SA	14.5	-30.26	30.81	215
981	Ophiothrix~rudis~TANIA413_EP_3	Ophiotrichidae	Ophiothrix	rudis	TANIA413	UNAM-ICML 3.31.34	0	0	45151	1425	0	EP	2	18.05	257.34	236
982	Ophiothrix~smaragdina~10007388_IP_3s	Ophiotrichidae	Ophiothrix	smaragdina	10007388	WAM	0	0	45180	1413	990	IP	22.8	-14	126	173
983	Ophiothrix~sp~IE.2007.6791_IP_3	Ophiotrichidae	Ophiothrix	sp	IE.2007.6791	MNHN IE.2007.6791	0	0	44099	1428	0	IP	236	-22.21	167.09	224
984	Ophiothrix~spiculata~TIM008_EP_3s	Ophiotrichidae	Ophiothrix	spiculata	TIM008	UNAM-ICML	0	0	44534	1431	991	EP	5	18.35	256.48	239
985	Ophiothrix~spMoV5502~F165994_IP_3	Ophiotrichidae	Ophiothrix	spMoV5502	F165994	MV F165994	0	0	44234	1431	0	IP	103	-16.75	121.04	194
986	Ophiothrix~spongicola~F193440_AU_3	Ophiotrichidae	Ophiothrix	spongicola	F193440	MV F193440	0	0	45504	1431	0	AU	4.9	-35.58	138.6	190
987	Ophiothrix~stri~TANIA612_WA_3	Ophiotrichidae	Ophiothrix	stri	TANIA612	UNAM-ICML	0	0	45196	1431	0	WA	na	9.73	277.18	237
988	Ophiothrix~suensoni~UF11644_WA_3	Ophiotrichidae	Ophiothrix	suensoni	UF11644	UF 11644	0	0	44290	1431	0	WA	28	28.65	275.61	245
989	Ophiothrix~triglochis~A65818_SA_3s	Ophiotrichidae	Ophiothrix	triglochis	A65818	SAMC MB-A65818	0	0	44777	1422	508	SA	na	-33.8991	18.4087	235
990	Ophiothrix~vetusta~IE.2007.6906_IP_3	Ophiotrichidae	Ophiothrix	vetusta	IE.2007.6906	MNHN IE.2007.6906	0	0	44309	1428	0	IP	382	-18.64	164.32	226
991	Ophiothrix~vitrea~F166014_IP_3	Ophiotrichidae	Ophiothrix	vitrea	F166014	MV F166014	0	0	45713	1419	0	IP	96	-12.44	123.6	193
992	Ophiothyreus~goesi~UF13929_WA_3	na3	Ophiothyreus	goesi	UF13929	UF 13929	1	0	44945	1431	0	WA	160	16.4	298.45	422
993	Ophiotoma~alberti~CAS161432_AN_3s	Ophiotretidae	Ophiotoma	alberti	CAS161432	CAS 161432	1	0	45288	1428	734	AN	4544.5	-62.96	332.13	628
994	Ophiotoma~assimilis~BP24_IP_3s	Ophiotretidae	Ophiotoma	assimilis	BP24	MNHN	1	0	45921	1428	983	IP	852.5	-2.68	150.05	624
995	Ophiotoma~bartletti~UF16744_WA_3	Ophiotretidae	Ophiotoma	bartletti	UF16744	UF 16744	0	0	45600	1431	0	WA	398	7.17	307	630
996	Ophiotoma~paucispina~F239747_AU_3s	Ophiotretidae	Ophiotoma	paucispina	F239747	MV F239747	0	0	45137	1419	613	AU	4037	-41.62	149.55	625
997	Ophiotoma~sp~F239904_AU_3	Ophiotretidae	Ophiotoma	sp	F239904	MV F239904	0	0	45327	1419	0	AU	2803	-32.985	152.952	626
998	Ophiotoma~spMoV5504~F162738_IP_3s	Ophiotretidae	Ophiotoma	spMoV5504	F162738	MV F162738	0	0	45327	1425	984	IP	397.5	-18.56	117.46	623
999	Ophiotoma~tertium~BP23_IP_3	Ophioscolecidae	Ophiotoma	tertium	BP23	MNHN	0	0	45451	1430	0	IP	1204.5	-2.73	150	850
1000	Ophiotreta~larissae~BP20_IP_3	Ophiotretidae	Ophiotreta	larissae	BP20	MNHN	0	0	45909	1431	0	IP	291	-7.48	147.55	598
1001	Ophiotreta~matura~BP18_IP_3	Ophiotretidae	Ophiotreta	matura	BP18	MNHN	1	0	45982	1431	0	IP	852.5	-2.68	150.05	610
1002	Ophiotreta~matura~MVF188864_NZ_3s	Ophiotretidae	Ophiotreta	matura	MVF188864	MV F188864	0	0	42573	1431	985	NZ	695.5	-37.169	176.659	611
1003	Ophiotreta~sertata~TIM018_WA_3	Ophiotretidae	Ophiotreta	sertata	TIM018	UNAM-ICML 3.232.1	0	0	45707	1431	0	WA	671.9	18.95	265.66	609
1004	Ophiotreta~spMoV5240~F110565_AU_3	Ophiotretidae	Ophiotreta	spMoV5240	F110565	MV F110565	0	0	38644	939	0	AU	607.5	-34.23	162.67	617
1005	Ophiotreta~spMoV5497~F144703_AU_3	Ophiotretidae	Ophiotreta	spMoV5497	F144703	MV F144703	0	0	45937	1170	0	AU	625	-43.92	150.46	599
1006	Ophiotreta~stimulea~TOH273-IE.2014.2050_IN_3s	Ophiotretidae	Ophiotreta	stimulea	TOH273-IE.2014.2050	MNHN IE.2014.2050	0	0	45941	1422	985	IN	865.5	-25.58	44.25	606
1007	Ophiotreta~stimulea~BP21_IP_3s	Ophiotretidae	Ophiotreta	stimulea	BP21	MNHN IE.2007.2914	0	0	45976	1431	985	IP	459	-9.13	152.32	607
1008	Ophiotreta~valenciennesi~NA064.017.01.A_EP_3s	Ophiotretidae	Ophiotreta	valenciennesi	NA064.017.01.A		0	0	45906	1431	668	EP	354	1.23132	268.887	603
1009	Ophiotreta~valenciennesi~IE.2007.4292_IN_3s	Ophiotretidae	Ophiotreta	valenciennesi	IE.2007.4292	MNHN IE.2007.4292	0	0	45953	1419	668	IN	161	-24.38	47.53	602
1010	Ophiotreta~valenciennesi~BP22_IP_3s	Ophiotretidae	Ophiotreta	valenciennesi	BP22	MNHN	1	0	45940	1419	668	IP	410	-6.05	147.6	604
1011	Ophiotreta~valenciennesi.rufescens~UF8999_WA_3s	Ophiotretidae	Ophiotreta	valenciennesi.rufescens	UF8999	UF 8999	0	0	45922	1431	985	WA	457	24.22	278.51	605
1012	Ophiotretid~sp~F162737_IP_3	Ophiotretidae	Ophiotretid	sp	F162737	MV F162737	1	0	45851	1428	0	IP	400	-13.22	123.39	618
1013	Ophiotypa~simplex~AB02.CS.52_EP_3	Ophiolepididae	Ophiotypa	simplex	AB02.CS.52	BMNH	0	1	41806	1431	0	EP	4047	12.1638	242.789	287
1014	Ophiozonella~bispinosa~F159749_AU_3	Ophioplocidae	Ophiozonella	bispinosa	F159749	MV F159749	0	0	44511	1428	0	AU	350	-35.22	134.51	343
1015	Ophiozonella~bispinosa~BP68_IP_3	Ophioplocidae	Ophiozonella	bispinosa	BP68	MNHN IE.2007.2916	1	0	44594	1428	0	IP	398.5	-5.62	154.02	342
1016	Ophiozonella~casta~BP64_IP_3	Ophiolepididae	Ophiozonella	casta	BP64	MNHN IE.2007.2853	1	0	45919	1431	0	IP	472.5	-6.75	147.82	289
1017	Ophiozonella~cf.bispinosa~IE.2007.6834_IP_3	Ophioplocidae	Ophiozonella	cf.bispinosa	IE.2007.6834	MNHN IE.2007.6834	0	0	44295	1428	0	IP	424.5	-22.06	168.68	339
1018	Ophiozonella~cf.molesta~UNAM9710_WA_3	Ophiolepididae	Ophiozonella	cf.molesta	UNAM9710	UNAM-ICML	0	0	43537	1431	0	WA	572	23.642	272.919	283
1019	Ophiozonella~confusa~IE.2007.6841_IP_3	Ophioplocidae	Ophiozonella	confusa	IE.2007.6841	MNHN IE.2007.6841	0	0	43880	1428	0	IP	343	-22.3	168.7	313
1020	Ophiozonella~depressa~BP67_IP_3	Ophioplocidae	Ophiozonella	depressa	BP67	MNHN	0	0	44771	1428	0	IP	1204.5	-2.73	150	347
1021	Ophiozonella~hexactis~Tania17-44_NWP_3	na3	Ophiozonella	hexactis	Tania17-44	NSMT E8665	0	0	43170	1428	0	NWP	83	na	na	420
1022	Ophiozonella~insularia~IE.2007.7497_IP_3	Ophiolepididae	Ophiozonella	insularia	IE.2007.7497	MNHN IE.2007.7497	0	0	45928	1422	0	IP	466	-20.1	160.37	290
1023	Ophiozonella~longispina~IE.2007.2864_IP_3	Ophioplocidae	Ophiozonella	longispina	IE.2007.2864	MNHN IE.2007.2864	0	0	43821	1428	0	IP	616.5	-6.02	147.58	340
1024	Ophiozonella~molesta~BP69_IP_3	Ophiolepididae	Ophiozonella	molesta	BP69	MNHN IE.2007.2904	1	0	45654	1419	0	IP	602.5	-5.35	150.75	284
1025	Ophiozonella~nivea~UF3603_WA_3	Ophiolepididae	Ophiozonella	nivea	UF3603	UF 3603	0	0	45843	1428	0	WA	340	24.56	276.34	291
1026	Ophiozonella~oedilepis~Tania17-24_NWP_3	Ophioplocidae	Ophiozonella	oedilepis	Tania17-24	NSMT E8693	0	0	45516	1428	0	NWP	149.1	33.36	139.65	332
1027	Ophiozonella~platydisca~Tania17-13_NWP_3	Ophioplocidae	Ophiozonella	platydisca	Tania17-13	NSMT	0	0	44592	1428	0	NWP	340	na	na	344
1029	Ophiozonella~projecta~BP62_IP_3	Ophioplocidae	Ophiozonella	projecta	BP62	MNHN	0	0	45346	1428	0	IP	349	-8.27	150.48	351
1030	Ophiozonella~projecta~Tania17-02_NWP_3	Ophioplocidae	Ophiozonella	projecta	Tania17-02	NSMT E8735	0	0	44733	1428	0	NWP	27	na	na	352
1031	Ophiozonella~sp~BP66_IP_3	Ophioplocidae	Ophiozonella	sp	BP66	MNHN	0	0	44504	1428	0	IP	524.5	-9.15	152.25	341
1032	Ophiozonella~spMoV5669~IE.2013.6058_IP_3	Ophioplocidae	Ophiozonella	spMoV5669	IE.2013.6058	MNHN IE.2013.6058	0	0	44828	1428	0	IP	783.5	-21.52	162.55	345
1033	Ophiozonella~stellata~85997_NZ_3	Ophioplocidae	Ophiozonella	stellata	85997	NIWA 85997	0	0	44312	1431	0	NZ	1446	-37.3	177.86	346
1034	Ophiozonella~subtilis~BP65_IP_3	Ophiolepididae	Ophiozonella	subtilis	BP65	MNHN	0	0	45827	1419	0	IP	410.5	-6.73	147.83	288
1035	Ophiozonoida~obscura~F146305_IP_3	Ophioplocidae	Ophiozonoida	obscura	F146305	MV F146305	0	0	45059	1431	0	IP	110	-12.43	123.59	333
1036	Ophiozonoida~picta~77719_NZ_3s	Ophioplocidae	Ophiozonoida	picta	77719	NIWA 77719	1	0	44599	1431	986	NZ	75	-34.18	172.13	334
1037	Ophiura~acervata~UF9006_WA_3	Ophiuridae	Ophiura	acervata	UF9006	UF 9006	0	0	42823	1431	0	WA	230	24.28	278.48	1204
1038	Ophiura~aequalis~BP51_IP_3s	Ophiuridae	Ophiura	aequalis	BP51	MNHN	1	0	44123	1431	986	IP	813	-4.67	151.55	1199
1040	Ophiura~ambigua~TOH86-IE.2013.267_SK_3	Ophiopyrgidae	Ophiura	ambigua	TOH86-IE.2013.267	MNHN IE.2013.16267	0	0	45923	1431	0	SK	99	-48.67	69.12	1112
1041	Ophiura~bathybia~TIM042_NWP_3	Ophiuridae	Ophiura	bathybia	TIM042	NSMT E5764	0	0	43487	1431	0	NWP	5678	42.12	146.21	1201
1042	Ophiura~brevispinosa~TOH91-IE.2013.16277_SK_3	Ophiopyrgidae	Ophiura	brevispinosa	TOH91-IE.2013.16277	MNHN IE.2013.16277	0	0	45644	1431	0	SK	12.5	-49.53	69.88	1098
1043	Ophiura~carinifera~2009.6366_AN_3	Ophiopyrgidae	Ophiura	carinifera	2009.64	MNHN IE.2009.6366	0	0	45571	1431	0	AN	466	-66	143.31	1111
1045	Ophiura~cf.fraterna~TOH240-IE.2011.564_SK_3s	Ophiopyrgidae	Ophiura	cf.fraterna	TOH240-IE.2011.564	MNHN IE.2011.564	0	0	45925	1431	986	SK	190.5	-47.27	70.7	1113
1046	Ophiura~cf.lenticularis~NIWA90006_NZ_3s	Ophiopyrgidae	Ophiura	cf.lenticularis	NIWA90006	NIWA 90006	0	0	45834	1431	987	NZ	2455	-42.75	164	1123
1047	Ophiura~cf.ooplax~opIM4_IP_3	Ophiuridae	Ophiura	cf.ooplax	opIM4	MV F159721	0	0	43235	1428	0	IP	400	-17.517	118.853	1194
1048	Ophiura~clemens~F227589_AU_3	Ophiopyrgidae	Ophiura	clemens	F227589	MV F227589	0	0	44101	1428	0	AU	987.5	-34.7	132.53	1101
1049	Ophiura~clemens~BP50_IP_3	Ophiopyrgidae	Ophiura	clemens	BP50	MNHN	0	0	45970	1431	0	IP	916	-7.38	147.58	1100
1050	Ophiura~costata~A88443_SA_3	Ophiopyrgidae	Ophiura	costata	A88443	SAMC MB-A88443	0	0	45590	1428	0	SA	172	-36.55	20.61	1093
1051	Ophiura~crassa~F171151_AN_3s	Ophiopyrgidae	Ophiura	crassa	F171151	MV F171151	0	0	45790	1431	807	AN	149	-60.76	313.73	1090
1052	Ophiura~falcifera~UF16797_WA_3	Ophiopyrgidae	Ophiura	falcifera	UF16797	UF 16797	0	0	45786	1428	0	WA	240	6.68	307.51	1094
1053	Ophiura~fallax~UF17057_WA_3	Ophiuridae	Ophiura	fallax	UF17057	UF 17057	0	0	42638	1431	0	WA	57	5.61	307.83	1205
1054	Ophiura~figurata~CAS161461_SM_3	Ophiopyrgidae	Ophiura	figurata	CAS161461	CAS 161461	1	0	45962	1428	0	SM	2951.5	-58.26	335.1	1118
1055	Ophiura~flagellata~K3974_AU_3	Ophiopyrgidae	Ophiura	flagellata	K3974	SAM K3974	0	0	45961	1428	0	AU	950	-35.152	134.099	1172
1056	Ophiura~flagellata~BP56_IP_3	Ophiopyrgidae	Ophiura	flagellata	BP56	MNHN IE.2007.2813	0	0	45647	1428	0	IP	852.5	-2.68	150.05	1171
1057	Ophiura~flexibilis~2009.6325_AN_3	Ophiopyrgidae	Ophiura	flexibilis	2009.63	MNHN IE.2009.6325	1	0	45878	1431	0	AN	437	-66.01	142.71	1089
1058	Ophiura~fluctuans~BP55_IP_3	Ophiopyrgidae	Ophiura	fluctuans	BP55	MNHN IE.2007.2802	0	0	45937	1428	0	IP	994.5	-3.27	147.3	1175
1059	Ophiura~fraterna~CAS161422_AN_3s	Ophiopyrgidae	Ophiura	fraterna	CAS161422	CAS 161422	0	0	45933	1431	808	AN	353.5	-60.968	304.886	1130
1060	Ophiura~fraterna~CAS161547_SM_3s	Ophiopyrgidae	Ophiura	fraterna	CAS161547	CAS 161547	0	0	45928	1431	808	SM	3730	-59.68	302.4	1131
1061	Ophiura~indica~SBD036189_IP_3s	Ophiuridae	Ophiura	indica	SBD036189	MTQ SBD036189	1	0	37075	1428	984	IP	89	-21.34	152.72	1190
1062	Ophiura~irrorata~F239974_AU_3s	Ophiopyrgidae	Ophiura	irrorata	F239974	MV F239974	0	0	45907	1431	987	AU	3851.5	-38.47	150.18	1122
1063	Ophiura~irrorata~TOH258-IE.2014.2009_IP_3s	Ophiopyrgidae	Ophiura	irrorata	TOH258-IE.2014.2009	MNHN IE.2014.2009	0	0	45767	1431	872	IP	1668.5	21.62	118.3	1127
1064	Ophiura~irrorata.concreta~F222707_AU_3s	Ophiopyrgidae	Ophiura	irrorata.concreta	F222707	MV F222707	0	0	43824	1431	987	AU	2028	-44.32	147.31	1116
1065	Ophiura~irrorata.concreta~BP53_IP_3s	Ophiopyrgidae	Ophiura	irrorata.concreta	BP53	MNHN IE.2007.2915	0	0	45512	1431	987	IP	852.5	-2.68	150.05	1128
1066	Ophiura~irrorata.loveni~PS139.5a_SM_3s	Ophiopyrgidae	Ophiura	irrorata.loveni	PS139.5a	CAS	0	0	45590	1431	987	SM	3939.5	-58.251	335.633	1129
1067	Ophiura~irrorata1~F146198_AU_3	Ophiopyrgidae	Ophiura	irrorata1	F146198	MV F146198	0	0	45484	1428	489	AU	1140	-44.2	146.19	1085
1068	Ophiura~irrorata1~F193436_NZ_3	Ophiopyrgidae	Ophiura	irrorata1	F193436	MV F193436	0	0	45501	1431	0	NZ	1416.5	-36.32	178.05	1086
1069	Ophiura~irrorata2~F227608_AU_3s	Ophiopyrgidae	Ophiura	irrorata2	F227608	MV F227608	0	0	45471	1431	872	AU	987.5	-34.7	132.51	1117
1070	Ophiura~kinbergi~F101809_AU_3s	Ophiuridae	Ophiura	kinbergi	F101809	MV F101809	0	0	33966	1431	986	AU	8	-38.27	144.7	1189
1071	Ophiura~kinbergi~TOH248-IE.2007.4330_IN_3s	Ophiuridae	Ophiura	kinbergi	TOH248-IE.2007.4330	MNHN IE.2007.4330	0	0	42560	1431	986	IN	64.5	-25.07	47.05	1192
1074	Ophiura~leptoctenia~TIM048_NWP_3	Ophiuridae	Ophiura	leptoctenia	TIM048	NSMT E5875	0	0	43328	1431	0	NWP	453	38.03	142.08	1200
1076	Ophiura~lymani~PS143.2_SM_3s	Ophiopyrgidae	Ophiura	lymani	PS143.2	CAS	0	0	45904	1428	986	SM	774	-58.739	334.825	1109
1077	Ophiura~meridionalis~2009.6641_AN_3	Ophiopyrgidae	Ophiura	meridionalis	2009.66	MNHN IE.2009.6641	0	0	45955	1431	0	AN	1642.5	-65.76	142.91	1105
1079	Ophiura~micracantha~BP52_IP_3s	Ophiuridae	Ophiura	micracantha	BP52	MNHN	1	0	42505	1431	984	IP	378	-5.37	145.8	1188
1080	Ophiura~migrans~CAS161447_AN_3	Ophiopyrgidae	Ophiura	migrans	CAS161447	CAS 161447	1	0	45910	1428	0	AN	1116.5	-65.33	305.75	1084
1081	Ophiura~migrans~CAS161457_SM_3	Ophiopyrgidae	Ophiura	migrans	CAS161457	CAS 161457	0	0	45482	1431	0	SM	2284	-58.41	334.98	1083
1082	Ophiura~mimaria~CAS161427_AN_3s	Ophiopyrgidae	Ophiura	mimaria	CAS161427	CAS 161427	0	0	45834	1428	987	AN	2896	-60.64	306.04	1126
1083	Ophiura~ooplax~opHU3a_AU_3s	Ophiuridae	Ophiura	ooplax	opHU3a	MV F144878	1	0	43031	1428	882	AU	390	-43.99	147.54	1197
1085	Ophiura~ophiura~GOT6445_NEA_3	Ophiuridae	Ophiura	ophiura	GOT6445	Göteborg Echin6445	0	0	43690	1431	0	NEA	20.5	56.62	12.64	1232
1086	Ophiura~ossiculata~CAS161437_AN_3s	Ophiopyrgidae	Ophiura	ossiculata	CAS161437	CAS 161437	0	0	45926	1428	987	AN	2086	-65.29	306.61	1125
1087	Ophiura~palliata~F222712_AU_3s	Ophiopyrgidae	Ophiura	palliata	F222712	MV F222712	0	0	45465	1431	521	AU	455	-44.05	147.4	1174
1089	Ophiura~rouchi~2009.6628_AN_3s	Ophiopyrgidae	Ophiura	rouchi	2009.66	MNHN IE.2009.6628	0	0	45896	1428	985	AN	428	-65.86	143	1108
1090	Ophiura~rugosa~F146173_AU_3s	Ophiopyrgidae	Ophiura	rugosa	F146173	MV F146173	0	0	45776	1431	986	AU	1150	-44.11	146.27	1082
1091	Ophiura~sarsii~F214044_AR_3	Ophiuridae	Ophiura	sarsii	F214044	MV F214044	1	0	42664	1431	0	AR	352	70.14	17.94	1213
1094	Ophiura~sarsii~TIM046_NWP_3	Ophiuridae	Ophiura	sarsii	TIM046	NSMT E7274	0	0	43430	1431	0	NWP	164.5	na	na	1210
1096	Ophiura~spinicantha~F227395_AU_3	Ophiuridae	Ophiura	spinicantha	F227395	MV F227395	0	0	43697	1431	0	AU	2750	-44.66	147.47	1203
1097	Ophiura~spinicantha~NIWA86382_NZ_3	Ophiuridae	Ophiura	spinicantha	NIWA86382	NIWA 86382	0	0	43640	1428	0	NZ	2945	-35.39	178.22	1202
1100	Ophiura~spMoV2734~F146165_AU_3	Ophiopyrgidae	Ophiura	spMoV2734	F146165	MV F146165	0	0	45660	1419	0	AU	930	-44.03	147.57	1065
1102	Ophiura~spMoV4526~40598_NZ_3s	Ophiopyrgidae	Ophiura	spMoV4526	40598	NIWA 40598	0	0	45936	1428	711	NZ	1123.5	-53.72	159.16	1176
1103	Ophiura~spMoV4545~F159788_AU_3	Ophiopyrgidae	Ophiura	spMoV4545	F159788	MV F159788	0	0	45941	1428	0	AU	1260	-44.28	147.13	1168
1104	Ophiura~spMoV4545~NIWA42258_NZ_3	Ophiopyrgidae	Ophiura	spMoV4545	NIWA42258	NIWA 42258	0	0	45961	1431	0	NZ	1050	-42.76	180.07	1167
1105	Ophiura~spMoV6591~F168821_AN_3s	Ophiopyrgidae	Ophiura	spMoV6591	F168821	MV F168821	0	0	45898	1431	986	AN	162	-60.47	313.24	1107
1106	Ophiura~spMoV7067~F227625_AU_3	Ophiopyrgidae	Ophiura	spMoV7067	F227625	MV F227625	0	0	45382	1428	0	AU	1863	-35.15	131.64	1097
1107	Ophiura~tenera~UF17034_WA_3	Ophiopyrgidae	Ophiura	tenera	UF17034	UF 17034	1	0	45739	1428	0	WA	537	6.97	307.37	1092
1108	Ophiura~trimeni~A88477_SA_3	Ophiuridae	Ophiura	trimeni	A88477	SAMC MB-A88477	0	0	43909	1431	0	SA	436	-33.01	17.05	1195
1109	Ophiura~verrucosa~F239722_AU_3s	Ophiopyrgidae	Ophiura	verrucosa	F239722	MV F239722	0	0	45861	1431	987	AU	2534.5	-32.57	153.16	1132
1110	Ophiurochaeta~cf.exilis~IE.2007.6896_IP_3s	na1	Ophiurochaeta	cf.exilis	IE.2007.6896	MNHN IE.2007.6896	1	0	45183	1431	987	IP	571	-22.38	171.65	801
1111	Ophiurochaeta~exilis~F159734_IP_3s	Ophiomyxidae	Ophiurochaeta	exilis	F159734	MV F159734	1	0	45321	1431	987	IP	110	-17.59	118.98	758
1112	Ophiuroconis~pulverulenta~DW3891_IP_3s	Ophioscolecidae2	Ophiuroconis	pulverulenta	DW3891	MNHN	0	0	43955	1422	988	IP	585	-22.41	171.68	805
1113	Ophiuroidea~sp~F239883_IP_3	Ophiotretidae	Ophiuroidea	sp	F239883	MV F239883	0	0	45374	1422	0	IP	4269	-27.0078	154.223	619
1116	Ophiurothamnus~clausa~F159592_IP_3	Ophiacanthidae	Ophiurothamnus	clausa	F159592	MV F159592	1	0	45409	1254	0	IP	1000	-14.55	121.25	493
1118	Perlophiura~profundissima~F239746_AU_3	Ophiosphalmidae	Perlophiura	profundissima	F239746	MV F239746	0	0	44181	1428	0	AU	4441	-30.26	153.87	975
1119	Sigsbeia~conifera~TANIA663_WA_3s	Ophioplocidae	Sigsbeia	conifera	TANIA663	UF 12820	0	0	45547	1428	986	WA	18	16.46	298.46	327
1120	Sigsbeia~lineata~TANIA91-187.1_WA_3	Ophioplocidae	Sigsbeia	lineata	TANIA91-187.1	LACM 91-187.1	0	0	45512	1428	0	WA	na	na	na	326
1121	Sigsbeia~murrhina~TANIA97-6.1_WA_3	Ophioplocidae	Sigsbeia	murrhina	TANIA97-6.1	LACM 97-6.1	0	0	45232	1428	0	WA	na	na	na	328
1122	Spinophiura~jolliveti~vent_EP_3s	Ophiopyrgidae	Spinophiura	jolliveti	vent	MNHN	1	0	45874	1431	986	EP	na	na	na	1099
1125	Stegophiura~lapidaria~BP57_IP_3	Ophiopyrgidae	Stegophiura	lapidaria	BP57	MNHN IE.2007.2942	1	0	45804	1377	0	IP	319.5	-4	153.6	1033
1127	Stegophiura~rhabdotoplax~IE.2007.7273_IP_3	Ophiopyrgidae	Stegophiura	rhabdotoplax	IE.2007.7273	MNHN IE.2007.7273	0	0	45252	1431	0	IP	675.5	-22.28	171.29	1034
1128	Stegophiura~singletoni~F144860_AU_3s	Ophiopyrgidae	Stegophiura	singletoni	F144860	MV F144860	0	0	45833	1431	987	AU	1140	-44.2	146.19	1029
1130	Sthenocephalus~indicus~F162685_IP_3	Euryalidae	Sthenocephalus	indicus	F162685	MV F162685	1	0	44488	1431	0	IP	390	-13.26	123.37	879
1135	Amphiophiura~solida~F159651_IP_3	Ophiopyrgidae	Amphiophiura	solida	F159651	MV F159651	0	0	31921	1431	0	IP	400	-13.22	123.39	1055
1136	Amphioplus~didymus~SBD001285_IP_3	Amphiuridae	Amphioplus	didymus	SBD001285	MTQ SBD001285	0	0	40862	1419	0	IP	74.05	-18.36	147.28	84
1140	Amphiura~microsoma~UF9933_IP_3	Amphiuridae	Amphiura	microsoma	UF9933	UF 9933	0	0	44595	1299	0	IP	na	-23.4321	151.934	72
1147	Ophiactis~plana~UF13019_IP_3	Ophiactidae	Ophiactis	plana	UF13019	UF 13019	0	0	44786	1422	0	IP	505	-17.58	210.72	153
1148	Ophiambix~epicopus~TOH222-IE.2013.5412_IP_3s	Ophioscolecidae2	Ophiambix	epicopus	TOH222-IE.2013.5412	MNHN IE.2013.5412	0	0	37410	1425	997	IP	667.5	-15	166.92	806
1150	Ophiernus~adspersus~CP3854.1_IP_3s	Ophiernidae	Ophiernus	adspersus	CP3854.1	MNHN	1	0	38182	1413	986	IP	570	-22.3	168.743	423
1151	Ophiochasma~stellata~F159726_IP_3s	Ophiodermatidae	Ophiochasma	stellata	F159726	MV F159726	0	0	45212	1431	986	IP	100	-13.46	124.01	733
1156	Ophiolepis~rugosa~TANIA669_IP_3	na3	Ophiolepis	rugosa	TANIA669	UF 17490	0	0	45084	1419	0	IP	na	na	na	421
1157	Ophioleuce~regulare~F168700_AU_3	Ophioleucidae	Ophioleuce	regulare	F168700	MV F168700	1	0	42667	1125	0	AU	1776	-44.38	147.26	442
1158	Ophioleuce~seminudum~BP16_IP_3	Ophioleucidae	Ophioleuce	seminudum	BP16	MNHN IE.2007.2938	0	0	34085	1428	460	IP	498.5	-4.1	151.93	439
1164	Ophiomusium~incertum~F227956_AU_3	Ophiomusaidae	Ophiomusium	incertum	F227956	MV F227956	0	0	44457	1428	0	AU	400	-33.52	131.13	1018
1165	Ophiomyxa~compacta~SBD018466_IP_3s	Ophiomyxidae	Ophiomyxa	compacta	SBD018466	MTQ SBD018466	0	0	39945	1428	987	IP	15.3	-13.06	143.8	771
1166	Ophionereis~annulata~TANIA264_EP_3	Ophionereididae	Ophionereis	annulata	TANIA264	CZA E022	0	0	45948	1431	0	EP	na	-3.98	279.03	404
1167	Ophionereis~dubia~TIM032_IP_3	Ophionereididae	Ophionereis	dubia	TIM032	NSMT E5543	0	0	45840	1431	0	IP	164.5	5.378	100.115	392
1168	Ophionereis~dubia~UF9589_IP_3	Ophionereididae	Ophionereis	dubia	UF9589	UF 9589	0	0	45831	1428	0	IP	1.5	-22.69	113.66	388
1169	Ophionereis~perplexa~TANIA336_EP_3	Ophionereididae	Ophionereis	perplexa	TANIA336	CZA E125	0	0	45920	1431	0	EP	na	-3.98	279.03	400
1171	Ophiopallas~paradoxa~BP15_IP_3	Ophioleucidae	Ophiopallas	paradoxa	BP15	MNHN IE.2007.2926	0	0	26920	1419	0	IP	410.5	-6.73	147.83	452
1172	Ophiopallas~valens~F93983_IP_3	Ophiodermatidae	Ophiopallas	valens	F93983	MV F93983	0	0	21748	1428	0	IP	169	-11.73	125.08	698
1174	Ophiopeza~spinosa~F159637_IP_3	Ophiopezidae	Ophiopeza	spinosa	F159637	MV F159637	0	0	45917	1419	0	IP	92.5	-21.03	114.88	746
1180	Ophiopsila~multispina~IE.2007.6912_IP_3s	Ophiopsilidae	Ophiopsila	multispina	IE.2007.6912	MNHN IE.2007.6912	0	0	39793	1425	984	IP	396	-22.06	168.62	275
1181	Ophiopsila~pantherina~SBD035977_IP_3s	Ophiopsilidae	Ophiopsila	pantherina	SBD035977	MTQ SBD035977	0	0	41998	1428	986	IP	39.3	-24.21	152.81	278
1184	Ophiotreta~valenciennesi~UF13020_IP_3s	Ophiotretidae	Ophiotreta	valenciennesi	UF13020	UF 13020	0	0	45918	1431	668	IP	460	-17.57	210.1	601
1185	Ophiozonella~projecta~IE.2013.6119_IP_3	Ophioplocidae	Ophiozonella	projecta	IE.2013.6119	MNHN IE.2013.6119	0	0	44649	1428	0	IP	327	-24.68	159.72	353
1186	Ophiura~indica~F159711_IP_3s	Ophiuridae	Ophiura	indica	F159711	MV F159711	0	0	39228	1428	984	IP	77	-15.09	121.78	1191
1187	Ophiuroconis~pulverulenta~IE.2007.6923_IP_3s	Ophioscolecidae2	Ophiuroconis	pulverulenta	IE.2007.6923	MNHN IE.2007.6923	0	0	43258	1431	988	IP	692	-22.3	168.77	803
1188	Ophiuroconis~pulverulenta~IE.2007.5371_IP_3s	Ophioscolecidae2	Ophiuroconis	pulverulenta	IE.2007.5371	MNHN IE.2007.5371	1	0	44592	1419	988	IP	720.5	-20.1	160.35	804
1190	AB2_EB2_15_10~Amphioplus~daleus	Amphiuridae	Amphioplus	daleus	AB2_EB2_15_10	DZMB	1	1	0	657	969	EP	4219	12.531	-116.623	7
1191	AB1_EB3_9_5~Amphioplus~cf.daleus	Amphiuridae	Amphioplus	cf.daleus	AB1_EB3_9_5	DZMB	1	1	0	657	0	EP	4143	13.955	-116.514	12
1191	AB1_EB3_9_5~Amphioplus~cf.daleus	Amphiuridae	Amphioplus	cf.daleus	AB2_EB1_14_27	DZMB	1	1	0	0	986	EP	4209	12.367	-116.55	12
1192	MA13_18_8~Amphilepis~species.5	Amphilepididae	Amphilepis	species.5	MA13_18_8	DZMB	1	1	0	657	985	EP	4133	11.8292	-117.006	125
1193	SO239_20_12~Ophiotoma~species.21	Ophiotretidae	Ophiotoma	species.21	SO239_20_12	DZMB	1	1	0	657	908	EP	4093	11.8385	-116.98	627
1194	SO239_397~Ophioleuce~gracilis	Ophioleucidae	Ophioleuce	gracilis	SO239_397	DZMB	1	1	0	656	978	EP	2882	11.6837	-117.452	446
1195	SO239_192_8~Ophioscolecidae~species.20	Ophioscolecidae3	Ophioscolecidae	species.20	SO239_192_8	DZMB	1	1	0	657	0	EP	4946	14.057	-130.133	813
1195	SO239_192_8~Ophioscolecidae~species.20	Ophioscolecidae3	Ophioscolecidae	species.20	SO239_158_3	DZMB	1	1	0	0	986	EP	>4000	18.756	-128.34	813
1196	AB2_EB2_12_10~Ophioscolecidae~species.19	Ophioscolecidae3	Ophioscolecidae	species.19	AB2_EB2_12_10	DZMB	1	1	0	657	986	EP	4219	12.531	-116.623	810
1197	SO242_1_116~Ophioscolecidae~species.38	Ophioscolecidae3	Ophioscolecidae	species.38	SO242_1_116	DZMB	1	1	0	657	0	EP	4195	-7.11917	-88.4387	812
1198	SO242_1_347~Ophioscolecidae~species.18	Ophioscolecidae3	Ophioscolecidae	species.18	SO242_1_347	DZMB	1	1	0	657	986	EP	4168	-7.09218	-88.5526	811
1199	SO239_197_2~Ophiophyllum~species.15	Ophiopyrgidae	Ophiophyllum	species.15	SO239_197_2	DZMB	1	1	0	657	0	EP	4822	18.818	-128.355	1081
1199	SO239_197_2~Ophiophyllum~species.15	Ophiopyrgidae	Ophiophyllum	species.15	SO239_139_1	DZMB	1	1	0	0	986	EP	4541	13.874	-123.274	1081
1200	AB2_EB1_16_7~Ophiuroglypha~species.6	Ophiopyrgidae	Ophiuroglypha	species.6	AB2_EB1_16_7	DZMB	1	1	0	657	978	EP	4209	12.3673	-116.55	1119
1201	SO242_2_176_F8~Ophiuroglypha~species.7	Ophiopyrgidae	Ophiuroglypha	species.7	SO242_2_176_F8	DZMB	1	1	0	657	0	EP	4100	-7.07414	-88.4487	1124
1202	SO239_59_18~Ophiuroglypha~species.14	Ophiopyrgidae	Ophiuroglypha	species.14	SO239_59_18	DZMB	1	1	0	657	986	EP	>4000	11.8092	-117.484	1133
1203	SO239_395~Ophiuroglypha~species.11	Ophiopyrgidae	Ophiuroglypha	species.11	SO239_395	DZMB	1	1	0	657	986	EP	2852.6	11.684	-117.452	1103
1204	SO239_2087~Ophiuroglypha~species.9	Ophiopyrgidae	Ophiuroglypha	species.9	SO239_2087	DZMB	1	1	0	657	963	EP	4671	18.8237	-128.429	1104
1205	SO239_59_10~Ophiopyrgidae~species.8	Ophiopyrgidae	Ophiopyrgidae	species.8	SO239_59_10	DZMB	1	1	0	657	983	EP	>4000	11.8092	-117.484	1102
1206	SO239_396~Anophiura~species.10	Ophiopyrgidae	Anophiura	species.10	SO239_396	DZMB	1	1	0	656	986	EP	2852.6	11.6839	-117.452	1091
1207	AB1_EB4_11_9~Amphiophiura~bullata	Ophiopyrgidae	Amphiophiura	bullata	AB1_EB4_11_9	DZMB	1	1	0	657	988	EP	4128	13.8042	-116.47	1043
1208	SO239_2113~Asteroschema~species.12	Euryalidae	Asteroschema	species.12	SO239_2113	DZMB	1	1	0	657	995	EP	1667	18.543	-128.75	899
1209	SO242_1_387_A7~Perlophiura~profundissima	Ophiosphalmidae	Perlophiura	profundissima	SO242_1_387_A7	DZMB	1	1	0	657	0	EP	4277.4	-7.130	-88.3779	974
1209	SO242_1_387_A7~Perlophiura~profundissima	Ophiosphalmidae	Perlophiura	profundissima	SO242_53_033	DZMB	1	1	0	0	993	EP	4162	-7.089	-88.467	974
1210	MA13_07_7~Ophiosphalma~cf.glabrum	Ophiosphalmidae	Ophiosphalma	cf.glabrum	MA13_07_7	DZMB	1	1	0	657	984	EP	4131	11.8584	-117.02	978
1211	NODBIO_80_2~Ophiosphalma~glabrum	Ophiosphalmidae	Ophiosphalma	glabrum	NODBIO_80_2	DZMB	1	1	0	657	962	EP	4986	14.094	-130.066	981
1212	SO239_192_6~Ophiohelidae~species.32	Ophiohelidae	Ophiohelidae	species.32	SO239_192_6	DZMB	1	1	0	654	982	EP	>4000	18.7557	-128.34	831
1213	SO239_59_1~Ophioleucidae~species.22	Ophioleucidae	Ophioleucidae	species.22	SO239_59_1	DZMB	1	1	0	657	986	EP	>4000	11.8092	-117.484	434
1214	AB1_EB5_10_9~Ophioleucidae~species.33	Ophioleucidae	Ophioleucidae	species.33	AB1_EB5_10_9	DZMB	1	1	0	657	995	EP	4196	13.933	-116.675	435
1215	SO239_139_2~Ophioleucidae~species.37	Ophioleucidae	Ophioleucidae	species.37	SO239_139_2	DZMB	1	1	0	657	986	EP	4541	13.8735	-123.274	437
1216	MA14_21_3~Ophioleucidae~species.34	Ophioleucidae	Ophioleucidae	species.34	MA14_21_3	DZMB	1	1	0	657	986	EP	4132	11.829	-117.008	438
1217	AB2_EB1_13_24~Ophioleucidae~species.35	Ophioleucidae	Ophioleucidae	species.35	AB2_EB1_13_24	DZMB	1	1	0	657	975	EP	4209	12.3673	-116.55	436
1218	MA14_21_12~Ophiernus~species.31	Ophiernidae	Ophiernus	species.31	MA14_21_12	DZMB	1	1	0	657	986	EP	4132	11.829	-117.008	430
1219	SO239_197_4~Ophioscolecidae~species.17	Ophioscolecidae3	Ophioscolecidae	species.17	SO239_197_4	DZMB	1	1	0	657	986	EP	4822.2	18.8182	-128.355	814
1220	SO239_118_1~Ophiotypa~simplex	Ophiolepididae	Ophiotypa	simplex	SO239_118_1	DZMB	1	1	0	657	986	EP	4511.7	13.873	-123.251	286
1221	MA13_85_17 / MA14_21_10~Ophiocymbium~species.40	Ophiohelidae	Ophiocymbium	species.40	MA13_85_17	DZMB	1	1	0	657	975	EP	4376	11.799	-117.505	824
1221	MA13_85_17 / MA14_21_10~Ophiocymbium~species.40	Ophiohelidae	Ophiocymbium	species.40	MA14_21_10	DZMB	1	1	0	657	0	EP	4132	11.829	-117.008	824
1222	AB1_EB4_11_30~Ophiocymbium~species.25	Ophiohelidae	Ophiocymbium	species.25	AB1_EB4_11_30	DZMB	1	1	0	0	979	EP	4128	13.8042	-116.47	825
1223	MA13_18_5~Ophiocymbium~species.39	Ophiohelidae	Ophiocymbium	species.39	MA13_18_5	DZMB	1	1	0	657	965	EP	4133	11.8292	-117.006	821
1224	SO239_192_4~Ophiocymbium~species.24	Ophiohelidae	Ophiocymbium	species.24	SO239_192_4	DZMB	1	1	0	657	0	EP	>4000	18.7557	-128.34	823
1225	AB2_EB1_13_40~Ophiocymbium~species.24	Ophiohelidae	Ophiocymbium	species.24	AB2_EB1_13_40	DZMB	1	1	0	657	979	EP	4209	12.3673	-116.55	822
1226	MA13_85_3~Ophiotholia~species.1	Ophiohelidae	Ophiotholia	species.1	MA13_85_3	DZMB	1	1	0	657	986	EP	4376	11.7987	-117.505	829
1227	AB1_EB4_11_26~Ophiomyces~species.26	Ophiohelidae	Ophiomyces	species.26	AB1_EB4_11_26	DZMB	1	1	0	657	986	EP	4128	13.8042	-116.47	820
1228	SO239_81_4~Ophiotholia~species.41	Ophiohelidae	Ophiotholia	species.41	SO239_81_4	DZMB	1	1	0	657	980	EP	4364.4	11.0715	-119.605	828
1229	AB2_EB2_12_13~Ophiotholia~species.28	Ophiohelidae	Ophiotholia	species.28	AB2_EB2_12_13	DZMB	1	1	0	657	979	EP	4219	12.531	-116.623	826
1230	SO239_415~Ophiacantha~cosmica	Ophiacanthidae	Ophiacantha	cosmica	SO239_415	DZMB	1	1	0	657	987	EP	4326.6	11.8136	-117.503	540
1231	SO239_192_5~Ophioleucidae~species.42	Ophioleucidae	Ophioleucidae	species.42	SO239_192_5	DZMB	1	1	0	657	0	EP	>4000	18.7557	-128.34	451
1232	SO239_133_1~Ophioleucidae~species.29	Ophioleucidae	Ophioleucidae	species.29	SO239_133_1	DZMB	1	1	0	657	0	EP	4507	13.8552	-123.229	449
1233	SO239_24_3~Ophioleucidae~species.29	Ophioleucidae	Ophioleucidae	species.29	SO239_24_3	DZMB	1	1	0	657	987	EP	4000	11.8645	-116.996	450
1234	SO242_1_309~Ophiernus~species.31	Ophiernidae	Ophiernus	species.31	SO242_1_309	DZMB	1	1	0	657	0	EP	4064.5	-7.00795	-88.4998	431
1235	SO239_197_3~Ophiotholia~species.28	Ophiohelidae	Ophiotholia	species.28	SO239_197_3	DZMB	1	1	0	657	980	EP	4822.2	18.8182	-128.355	827
1236	SO239_118_6~Ophiuroglypha~species.6	Ophiopyrgidae	Ophiuroglypha	species.6	SO239_118_6	DZMB	1	1	0	657	0	EP	4511.7	13.873	-123.252	1121
1236	SO239_118_6~Ophiuroglypha~species.6	Ophiopyrgidae	Ophiuroglypha	species.6	MA14_38_3	DZMB	1	1	0	0	976	EP	4363	11.798	-117.509	1121
1237	MA14_39_9~Amphilepis~species.5	Amphilepididae	Amphilepis	species.5	MA14_39_9	DZMB	1	1	0	657	0	EP	4361	11.8269	-117.514	124
1238	AB2_EB1_14_27~Amphioplus~cf.daleus	Amphiuridae	Amphioplus	cf.daleus	AB2_EB1_14_27	DZMB	1	1	0	657	986	EP	4209	12.3673	-116.55	11
